# Supplementary material for: A macrocycle-based new organometallic nano-vessel towards sustainable C2-selective arylation of free indole in water
Source: Royal Society of Chemistry journal article supplement (doi:10.1039/d4ob00886c), 2024-01-01
Supplement: d4ob00886c1.pdf [file d4ob00886c1.pdf]

## Electronic Supplementary Information

### **A macrocycle based new organometallic nano-vessel towards sustainable C2-selective arylation of free indole in water**

Subham Mandal<sup>a</sup>, Piyali Sarkar<sup>b</sup> and Pradyut Ghosh<sup>a,\*</sup>

<sup>a</sup>School of Chemical Sciences, Indian Association for the Cultivation of Science, 2A & 2B  
Raja S.C Mullick Road, Kolkata-700032, India. E-mail: [icpg@iacs.res.in](mailto:icpg@iacs.res.in)

<sup>b</sup>Institute of Health Sciences, Presidency University, Second Campus, Plot No. DG/02/02,  
Premises No. 14-0358, Action Area-ID, New Town, Kolkata 700156, West Bengal, India.

---

### Table of Contents

|                                                                                         |        |
|-----------------------------------------------------------------------------------------|--------|
| <b>I. General Details</b> .....                                                         | S2     |
| <b>II. Experimental procedures and data</b> .....                                       | S2     |
| 1. Synthesis of macrocycle ( <b>CATMC</b> ).....                                        | S2     |
| 2. Synthesis of <b>CATMC-Pd</b> .....                                                   | S3     |
| 3. General procedure for synthesis of 2-arylindole compounds ( <b>3a-3ah</b> ).....     | S3     |
| 4. Spectral Data of 2-arylindole derivatives.....                                       | S3-S10 |
| <b>III. NMR spectra</b> .....                                                           | S11    |
| 1. <sup>1</sup> H and <sup>13</sup> C spectra of <b>CATMC</b> .....                     | S11    |
| 2. COSY spectrum of <b>CATMC</b> .....                                                  | S12    |
| 3. ROESY spectrum of <b>CATMC</b> .....                                                 | S12    |
| 4. <sup>1</sup> H and <sup>13</sup> C spectra of compound <b>CATMC-Pd</b> .....         | S13    |
| 5. COSY spectrum of <b>CATMC-Pd</b> .....                                               | S14    |
| 6. ROESY spectrum of <b>CATMC-Pd</b> .....                                              | S14    |
| 7. Reaction mixture only with PdCl <sub>2</sub> .....                                   | S15    |
| 8. Reaction mixture with <b>CATMC-Pd</b> .....                                          | S15    |
| 9. GC-MS chromatogram.....                                                              | S16    |
| 10. The equation for calculating the selectivity for C2-phenylindole ( <b>3a</b> )..... | S16    |
| 11. Leaching test:                                                                      |        |
| a. Characterization of <b>CATMC-Pd</b> bound with 4-Methylpyridine .....                | S17    |
| b. ICP-MS data.....                                                                     | S17    |

|                                                                                                               |                |
|---------------------------------------------------------------------------------------------------------------|----------------|
| 12. Table 1S: Comparative table of direct C2-arylation with previous reported catalysts vs. our catalyst..... | S17-S18        |
| <b>IV. References.....</b>                                                                                    | <b>S18-S19</b> |
| 13. <sup>1</sup> H and <sup>13</sup> C Spectra of Synthesized 2-arylindole derivatives.....                   | S19-S53        |
| <b>V. Crystal Information and Structure.....</b>                                                              | <b>S53</b>     |
| ORTEP diagram of <b>CATMC-Pd</b> .....                                                                        | S54            |
| Crystallographic details of the <b>CATMC-Pd</b> crystal.....                                                  | S54-S55        |

## I. General Details

All the starting materials were purchased from commercial sources such as Sigma-Aldrich, Merck, Spectrochem and Alfa Aesar and were used as received without further purification. High resolution mass spectra were measured on Q-Tof micro-MS system by electron spray ionization (ESI) technique. All the NMR experiments were obtained on 300 MHz, 400 MHz and 600 MHz Bruker DPX. The Single Crystal XRD data were collected using Bruker SC-XRD. The absorption spectra were recorded with a Perkin Elmer Lambda 950 UV/VIS-NIR scanning spectrophotometer at 298 K.

## II. Experimental procedures and data

### 1. Synthesis of macrocycle (CATMC)<sup>S1</sup>:

Initially, compound **I** was synthesised by using dibromoethane and 4-hydroxybenzaldehyde as starting materials in ACN solvent in presence of K<sub>2</sub>CO<sub>3</sub> under reflux condition for 24h. Further dehydrobromination reaction occur with catechol in DMF solvent under similar basic condition to provide the corresponding compound **II**. Then macrocycle has been synthesised using high dilution principle as follows-

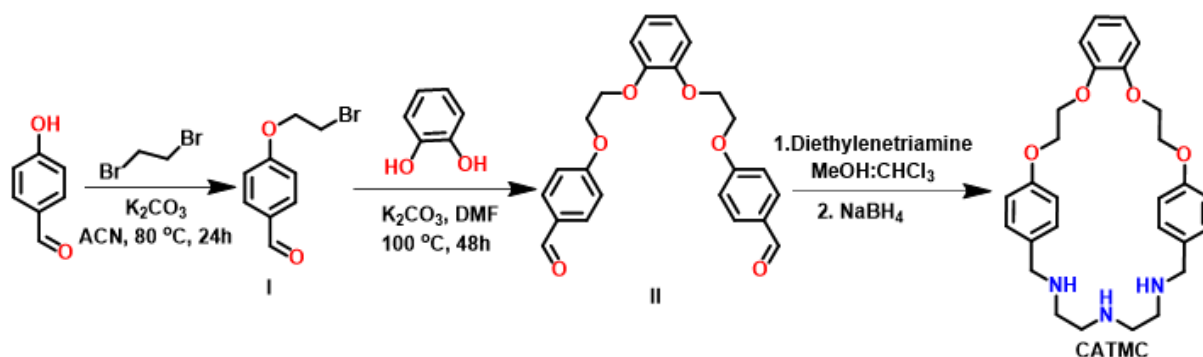

Scheme 1S. Synthesis of **CATMC**

In a 500ml two neck round bottom flask compound **II** (406 mg, 1mmol) was dissolved in CH<sub>2</sub>Cl<sub>2</sub> in a pressure equalizer funnel and in another pressure-equalizing funnel Diethylenetriamine (108  $\mu$ l, 1mmol) was dissolved in CH<sub>3</sub>OH. The reactants were added dropwise to CH<sub>2</sub>Cl<sub>2</sub>-CH<sub>3</sub>OH solvent mixture at stirring condition at room temperature under N<sub>2</sub> for 15h. After complete addition of above reactants, NaBH<sub>4</sub> (113 mg, 3mmol) was added and stirred another 4 hours at room temperature. Then, the reaction mixture was filtered and removed solvent in vacuo. The crude was extracted with CHCl<sub>3</sub> and water. After drying over sodium sulphate, the organic layer was completely evaporated and washed with diethyl ether to get the pure white solid product. Yield 83% (395mg). <sup>1</sup>H-NMR (400 MHz, DMSO-d<sub>6</sub>)  $\delta$  7.15 (4H, d,  $J$ =11.2 Hz), 7.06 (2H, dd,  $J$ = 8.0 Hz, 4.8Hz), 6.94 (2H, dd,  $J$ = 8.0 Hz, 4.8 Hz), 6.80 (4H, d,  $J$ = 11.6 Hz), 4.27-4.23 (8H, m), 3.56 (4H, brs), 2.61 (8H, brs); <sup>13</sup>C-NMR (125 MHz, DMSO-d<sub>6</sub>)  $\delta$  157.8, 149.0, 133.4, 129.6, 122.1, 115.2, 114.6, 68.3, 67.3, 52.7, 48.2, 48.0.

## 2. Synthesis of **CATMC-Pd**:

PdCl<sub>2</sub> (1 mmol) was added to the solution of **CATMC** (1mmol) in ACN and the mixture was stirred at 50-60 °C for 3-4 hours. Then solvent was evaporated and the solid residue was washed with diethyl-ether to get the pale yellowish crystalline **CATMC-Pd**. <sup>1</sup>H-NMR (600 MHz, DMSO-d<sub>6</sub>)  $\delta$  7.74 (4H, d,  $J$ = 8.4 Hz), 7.15 (4H, d,  $J$ = 8.4 Hz), 7.08 (2H, dd,  $J$ = 6.0 Hz, 3.6 Hz), 6.94 (2H, dd,  $J$ = 6.0 Hz, 3.6 Hz), 6.75 (2H, d,  $J$ = 7.8 Hz), 6.34 (1H, t,  $J$ = 10.5 Hz), 4.43 (4H, t,  $J$ = 8.7 Hz), 4.22 (2H, t,  $J$ = 9.0 Hz), 4.16 (2H, t,  $J$ = 9.3 Hz), 4.05 (2H, dd,  $J$ = 12.6 Hz, 2.4 Hz), 3.07 (2H, dd,  $J$ = 12.3 Hz, 2.1 Hz), 2.72 (2H, dd,  $J$ = 24.7 Hz, 11.4 Hz), 2.61 (2H, d,  $J$ = 12.0 Hz), 2.41 – 2.33 (4H, m); <sup>13</sup>C-NMR (125 MHz, DMSO-d<sub>6</sub>)  $\delta$  158.8, 148.6, 133.5, 127.2, 121.7, 115.1, 114.3, 67.3, 66.7, 53.4, 52.5, 52.2.

## 3. General procedure for synthesis of 2-arylidole compounds (3a-3ah):

In a 10mL round bottom flask corresponding indoles (1 mmol) and boronic acids (1.2 mmol) were taken in 2mL of water then **CATMC-Pd** complex (5 mol%) was added and overall reaction mixture was allowed to stir for another 12 h at 50 °C. Then the solvent was evaporated. All the crude products were extracted by chloroform and were purified by column chromatography.

## 4. Spectral Data of 2-arylidole derivatives:

**2-phenyl-1H-indole (3a)**<sup>S2</sup>: White solid (84%); <sup>1</sup>H-NMR (400 MHz, CDCl<sub>3</sub>)  $\delta$  8.34 (1H, brs), 7.70 (3H, d,  $J$ = 7.6Hz), 7.49 (2H, t,  $J$ = 7.8Hz), 7.44 (1H, d,  $J$ = 8Hz), 7.38 (1H, t,  $J$ = 7.2 Hz), 7.26 (1H, t,  $J$ = 7.0 Hz), 7.19 (1H, t,  $J$ = 7.4 Hz), 6.89 (1H, s); <sup>13</sup>C-NMR (101 MHz, CDCl<sub>3</sub>)  $\delta$  137.9, 136.8, 132.4, 129.3, 129.0, 127.7, 125.2, 122.4, 120.7, 120.3, 110.9, 100.0; HRMS (ESI) m/z: [M + H]<sup>+</sup> Calcd for C<sub>14</sub>H<sub>12</sub>N 194.0965; Found 194.0969, m.p. 187-189 °C.

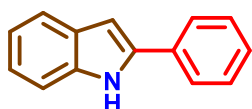

**2-(p-tolyl)-1H-indole (3b)**<sup>S2</sup>: White solid (86%); <sup>1</sup>H-NMR (300 MHz, CDCl<sub>3</sub>) δ 8.31(1H, brs), 7.64 (1H, d, *J* = 7.5 Hz), 7.57 (2H, d, *J* = 8.1 Hz), 7.40 (1H, d, *J* = 8.1 Hz), 7.26 (2H, d, *J* = 7.8 Hz), 7.23-7.11(2H, m), 6.80 (1H, t, *J* = 1.0 Hz), 2.41(3H, s); <sup>13</sup>C-NMR (75 MHz, CDCl<sub>3</sub>) δ 138.2, 137.8, 136.9, 129.9, 129.8, 129.5, 125.2, 122.3, 120.7, 120.4, 111.0, 99.6, 21.4; HRMS (ESI) *m/z*: [M + H]<sup>+</sup> Calcd for C<sub>15</sub>H<sub>14</sub>N 208.1121; Found 208.1128, m.p. 211-213 °C.

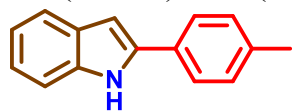

**2-(4-ethylphenyl)-1H-indole (3c)**<sup>S3</sup>: White solid (87%); <sup>1</sup>H-NMR (300 MHz, CDCl<sub>3</sub>) δ 8.31(1H, brs), 7.65 (1H, d, *J* = 7.8 Hz), 7.60 (2H, d, *J* = 8.1 Hz), 7.40 (1H, d, *J* = 8.1 Hz), 7.30 (2H, d, *J* = 8.4 Hz), 7.21(1H, t, *J* = 6.9 Hz), 7.14 (1H, t, *J* = 7.2 Hz), 6.81(1H, d, *J* = 1.8 Hz), 2.71(2H, q, *J* = 7.6 Hz), 1.30 (3H, t, *J* = 7.6 Hz); <sup>13</sup>C-NMR (75 MHz, CDCl<sub>3</sub>) δ 144.2, 138.2, 136.9, 130.0, 129.5, 128.7, 125.3, 122.3, 120.7, 120.3, 111.0, 99.6, 28.8, 15.6; HRMS (ESI) *m/z*: [M + H]<sup>+</sup> Calcd for C<sub>16</sub>H<sub>16</sub>N 222.1278; Found 222.1284, m.p. 194-196 °C.

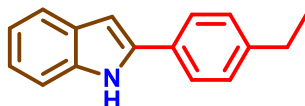

**2-(4-propylphenyl)-1H-indole (3d)**<sup>S4</sup>: White solid (87%); <sup>1</sup>H-NMR (400 MHz, CDCl<sub>3</sub>) δ 8.31(1H, brs), 7.62 (1H, d, *J* = 7.6 Hz), 7.58 (2H, d, *J* = 8 Hz), 7.40 (1H, d, *J* = 8 Hz), 7.25 (2H, t, *J* = 4.0 Hz), 7.17 (1H, t, *J* = 7.2 Hz), 7.11 (1H, t, *J* = 7.2 Hz), 6.78 (1H, s), 2.62(2H, t, *J* = 7.6 Hz), 1.72-1.63 (2H, m), 0.97 (3H, t, *J* = 7.4 Hz); <sup>13</sup>C-NMR (101 MHz, CDCl<sub>3</sub>) δ 142.5, 138.1, 136.7, 129.9, 129.4, 129.1, 125.1, 122.1, 120.5, 120.2, 110.8, 99.4, 37.8, 24.5, 13.8; HRMS (ESI) *m/z*: [M + H]<sup>+</sup> Calcd for C<sub>17</sub>H<sub>18</sub>N 236.1434; Found 236.1440, m.p. 197-199 °C.

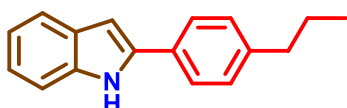

**2-(4-(tert-butyl)phenyl)-1H-indole (3e)**<sup>S5</sup>: White solid (87%); <sup>1</sup>H-NMR (300 MHz, CDCl<sub>3</sub>) δ 8.30 (1H, brs), 7.68(1H, d, *J* = 7.5 Hz), 7.61 (2H, d, *J* = 8.4 Hz), 7.50 (2H, d, *J* = 8.4 Hz), 7.41 (1H, d, *J* = 7.8 Hz), 7.26-7.16 (2H, m), 6.85 (1H, d, 1.5 Hz), 1.41 (9H, s); <sup>13</sup>C-NMR (101 MHz, CDCl<sub>3</sub>) δ 150.9, 138.0, 136.8, 129.6, 129.4, 126.0, 125.0, 122.2, 120.6, 120.2, 110.9, 99.6, 34.7, 31.4; HRMS (ESI) *m/z*: [M + H]<sup>+</sup> Calcd for C<sub>18</sub>H<sub>20</sub>N 250.1591; Found 250.1596, m.p. 186-189 °C.

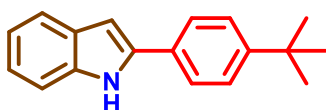

**2-(3,5-dimethylphenyl)-1H-indole (3f)**<sup>S6</sup>: White solid (86%); <sup>1</sup>H-NMR (400 MHz, CDCl<sub>3</sub>) δ 8.33 (1H, brs), 7.62 (1H, d, *J* = 8 Hz), 7.39(1H, d, *J* = 8 Hz), 7.30(2H, s), 7.18(1H, t, *J* = 7.6 Hz), 7.11(1H, t, *J* = 7.4 Hz), 6.98(1H, s), 6.80(1H, s), 2.39 (6H, s); <sup>13</sup>C-NMR (101 MHz, CDCl<sub>3</sub>) δ 138.6, 136.7,

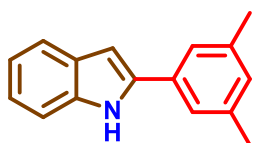

132.2, 129.5, 129.3, 125.0, 123.1, 122.2, 120.6, 120.2, 110.8, 99.8, 21.4; HRMS (ESI)  $m/z$ :  $[M + H]^+$  Calcd for  $C_{16}H_{16}N$  222.1278; Found 222.1283, m.p. 116-118 °C.

**2-(4-phenoxyphenyl)-1H-indole (3g)**<sup>S7</sup>: White crystalline (88%); <sup>1</sup>H-NMR (400 MHz,  $CDCl_3$ )  $\delta$  8.29 (1H, brs), 7.63 (3H, d,  $J = 8.8$  Hz), 7.38 (3H, dd,  $J = 13.6$  Hz,  $J = 8$  Hz), 7.21-7.06 (7H, m), 6.76 (1H, s); <sup>13</sup>C-NMR (101 MHz,  $CDCl_3$ )  $\delta$  157.1, 156.9, 136.8, 129.9, 129.4, 127.6, 126.6, 123.6, 122.2, 120.5, 120.3, 119.2, 119.2, 110.8, 99.6; HRMS (ESI)  $m/z$ :  $[M + H]^+$  Calcd for  $C_{20}H_{16}NO$  286.1227; Found 286.1230, m.p. 168-170 °C.

**2-(3,5-difluorophenyl)-1H-indole (3h)**<sup>S8</sup>: White crystalline (82%); <sup>1</sup>H-NMR (300 MHz,  $CDCl_3$ )  $\delta$  8.32 (1H, brs), 7.65 (1H, d,  $J = 8.1$  Hz), 7.41 (1H, d,  $J = 8.4$  Hz), 7.27-7.24 (1H, m), 7.22-7.14 (3H, m), 6.86 (1H, brs), 6.80-6.72 (1H, m); <sup>13</sup>C-NMR (75 MHz,  $CDCl_3$ )  $\delta$  165.2, 137.2, 135.7, 129.0, 123.4, 121.2, 120.8, 111.2, 108.2, 107.8, 102.9, 101.9; HRMS (ESI)  $m/z$ :  $[M + H]^+$  Calcd for  $C_{14}H_{10}F_2N$  230.0776; Found 230.0782, m.p. 125-127 °C.

**2-(4-(trifluoromethyl)phenyl)-1H-indole (3i)**<sup>S2</sup>: White crystalline (85%); <sup>1</sup>H-NMR (300 MHz,  $CDCl_3$ )  $\delta$  8.36 (1H, brs), 7.76 (2H, d,  $J = 8.1$  Hz), 7.70-7.64 (3H, m), 7.43 (1H, d,  $J = 8.1$  Hz), 7.27-7.22 (1H, m), 7.15 (1H, t,  $J = 7.5$  Hz), 6.93 (1H, d,  $J = 1.2$  Hz); <sup>13</sup>C-NMR (101 MHz,  $CDCl_3$ )  $\delta$  137.2, 136.1, 135.7, 129.0, 126.1, 126.0, 125.1, 123.2, 121.1, 120.7, 111.1, 101.7; HRMS (ESI)  $m/z$ :  $[M + H]^+$  Calcd for  $C_{15}H_{11}F_3N$  262.0838; Found 262.0835, m.p. 233-235 °C.

**2-(3-nitrophenyl)-1H-indole (3j)**<sup>S9</sup>: Yellowish crystalline (83%); <sup>1</sup>H-NMR (400 MHz,  $DMSO-d_6$ )  $\delta$  11.63 (1H, brs), 8.47 (1H, s), 8.17 (1H, d,  $J = 7.6$  Hz), 8.06 (1H, d,  $J = 8.4$  Hz), 7.97 (1H, d,  $J = 2.4$  Hz), 7.92 (1H, d,  $J = 7.6$  Hz), 7.71 (1H, t,  $J = 8$  Hz), 7.50 (1H, d,  $J = 8$  Hz), 7.23-7.16 (2H, m); <sup>13</sup>C-NMR (151 MHz,  $CDCl_3$ )  $\delta$  148.8, 137.4, 136.7, 133.0, 129.6, 125.2, 123.0, 122.7, 121.8, 121.0, 120.6, 119.3, 116.2, 111.7; HRMS (ESI)  $m/z$ :  $[M + H]^+$  Calcd for  $C_{14}H_{11}N_2O_2$  239.0815; Found 239.0819, m.p. 164-167 °C.

**2-(naphthalen-2-yl)-1H-indole (3k)**<sup>S2</sup>: White crystalline (86%); <sup>1</sup>H-NMR (300 MHz,  $CDCl_3$ )  $\delta$  8.49 (1H, brs), 8.05 (1H, s), 7.92-7.81 (4H, m), 7.68 (1H, d,  $J = 7.8$  Hz), 7.55-7.42 (3H, m), 7.26-7.13 (2H, m), 6.97 (1H, d,  $J = 1.5$  Hz); <sup>13</sup>C-NMR (75 MHz,  $CDCl_3$ )  $\delta$  137.9, 137.1, 133.7, 132.9,

129.8, 129.4, 128.8, 128.1, 127.9, 126.8, 126.2, 123.9, 123.1, 122.6, 120.8, 120.4, 111.0, 100.8; HRMS (ESI) m/z: [M + H]<sup>+</sup> Calcd for C<sub>18</sub>H<sub>14</sub>N 244.1121; Found 244.1126, m.p. 194-196 °C.

**5-methyl-2-phenyl-1H-indole (3l)**<sup>S2</sup>: White solid (85%); <sup>1</sup>H-NMR (400 MHz, CDCl<sub>3</sub>)

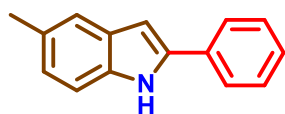

δ 8.27 (1H, brs), 7.68 (2H, d, *J* = 7.6 Hz), 7.49-7.47 (3H, m), 7.38-7.28 (2H, m), 7.07 (1H, d, *J* = 8.4 Hz), 6.80 (1H, s), 2.50 (3H, s); <sup>13</sup>C-NMR (101 MHz, CDCl<sub>3</sub>) δ 138.0, 135.2, 132.5, 129.6, 129.5, 129.0,

127.6, 125.1, 124.0, 120.3, 110.6, 99.6, 21.5; HRMS (ESI) m/z: [M + H]<sup>+</sup> Calcd for C<sub>15</sub>H<sub>14</sub>N 208.1121; Found 208.1124, m.p. 216-219 °C.

**6-methyl-2-phenyl-1H-indole (3m)**<sup>S10</sup>: White solid (84%); <sup>1</sup>H-NMR (300 MHz,

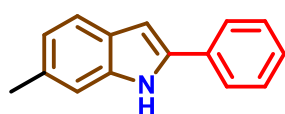

CDCl<sub>3</sub>) δ 8.18 (1H, brs), 7.65 (2H, d, *J* = 7.5 Hz), 7.52 (1H, d, *J* = 7.8 Hz), 7.44 (2H, t, *J* = 7.6 Hz), 7.31 (1H, t, *J* = 6.9 Hz), 7.19 (1H, s), 6.97 (1H, d, *J* = 8.1 Hz), 6.79 (1H, s), 2.48 (3H, s); <sup>13</sup>C-NMR (75 MHz,

CDCl<sub>3</sub>) δ 137.4, 137.3, 132.6, 132.3, 129.1, 127.5, 127.2, 125.0, 122.1, 120.4, 110.9, 99.9, 21.9; HRMS (ESI) m/z: [M + H]<sup>+</sup> Calcd for C<sub>15</sub>H<sub>14</sub>N 208.1121; Found 208.1125, m.p. 193-195 °C.

**6-methoxy-2-phenyl-1H-indole (3n)**<sup>S10</sup>: White solid (83%); <sup>1</sup>H-NMR (400 MHz,

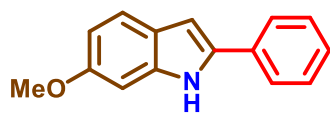

CDCl<sub>3</sub>) δ 8.25 (1H, brs), 7.65 (2H, d, *J* = 7.6 Hz), 7.52 (1H, d, *J* = 8.4 Hz), 7.45 (2H, t, *J* = 7.6 Hz), 7.32 (1H, t, *J* = 7.6 Hz), 6.93 (1H, s), 6.83 (1H, dd, *J* = 8.4 Hz, *J* = 2.4 Hz), 6.79 (1H, s), 3.89 (3H, s);

<sup>13</sup>C NMR (101 MHz, CDCl<sub>3</sub>) δ 156.7, 137.7, 136.8, 132.6, 129.0, 127.3, 124.7, 123.6, 121.3, 110.2, 99.9, 94.5, 55.7; HRMS (ESI) m/z: [M + H]<sup>+</sup> Calcd for C<sub>15</sub>H<sub>14</sub>NO 224.1070; Found 224.1074, m.p. 162-164 °C.

**6-fluoro-2-phenyl-1H-indole (3o)**<sup>S10</sup>: White crystalline (88%); <sup>1</sup>H NMR (300 MHz,

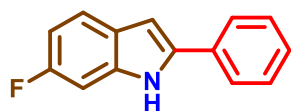

CDCl<sub>3</sub>) δ 8.31 (1H, brs), 7.63 (2H, d, *J* = 7.2 Hz), 7.53 (1H, dd, *J* = 8.7 Hz, 5.4 Hz), 7.45 (2H, t, *J* = 7.5 Hz), 7.33 (1H, t, *J* = 7.4 Hz), 7.08 (1H, dd, *J* = 9.6 Hz, 2.2 Hz), 6.93-6.86 (1H, m), 6.79 (1H, dd, *J* = 2.2

Hz, 0.8 Hz); <sup>13</sup>C-NMR (75 MHz, CDCl<sub>3</sub>) δ 161.7, 158.6, 136.9, 136.7, 132.2, 129.1, 127.8, 125.9, 125.0, 121.5, 121.4, 109.3, 108.9, 99.9, 97.5, 97.2; HRMS (ESI) m/z: [M + H]<sup>+</sup> Calcd for C<sub>14</sub>H<sub>11</sub>FN 212.0870; Found 212.0866, m.p. 175-187 °C.

**5-bromo-2-phenyl-1H-indole (3p)**<sup>S11</sup>: White solid (86%); <sup>1</sup>H NMR (300 MHz, CDCl<sub>3</sub>) δ 8.36 (1H, brs), 7.69-7.63 (2H, m), 7.44 (3H, dd, *J* = 15.6 Hz, 7.8 Hz), 7.33 (1H, dd, *J* = 8.4 Hz, 6.3 Hz), 7.19 (1H, dd, *J* = 8.1 Hz, 1.2 Hz), 7.15-7.10 (1H, m), 6.84 (1H, d, *J* = 1.8 Hz); <sup>13</sup>C-NMR (101 MHz, CDCl<sub>3</sub>) δ 137.9, 136.8, 132.4, 129.3, 129.0, 127.7, 125.2, 122.4, 120.7, 120.3, 110.9, 100.0; HRMS (ESI) *m/z*: [M + H]<sup>+</sup> Calcd for C<sub>14</sub>H<sub>11</sub>BrN 272.0069 (for <sup>79</sup>Br) and 274.0049 (for <sup>81</sup>Br); Found 272.0076 (for <sup>79</sup>Br) and 274.0056 (for <sup>79</sup>Br), m.p. 191-193 °C.

**Methyl 2-phenyl-1H-indole-5-carboxylate (3q)**<sup>S2</sup>: White solid (89%); <sup>1</sup>H NMR (400 MHz, CDCl<sub>3</sub>) δ 8.62 (s, 1H), 8.40 (s, 1H), 7.91 (d, *J* = 8.4 Hz, 1H), 7.68 (d, *J* = 7.5 Hz, 2H), 7.46 (t, *J* = 7.5 Hz, 2H), 7.41 (d, *J* = 8.5 Hz, 1H), 7.36 (t, *J* = 7.2 Hz, 1H), 6.90 (s, 1H), 3.95 (s, 3H); <sup>13</sup>C-NMR (101 MHz, CDCl<sub>3</sub>) δ 168.2, 139.4, 139.3, 131.8, 129.1, 128.8, 128.2, 125.3, 123.8, 123.6, 122.4, 110.6, 101.0, 51.9; HRMS (ESI) *m/z*: [M + H]<sup>+</sup> Calcd for C<sub>16</sub>H<sub>14</sub>NO<sub>2</sub> 252.1019; Found 252.1026, m.p. 185-188 °C.

**2-phenyl-1H-indole-5-carbonitrile (3r)**<sup>S11</sup>: White solid (90%); <sup>1</sup>H NMR (400 MHz, CDCl<sub>3</sub>) δ 8.74 (s, 1H), 7.97 (s, 1H), 7.68 (d, *J* = 7.5 Hz, 2H), 7.51 – 7.37 (m, 5H), 6.87 (s, 1H); <sup>13</sup>C-NMR (75 MHz, CDCl<sub>3</sub>) δ 140.4, 138.5, 131.3, 129.3, 129.1, 128.7, 126.1, 125.5, 125.3, 120.8, 111.8, 103.4, 100.3; HRMS (ESI) *m/z*: [M + H]<sup>+</sup> Calcd for C<sub>15</sub>H<sub>11</sub>N<sub>2</sub> 219.0917; Found 219.0930, m.p. 194-196 °C.

**2-phenyl-1H-indole-6-carbonitrile (3s)**<sup>S12</sup>: White solid (88%); <sup>1</sup>H NMR (400 MHz, CDCl<sub>3</sub>) δ 8.67 (s, 1H), 7.74 (s, 1H), 7.69 (t, *J* = 8.7 Hz, 3H), 7.49 (t, *J* = 7.5 Hz, 2H), 7.41 (t, *J* = 6.9 Hz, 1H), 7.36 (d, *J* = 8.2 Hz, 1H), 6.88 (s, 1H); <sup>13</sup>C NMR (101 MHz, CDCl<sub>3</sub>) δ 141.8, 135.5, 132.5, 131.2, 129.3, 128.9, 125.6, 123.4, 121.3, 120.7, 115.6, 104.4, 100.5; HRMS (ESI) *m/z*: [M + H]<sup>+</sup> Calcd for C<sub>15</sub>H<sub>11</sub>N<sub>2</sub> 219.0917; Found 219.0926, m.p. 232-234 °C.

**5-nitro-2-phenyl-1H-indole (3t)**<sup>S11</sup>: Yellowish crystalline (92%); <sup>1</sup>H NMR (400 MHz, CDCl<sub>3</sub>) δ 8.74 (s, 1H), 8.59 (d, *J* = 2.0 Hz, 1H), 8.12 (dd, *J* = 8.9, 2.2 Hz, 1H), 7.72 – 7.66 (m, 2H), 7.50 (t, *J* = 7.6 Hz, 2H), 7.46 – 7.39 (m, 2H), 6.97 (d, *J* = 1.4 Hz, 1H); <sup>13</sup>C-NMR (101 MHz, CDCl<sub>3</sub>) δ 142.3, 141.2, 139.7, 131.1, 129.3, 128.8, 128.6, 125.4, 118.0, 117.7, 110.8, 101.7; HRMS (ESI) *m/z*: [M + H]<sup>+</sup> Calcd for C<sub>14</sub>H<sub>11</sub>N<sub>2</sub>O<sub>2</sub> 239.0815; Found 239.0826, m.p. 233-235 °C.

**2-(4-(tert-butyl)phenyl)-5-methyl-1H-indole (3u)**<sup>S13</sup>: White solid (86%); <sup>1</sup>H NMR (400 MHz, CDCl<sub>3</sub>) δ 8.22 (s, 1H), 7.59 (d, *J* = 8.2 Hz, 2H), 7.46 (d, *J* = 8.2 Hz, 2H), 7.41 (s, 1H), 7.29 (d, *J* = 8.2 Hz, 1H), 7.01 (d, *J* = 8.0 Hz, 1H), 6.72 (s, 1H), 2.46 (s, 3H), 1.37 (s, 9H); <sup>13</sup>C-NMR (101 MHz, CDCl<sub>3</sub>) δ 150.8, 138.1, 135.1, 129.7, 129.4, 125.9, 124.8, 123.7, 120.2, 110.5, 99.1, 34.7, 31.3, 21.5; HRMS (ESI) *m/z*: [M + H]<sup>+</sup> Calcd for C<sub>19</sub>H<sub>22</sub>N 264.1747; Found 264.1741, m.p. 218-220 °C.

**2-(4-ethylphenyl)-5-methoxy-1H-indole (3v)**: White solid (83%); <sup>1</sup>H NMR (300 MHz, CDCl<sub>3</sub>) δ 8.21 (s, 1H), 7.57 – 7.49 (m, 2H), 7.24 (d, *J* = 7.9 Hz, 3H), 7.06 (d, *J* = 2.3 Hz, 1H), 6.82 (dd, *J* = 8.8, 2.3 Hz, 1H), 6.70 (d, *J* = 1.4 Hz, 1H), 3.84 (s, 3H), 2.67 (q, *J* = 7.6 Hz, 2H), 1.25 (t, *J* = 7.6 Hz, 3H); <sup>13</sup>C-NMR (75 MHz, CDCl<sub>3</sub>) δ 154.6, 144.1, 140.0, 132.1, 130.0, 128.6, 125.2, 112.4, 111.7, 102.4, 99.4, 56.0, 28.8, 15.6; HRMS (ESI) *m/z*: [M + H]<sup>+</sup> Calcd for C<sub>17</sub>H<sub>18</sub>NO 252.1383; Found 252.1391, m.p. 154-156 °C.

**2-(4-(tert-butyl)phenyl)-5-methoxy-1H-indole (3w)**<sup>S14</sup>: White solid (84%); <sup>1</sup>H NMR (400 MHz, CDCl<sub>3</sub>) δ 8.24 (s, 1H), 7.58 (d, *J* = 8.4 Hz, 2H), 7.46 (d, *J* = 8.4 Hz, 2H), 7.27 (d, *J* = 8.9 Hz, 1H), 7.11 (d, *J* = 1.9 Hz, 1H), 6.86 (dd, *J* = 8.7, 2.3 Hz, 1H), 6.74 (s, 1H), 3.88 (s, 3H), 1.37 (s, 9H); <sup>13</sup>C-NMR (75 MHz, CDCl<sub>3</sub>) δ 154.6, 151.0, 138.9, 132.1, 130.0, 129.8, 126.1, 125.0, 112.5, 111.7, 102.4, 99.5, 56.0, 34.8, 31.4; HRMS (ESI) *m/z*: [M + H]<sup>+</sup> Calcd for C<sub>19</sub>H<sub>22</sub>NO 280.1696; Found 280.1688, m.p. 248-250 °C.

**2-(3-fluorophenyl)-5-methoxy-1H-indole (3x)**: White crystalline (82%); <sup>1</sup>H NMR (300 MHz, CDCl<sub>3</sub>) δ 8.21 (s, 1H), 7.39 (t, *J* = 5.3 Hz, 2H), 7.32 (dd, *J* = 17.1, 5.3 Hz, 2H), 7.09 (d, *J* = 2.3 Hz, 1H), 7.05 – 6.96 (m, 1H), 6.88 (dd, *J* = 8.8, 2.5 Hz, 1H), 6.77 (d, *J* = 1.7 Hz, 1H), 3.87 (s, 3H); <sup>13</sup>C-NMR (75 MHz, CDCl<sub>3</sub>) δ 161.9; 154.8, 137.4, 134.8, 132.2, 130.8, 129.7, 120.7, 114.6, 114.3, 113.4, 112.2, 111.9, 102.4, 100.8, 56.0; HRMS (ESI) *m/z*: [M + H]<sup>+</sup> Calcd for C<sub>15</sub>H<sub>13</sub>FNO 242.0976; Found 242.0981, m.p. 126-128 °C.

**2-(2-fluorophenyl)-5-methoxy-1H-indole (3y)**: White crystalline (80%); <sup>1</sup>H NMR (300 MHz, CDCl<sub>3</sub>) δ 8.79 (s, 1H), 7.77 (td, *J* = 7.7, 1.9 Hz, 1H), 7.31 (d, *J* = 8.8 Hz, 1H), 7.26 – 7.13 (m, 3H), 7.10 (d, *J* = 2.4 Hz, 1H), 6.92 – 6.86 (m, 2H), 3.87 (s, 3H); <sup>13</sup>C-NMR (75 MHz, CDCl<sub>3</sub>) δ 154.6, 132.0, 128.9, 128.8, 128.0, 128.0, 124.9, 116.8, 116.5, 113.4, 111.9, 102.1, 101.5,



56.0; HRMS (ESI)  $m/z$ :  $[M + H]^+$  Calcd for  $C_{15}H_{13}FNO$  242.0976; Found 242.0979, m.p. 123-125 °C.

**5-fluoro-2-(*m*-tolyl)-1H-indole (3z):** White solid (88%);  $^1H$  NMR (400 MHz,  $CDCl_3$ )  $\delta$  8.32 (s, 1H), 7.46 (d,  $J = 11.2$  Hz, 2H), 7.31 (ddd,  $J = 10.2, 9.4, 4.9$  Hz, 3H), 7.16 (d,  $J = 7.5$  Hz, 1H), 6.93 (td,  $J = 9.1, 2.4$  Hz, 1H), 6.77 (s, 1H), 2.43 (s, 3H);  $^{13}C$ -NMR (101 MHz,  $CDCl_3$ )  $\delta$  159.4, 157.0, 139.8, 138.8, 133.3, 132.0, 129.0, 128.9, 125.9, 122.4, 111.5, 110.6, 110.4, 105.5, 105.3, 99.9, 21.5; HRMS (ESI)  $m/z$ :  $[M + H]^+$  Calcd for  $C_{15}H_{13}FN$  226.1027; Found 226.1033, m.p. 178-180 °C.

**2-(4-(*tert*-butyl)phenyl)-5-fluoro-1H-indole (3aa):** White crystalline (89%);  $^1H$  NMR (400 MHz,  $CDCl_3$ )  $\delta$  8.32 (s, 1H), 7.61 (d,  $J = 8.3$  Hz, 2H), 7.50 (d,  $J = 8.4$  Hz, 2H), 7.30 (ddd,  $J = 9.6, 7.2, 3.3$  Hz, 2H), 6.95 (td,  $J = 9.1, 2.4$  Hz, 1H), 6.77 (s, 1H), 1.39 (s, 9H);  $^{13}C$ -NMR (101 MHz,  $CDCl_3$ )  $\delta$  159.4, 157.0, 151.3, 139.8, 133.2, 129.8, 129.5, 129.2, 126.0, 125.0, 111.4, 110.5, 110.2, 105.4, 105.2, 99.6, 34.7, 31.3; HRMS (ESI)  $m/z$ :  $[M + H]^+$  Calcd for  $C_{18}H_{19}FN$  268.1496; Found 268.1492, m.p. 212-214 °C.

**5-bromo-2-(*p*-tolyl)-1H-indole (3ab)<sup>S15</sup>:** White solid (87%);  $^1H$  NMR (400 MHz,  $DMSO-d_6$ )  $\delta$  11.68 (s, 1H), 7.74 (d,  $J = 7.9$  Hz, 2H), 7.68 (s, 1H), 7.34 (d,  $J = 8.5$  Hz, 1H), 7.28 (d,  $J = 7.8$  Hz, 2H), 7.18 (d,  $J = 8.5$  Hz, 1H), 6.83 (s, 1H), 2.34 (s, 3H);  $^{13}C$ -NMR (101 MHz,  $DMSO-d_6$ )  $\delta$  139.3, 137.3, 135.6, 130.6, 129.5, 128.9, 125.1, 123.7, 121.9, 113.1, 111.7, 97.6, 20.8; HRMS (ESI)  $m/z$ :  $[M + H]^+$  Calcd for  $C_{15}H_{13}BrN$  286.0226 (for  $^{79}Br$ ) and 288.0205 (for  $^{81}Br$ ); Found 286.0233 (for  $^{79}Br$ ) and 288.0212 (for  $^{81}Br$ ), m.p. 239-241 °C.

**Methyl 2-(*m*-tolyl)-1H-indole-5-carboxylate (3ac):** White solid (90%);  $^1H$  NMR (300 MHz,  $CDCl_3$ )  $\delta$  8.59 (s, 1H), 8.39 (s, 1H), 7.90 (dd,  $J = 8.4, 1.5$  Hz, 1H), 7.48 (d,  $J = 8.8$  Hz, 2H), 7.43 – 7.30 (m, 2H), 7.17 (d,  $J = 8.7$  Hz, 1H), 6.88 (d,  $J = 1.5$  Hz, 1H), 3.94 (s, 3H), 2.43 (s, 3H);  $^{13}C$ -NMR (101 MHz,  $CDCl_3$ )  $\delta$  168.2, 139.5, 139.3, 138.8, 131.7, 129.0, 128.9, 126.0, 123.7, 123.5, 122.4, 122.3, 110.5, 100.8, 51.9, 21.5; HRMS (ESI)  $m/z$ :  $[M + H]^+$  Calcd for  $C_{17}H_{16}NO_2$  266.1176; Found 266.1187, m.p. 164-166 °C.

**2-(4-methoxyphenyl)-1H-indole-5-carbonitrile (3ad)<sup>S5</sup>:** White solid (90%);  $^1H$  NMR (300 MHz,  $CDCl_3$ )  $\delta$  8.65 (s, 1H), 7.93 (s, 1H), 7.60 (d,  $J = 8.9$  Hz, 2H), 7.46 – 7.37 (m, 2H), 7.00 (d,  $J = 8.8$  Hz, 2H), 6.76 (d,  $J = 1.7$  Hz, 1H), 3.87 (s, 3H);  $^{13}C$ -NMR (75 MHz,

CDCl<sub>3</sub>)  $\delta$  160.2, 140.4, 138.4, 129.3, 127.0, 125.8, 125.0, 124.0, 120.9, 114.8, 111.6, 103.4, 99.2, 55.6; HRMS (ESI)  $m/z$ : [M + H]<sup>+</sup> Calcd for C<sub>16</sub>H<sub>13</sub>N<sub>2</sub>O 249.1022; Found 249.1044, m.p. 210-212 °C.

**2-(m-tolyl)-1H-indole-5-carbonitrile (3ae):** White solid (91%); <sup>1</sup>H NMR (300 MHz, CDCl<sub>3</sub>)  $\delta$  9.04 (s, 1H), 7.94 (s, 1H), 7.42 (ddd,  $J$  = 22.3, 17.5, 9.5 Hz, 5H), 7.20 (d,  $J$  = 8.2 Hz, 1H), 6.84 (d,  $J$  = 1.6 Hz, 1H), 2.43 (s, 3H); <sup>13</sup>C-NMR (75 MHz, CDCl<sub>3</sub>)  $\delta$  140.7, 139.1, 138.7, 131.3, 129.6, 129.2, 129.1, 126.3, 126.1, 125.1, 122.7, 121.2, 112.0, 103.0, 100.0, 21.7; HRMS (ESI)  $m/z$ : [M + H]<sup>+</sup> Calcd for C<sub>16</sub>H<sub>13</sub>N<sub>2</sub> 233.1073; Found 233.1092, m.p. 229-231 °C.

**2-(p-tolyl)-1H-indole-5-carbonitrile (3af):** White solid (91%); <sup>1</sup>H NMR (300 MHz, CDCl<sub>3</sub>)  $\delta$  8.76 (s, 1H), 7.94 (s, 1H), 7.57 (d,  $J$  = 8.1 Hz, 2H), 7.46 – 7.38 (m, 2H), 7.28 (d,  $J$  = 8.1 Hz, 2H), 6.82 (d,  $J$  = 1.8 Hz, 1H), 2.41 (s, 3H); <sup>13</sup>C-NMR (75 MHz, CDCl<sub>3</sub>)  $\delta$  140.6, 138.9, 138.4, 130.0, 129.2, 125.9, 125.4, 125.1, 111.7, 103.3, 99.7, 21.4; HRMS (ESI)  $m/z$ : [M + H]<sup>+</sup> Calcd for C<sub>16</sub>H<sub>13</sub>N<sub>2</sub> 233.1073; Found 233.1093, m.p. 207-209 °C.

**5-nitro-2-(m-tolyl)-1H-indole (3ag):** Yellowish solid (93%); <sup>1</sup>H NMR (400 MHz, CDCl<sub>3</sub>)  $\delta$  8.81 (s, 1H), 8.58 (s, 1H), 8.10 (dd,  $J$  = 8.9, 1.8 Hz, 1H), 7.49 (d,  $J$  = 11.6 Hz, 2H), 7.41 (dd,  $J$  = 16.8, 8.3 Hz, 2H), 7.22 (d,  $J$  = 7.4 Hz, 1H), 6.95 (s, 1H), 2.45 (s, 3H); <sup>13</sup>C-NMR (101 MHz, CDCl<sub>3</sub>)  $\delta$  142.2, 141.3, 139.6, 139.1, 131.0, 129.6, 129.2, 128.6, 126.1, 122.6, 117.9, 117.6, 110.7, 101.5, 21.5; HRMS (ESI)  $m/z$ : [M + H]<sup>+</sup> Calcd for C<sub>15</sub>H<sub>13</sub>N<sub>2</sub>O<sub>2</sub> 253.0972; Found 253.0991, m.p. 194-196 °C.

**2-(4-(tert-butyl)phenyl)-5-nitro-1H-indole (3ah):** Yellowish crystalline (93%); <sup>1</sup>H NMR (400 MHz, CDCl<sub>3</sub>)  $\delta$  8.82 (s, 1H), 8.57 (s, 1H), 8.10 (dd,  $J$  = 8.9, 1.6 Hz, 1H), 7.63 (d,  $J$  = 8.2 Hz, 2H), 7.51 (d,  $J$  = 8.2 Hz, 2H), 7.43 (d,  $J$  = 8.9 Hz, 1H), 6.93 (s, 1H), 1.37 (s, 9H); <sup>13</sup>C-NMR (101 MHz, CDCl<sub>3</sub>)  $\delta$  152.2, 142.2, 141.3, 139.7, 128.7, 128.2, 126.2, 125.2, 117.8, 117.5, 110.7, 101.2, 34.8, 31.2; HRMS (ESI)  $m/z$ : [M + H]<sup>+</sup> Calcd for C<sub>18</sub>H<sub>19</sub>N<sub>2</sub>O<sub>2</sub> 295.1441; Found 295.1463, m.p. 201-203 °C.

### III. NMR spectra:

#### 1. $^1\text{H}$ and $^{13}\text{C}$ spectra of CATMC:

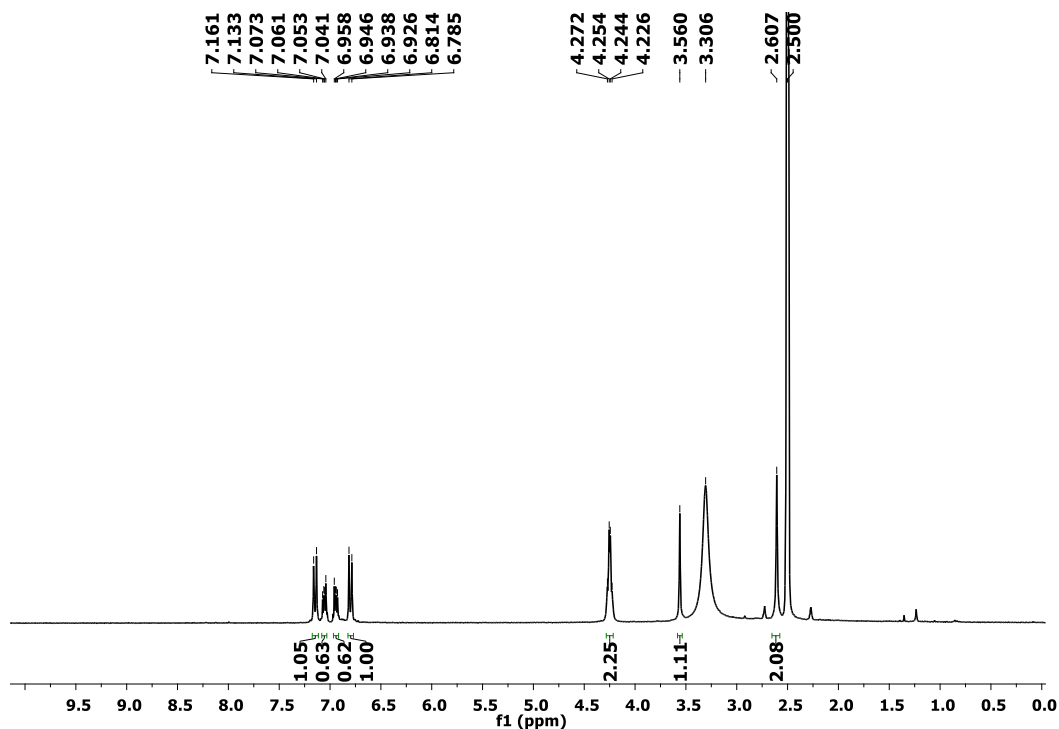

Figure 1S. 400 MHz  $^1\text{H}$ -NMR spectrum of compound CATMC in DMSO- $\text{d}_6$

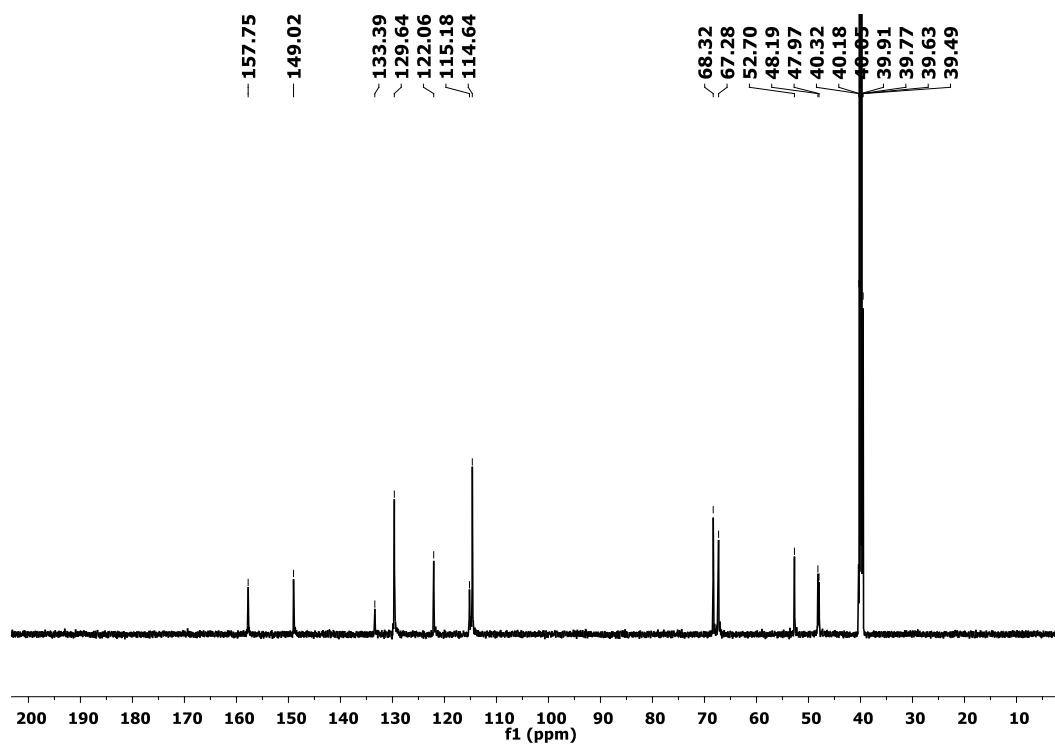

Figure 2S. 125 MHz  $^{13}\text{C}$ -NMR spectrum of compound CATMC in DMSO- $\text{d}_6$

## 2. COSY spectrum of CATMC:

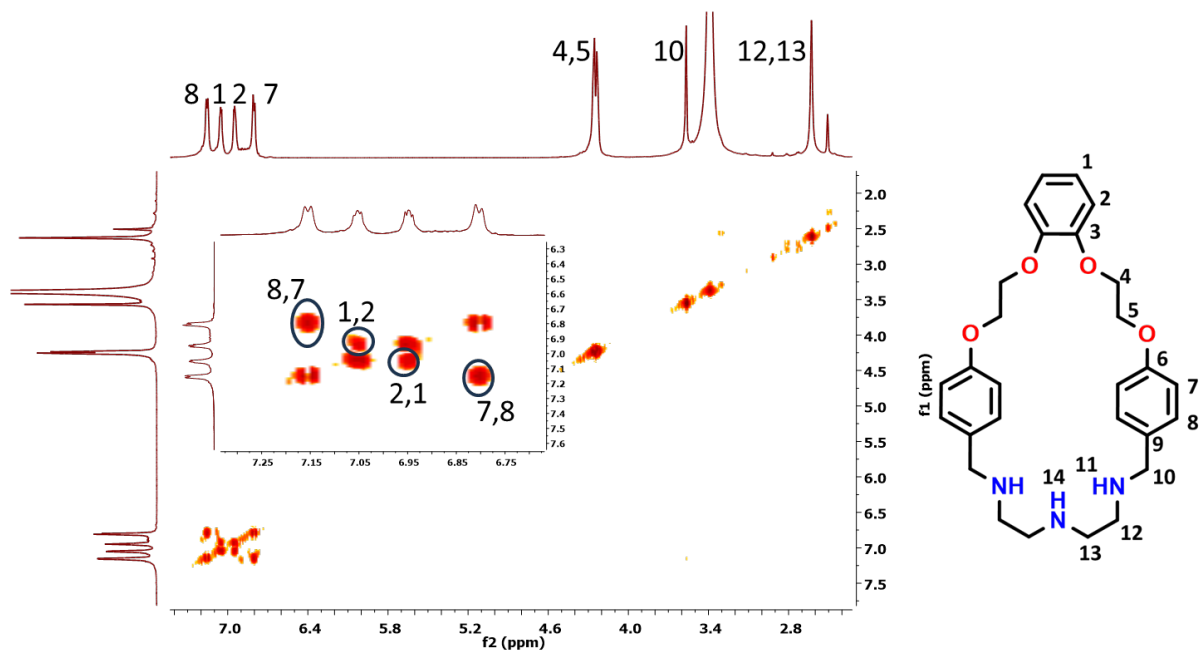

Figure 3S. 600 MHz COSY spectrum of CATMC in DMSO-d<sub>6</sub>

## 3. ROESY spectrum of CATMC:

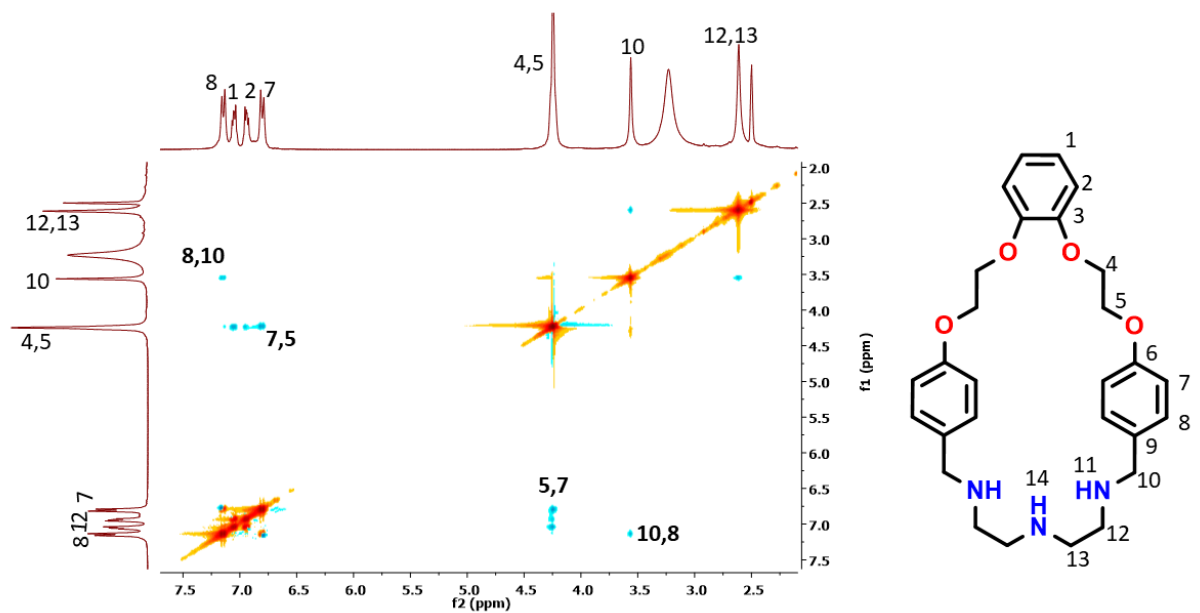

Figure 4S. 300 MHz ROESY spectrum of CATMC in DMSO-d<sub>6</sub>

4.  $^1\text{H}$  and  $^{13}\text{C}$  spectra of compound **CATMC-Pd**:

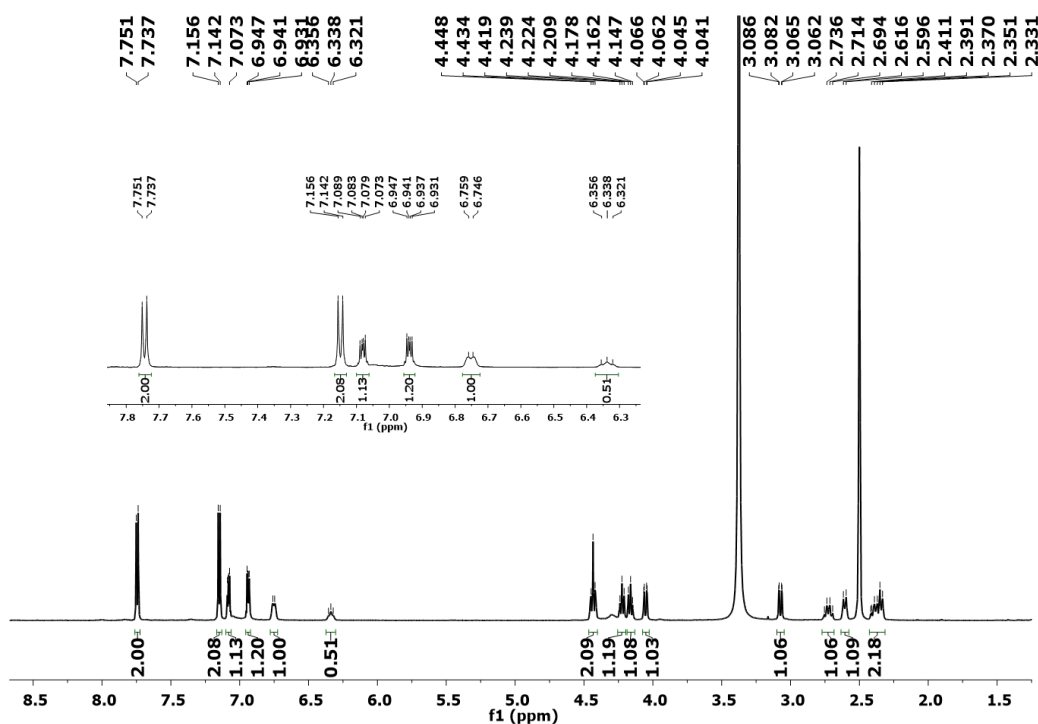

Figure 5S. 600 MHz  $^1\text{H}$ -NMR spectrum of compound **CATMC-Pd** in  $\text{DMSO-d}_6$

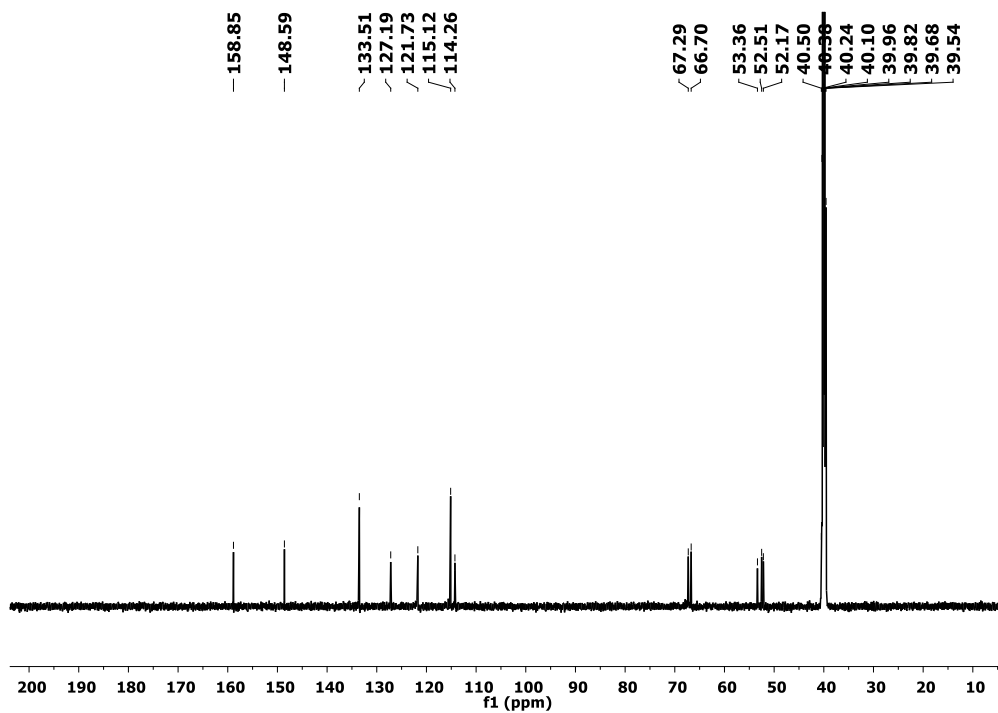

Figure 6S. 125 MHz  $^{13}\text{C}$ -NMR spectrum of compound **CATMC-Pd** in  $\text{DMSO-d}_6$

5. COSY spectrum of **CATMC-Pd**:

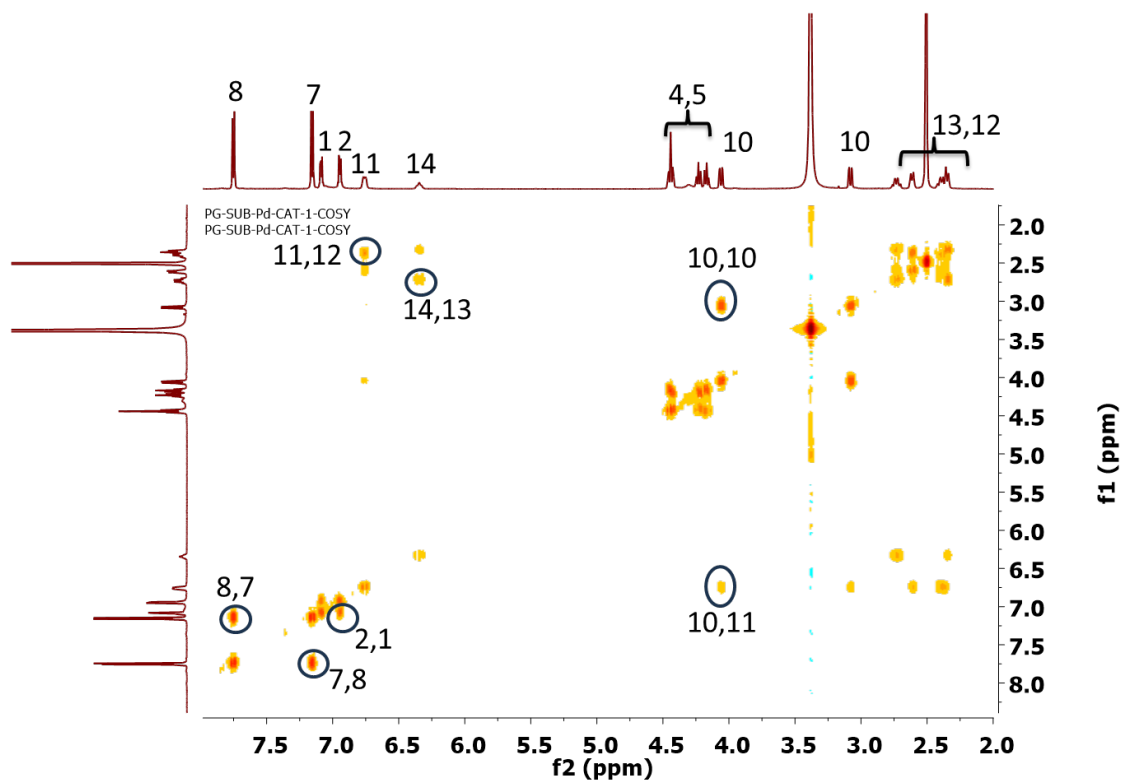

Figure 7S. 600 MHz COSY spectrum of **CATMC-Pd** in DMSO-d<sub>6</sub>

6. ROESY spectrum of **CATMC-Pd**:

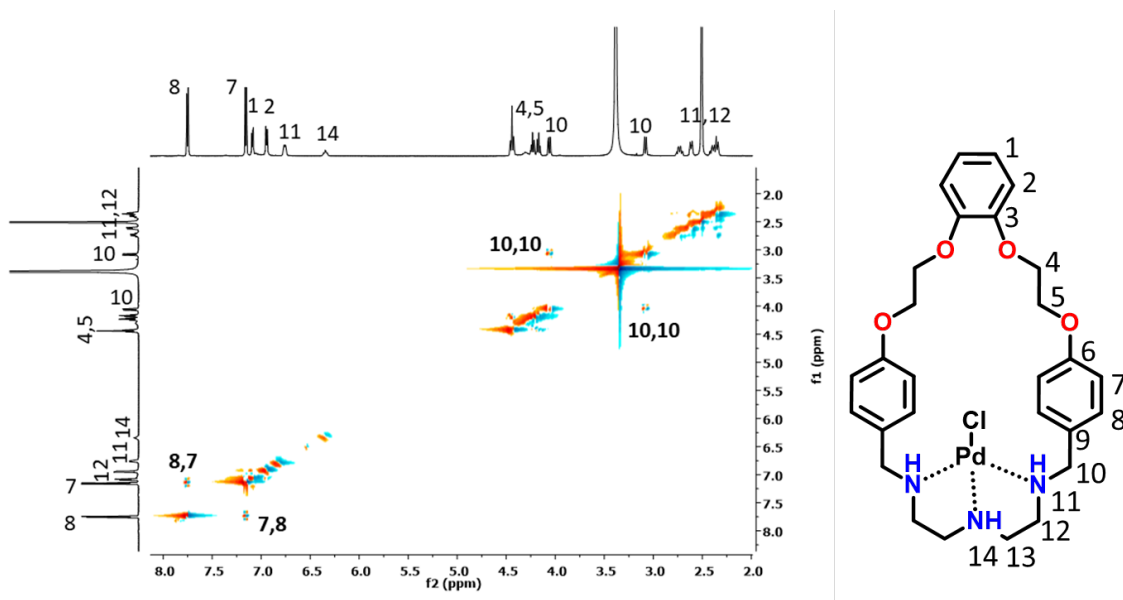

Figure 8S. 300 MHz ROESY spectrum of **CATMC-Pd** in DMSO-d<sub>6</sub>

7. Reaction mixture only with PdCl<sub>2</sub>:

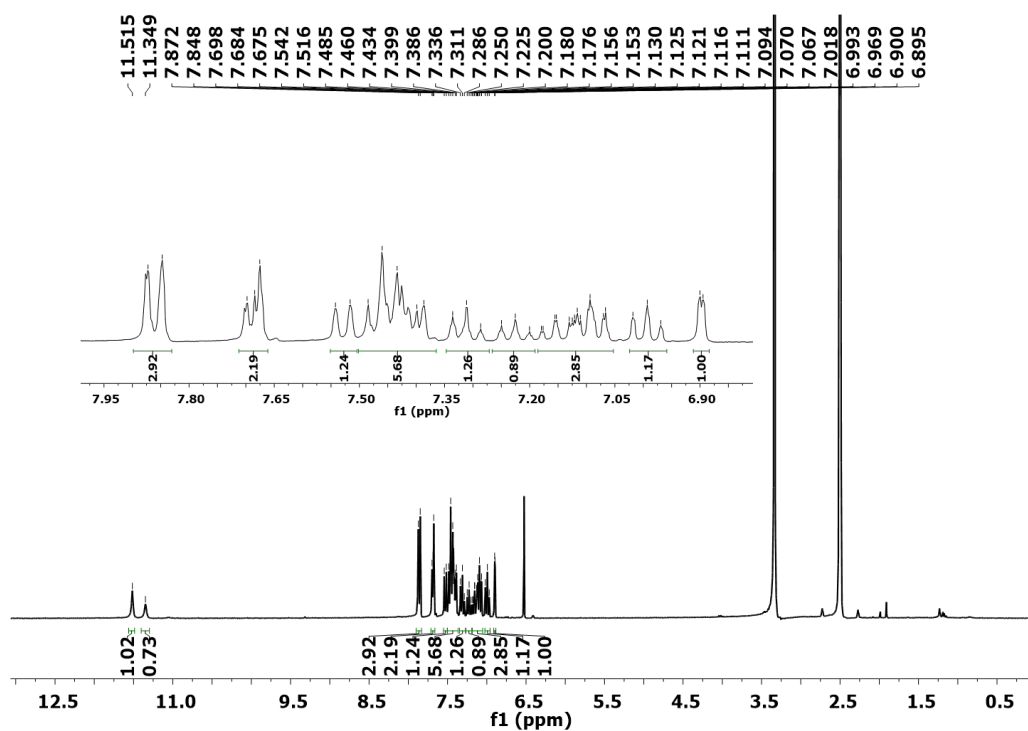

Figure 9S. 400 MHz <sup>1</sup>H-NMR spectrum of crude mixture reaction only with PdCl<sub>2</sub> in DMSO-d<sub>6</sub>

8. Reaction mixture with CATMC-Pd:

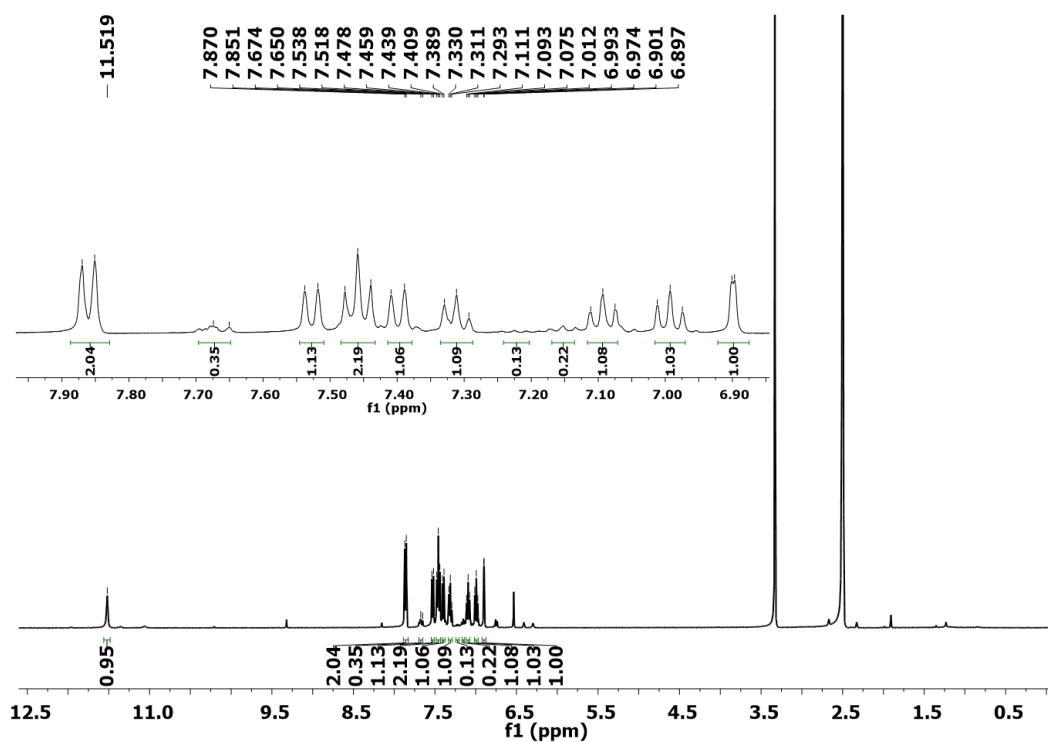

Figure 10S. 400 MHz <sup>1</sup>H-NMR spectrum of crude mixture reaction only with CATMC-Pd in DMSO-d<sub>6</sub>

9. GC-MS chromatogram:

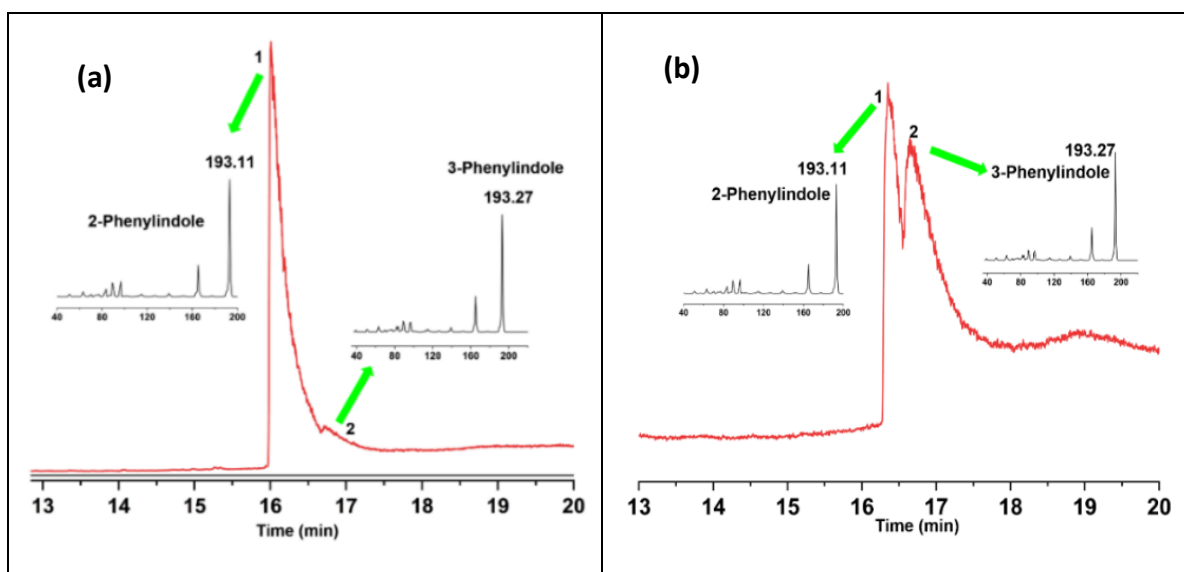

Figure 11S. GC-MS chromatogram for crude (a) with **CATMC-Pd** and (b) with  $\text{PdCl}_2$

10. The equation for calculating the selectivity for C2-phenylindole (**3a**)

|                                                                                                                                                                                |                                                                                                                                                                                                      |
|--------------------------------------------------------------------------------------------------------------------------------------------------------------------------------|------------------------------------------------------------------------------------------------------------------------------------------------------------------------------------------------------|
| $  \begin{aligned}  (\% \text{Selectivity})_{\text{PdCl}_2} &= \frac{I_{3a}}{I_{3a} + I_{4a}} \times 100 \\  &= \frac{1}{1 + 0.89} \times 100 \\  &= 52.91\%  \end{aligned}  $ | $  \begin{aligned}  (\% \text{Selectivity})_{\text{CATMC-Pd}} &= \frac{I_{3a}}{I_{3a} + I_{4a}} \times 100 \\  &\approx \frac{1}{1 + (\text{trace amount})} \times 100 \\  &> 90\%  \end{aligned}  $ |
|--------------------------------------------------------------------------------------------------------------------------------------------------------------------------------|------------------------------------------------------------------------------------------------------------------------------------------------------------------------------------------------------|

Where  $I_{3a}$  and  $I_{4a}$  are the peak intensities corresponding products **3a** and **4a** respectively as determined from the crude  $^1\text{H-NMR}$  (Figure 9S-10S, ESI).



## 11. Leaching test:

### a. Characterization of CATMC-Pd bound with 4-Methylpyridine

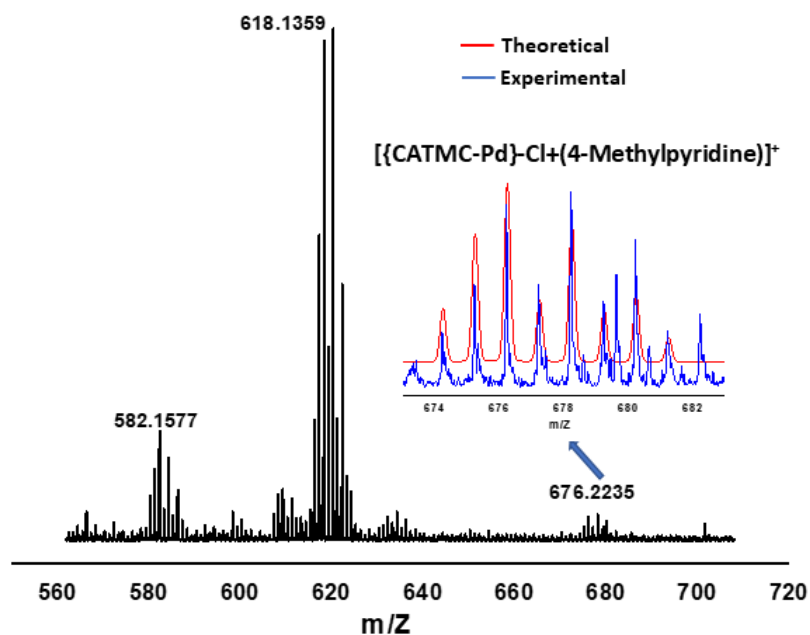

Figure 12S. HRMS data of  $[\{\text{CATMC-Pd}\}\text{-Cl}+(4\text{-Methylpyridine})]^+$

### b. ICP-MS data

| SampleID      | Analyte    | Mean       |
|---------------|------------|------------|
| Calib Blank 1 |            |            |
|               | Pd 340.458 |            |
| 0.1           |            |            |
|               | Pd 340.458 | [0.1] mg/L |
| 0.5           |            |            |
|               | Pd 340.458 | [0.5] mg/L |
| 1             |            |            |
|               | Pd 340.458 | [1] mg/L   |
| rev-Pd        |            |            |
|               | Pd 340.458 | 18.95 mg/L |

## 12. Table 1S: Comparative table of direct C2-arylation with previous reported catalysts vs. our catalyst

| Ref. | Reactions | Catalyst (mol %)               | Additives | Temp (°C).          | Time | Solvent | Yields (%) |
|------|-----------|--------------------------------|-----------|---------------------|------|---------|------------|
| S16  |           | $\text{Na}_2\text{PdCl}_4$ (5) | KOAc      | 100<br>(High temp.) | 4h   | DCE     | 85         |

|                 |                                                                                   |                                       |                                 |                    |     |                       |    |
|-----------------|-----------------------------------------------------------------------------------|---------------------------------------|---------------------------------|--------------------|-----|-----------------------|----|
| <b>S17</b>      | 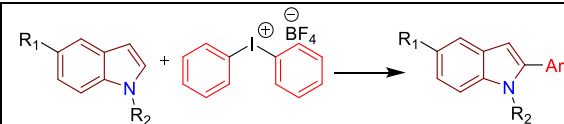 | Pd@MOF (1)                            | —                               | 80                 | 5h  | GVL                   | 80 |
| <b>S18</b>      |  | Pd/C (10)                             | —                               | 70                 | 4h  | PC/H <sub>2</sub> O   | 93 |
| <b>S19</b>      |  | Pd-NPs (10)                           | AgTFA (Stoichiometric additive) | 50                 | 5h  | MeOH/H <sub>2</sub> O | 82 |
| <b>Our Work</b> |  | CATMC-Pd (5) (lower catalyst loading) | — (additive free)               | 50 (ambient temp.) | 12h | H <sub>2</sub> O      | 93 |

#### IV. References:

- S1. S. Santra, S. Mukherjee, S. Bej, S. Saha and P. Ghosh, *Dalton Transactions*, 2015, **44**, 15198-15211.
- S2. Y.-S. Yang, S. Lee, S. H. Son, H.-S. Yoo, Y. H. Jang, J.-W. Shin, H.-J. Won, J. Sim and N.-J. Kim, *Org. Chem. Front.*, 2022, **9**, 5906-5911.
- S3. M. S. Lokolkar, P. A. Mane, S. Dey and B. M. Bhanage, *Eur. J. Org. Chem.*, 2022, **2022**, e202101505.
- S4. H. Long, K. Xu, S. Chen, J. Lin, D. Wu, B. Wu, X. Tian and L. Ackermann, *Org. Lett.*, 2019, **21**, 3053-3056.
- S5. I. Banerjee, K. C. Ghosh and S. Sinha, *J. Chem. Sci.*, 2019, **131**, 71.
- S6. G.-p. Lu and C. Cai, *Synlett*, 2012, **23**, 2992-2996.
- S7. V. Arun, M. Pilania and D. Kumar, *Chem. Asian J.*, 2016, **11**, 3345-3349.
- S8. X.Yu, E.-J. Park, T. P. Kondratyuk, J. M. Pezzuto and D. Sun, *Org. Biomol. Chem.*, 2012, **10**, 8835-8847.
- S9. G. Arora, S. Sharma and S. Joshi, *Asian J. Chem.*, 2017, **29**, 1651-1654.
- S10. C. A. D. Caiuby, M. P. de Jesus and A. C. B. Burtoloso, *J. Org. Chem.*, 2020, **85**, 7433-7445.
- S11. F. Campana, B. M. Massaccesi, S. Santoro, O. Piermatti and L. Vaccaro, *ACS Sustain. Chem. Eng.*, 2020, **8**, 16441-16450.
- S12. W.-M. Dai, D.-S. Guo and L.-P. Sun, *Tetrahedron Lett.*, 2001, **42**, 5275-5278.

- S13. J. He, X. Zhang, Q. He, H. Guo and R. Fan, *Chem. Commun.*, 2021, **57**, 5442-5445.
- S14. C. Liu, L. Ding, G. Guo, W. Liu and F.-L. Yang, *Org. Biomol. Chem.*, 2016, **14**, 2824-2827.
- S15. S. Yu, L. Qi, K. Hu, J. Gong, T. Cheng, Q. Wang, J. Chen and H. Wu, *J. Org. Chem.*, 2017, **82**, 3631-3638.
- S16. P. Xu and X. H. Duan, *New J. Chem.*, 2021, **45**, 19425-19431.
- S17. Anastasiou, N. Van Velthoven, E. Tomarelli, A. Lombi, D. Lanari, P. Liu, S. Bals, D. E. De Vos and L. Vaccaro, *ChemSusChem*, 2020, **13**, 2786-2791.
- S18. F. Campana, B. M. Massaccesi, S. Santoro, O. Piermatti and L. Vaccaro, *ACS Sustainable Chem. Eng.*, 2020, **8**, 16441-16450.
- S19. P. Bhattacharjee, A. Dewan, P. K. Boruah, M. R. Das and U. Bora, *Sustainable Chemistry and Pharmacy*, 2023, **33**, 101087.

13.  $^1\text{H}$  and  $^{13}\text{C}$  Spectra of Synthesized 2-arylindole derivatives:

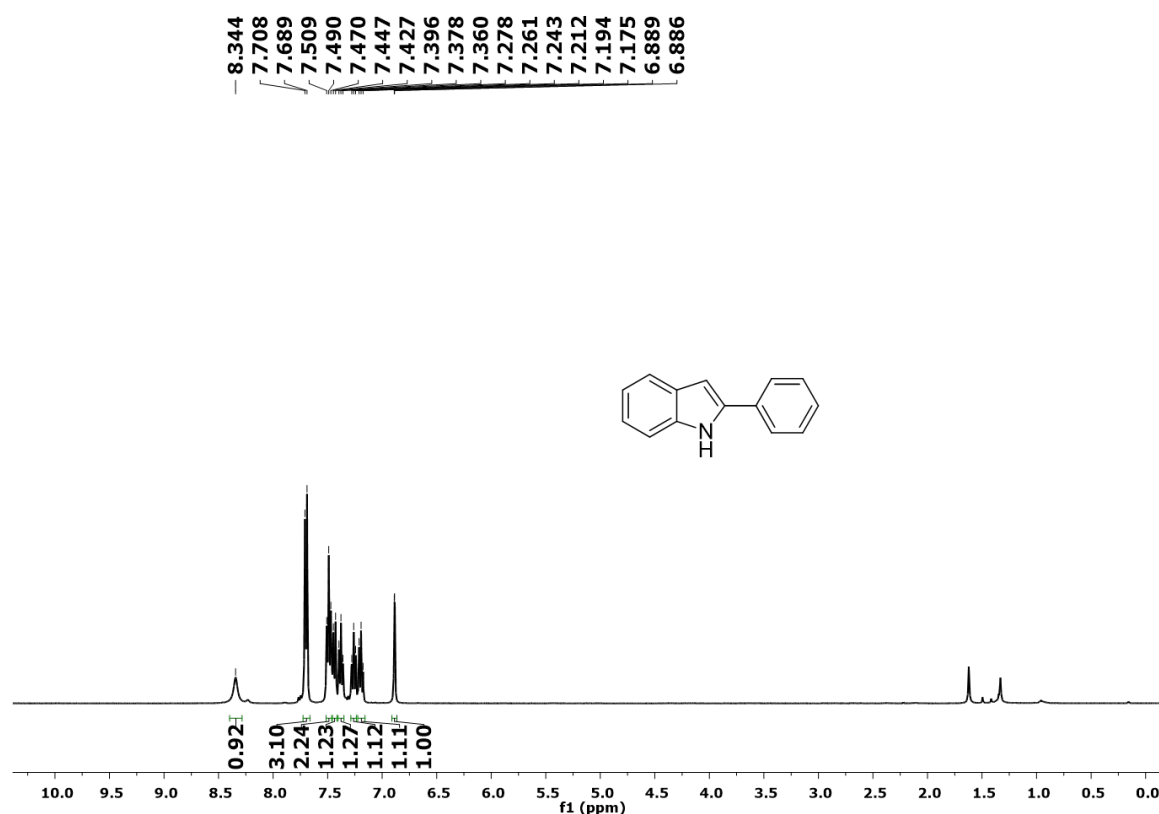

Figure 13S. 400 MHz  $^1\text{H}$ -NMR spectrum of compound **3a** in  $\text{CDCl}_3$

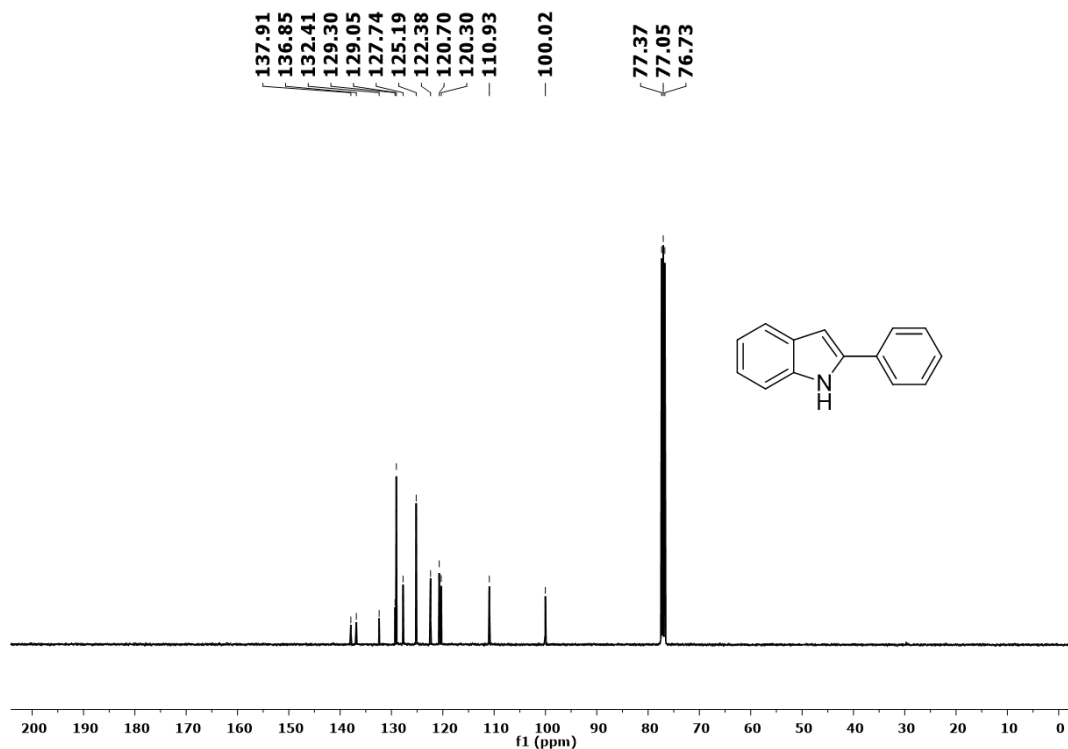

Figure 14S. 101 MHz <sup>13</sup>C-NMR spectrum of compound **3a** in CDCl<sub>3</sub>

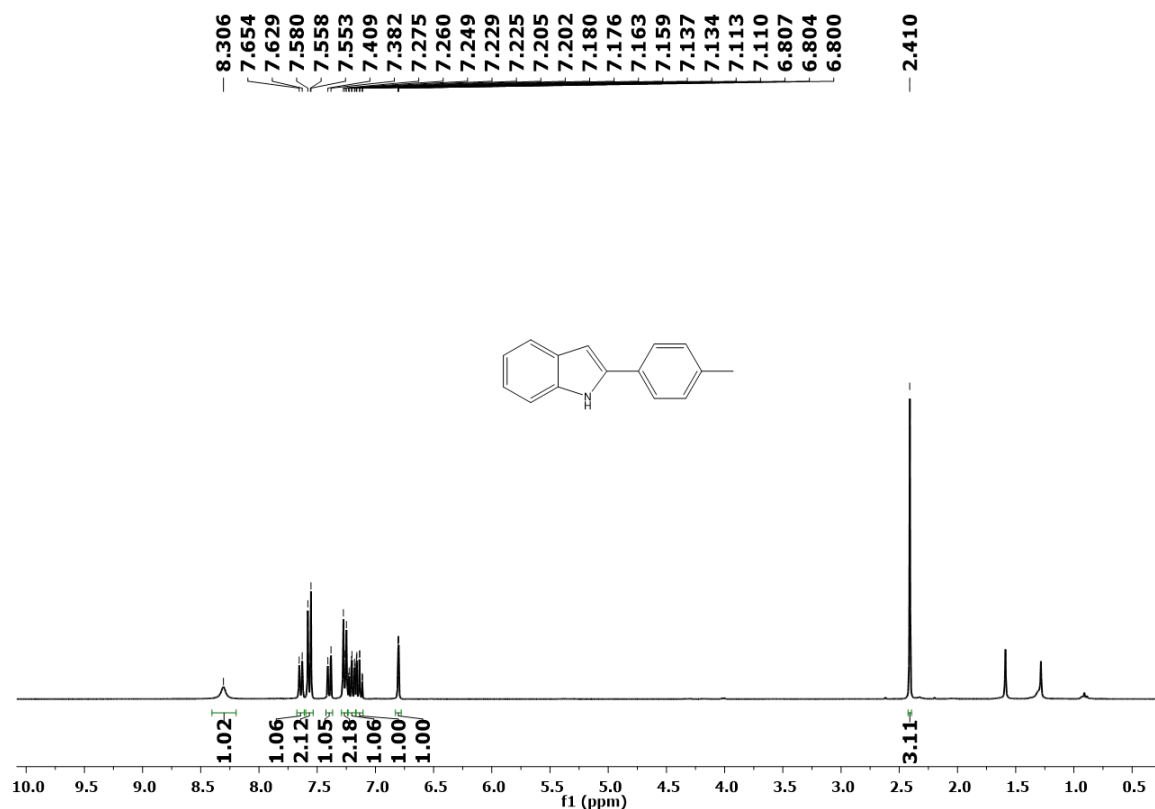

Figure 15S. 300 MHz <sup>1</sup>H-NMR spectrum of compound **3b** in CDCl<sub>3</sub>

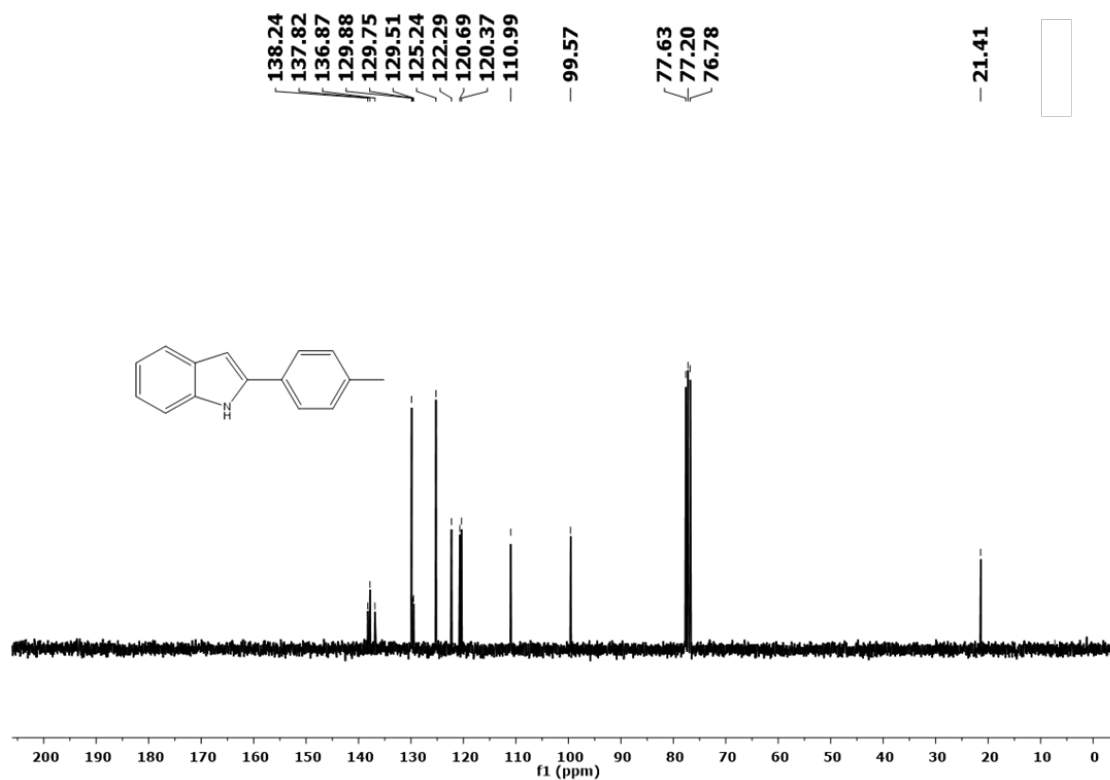

Figure 16S. 75 MHz  $^{13}\text{C-NMR}$  spectrum of compound **3b** in  $\text{CDCl}_3$

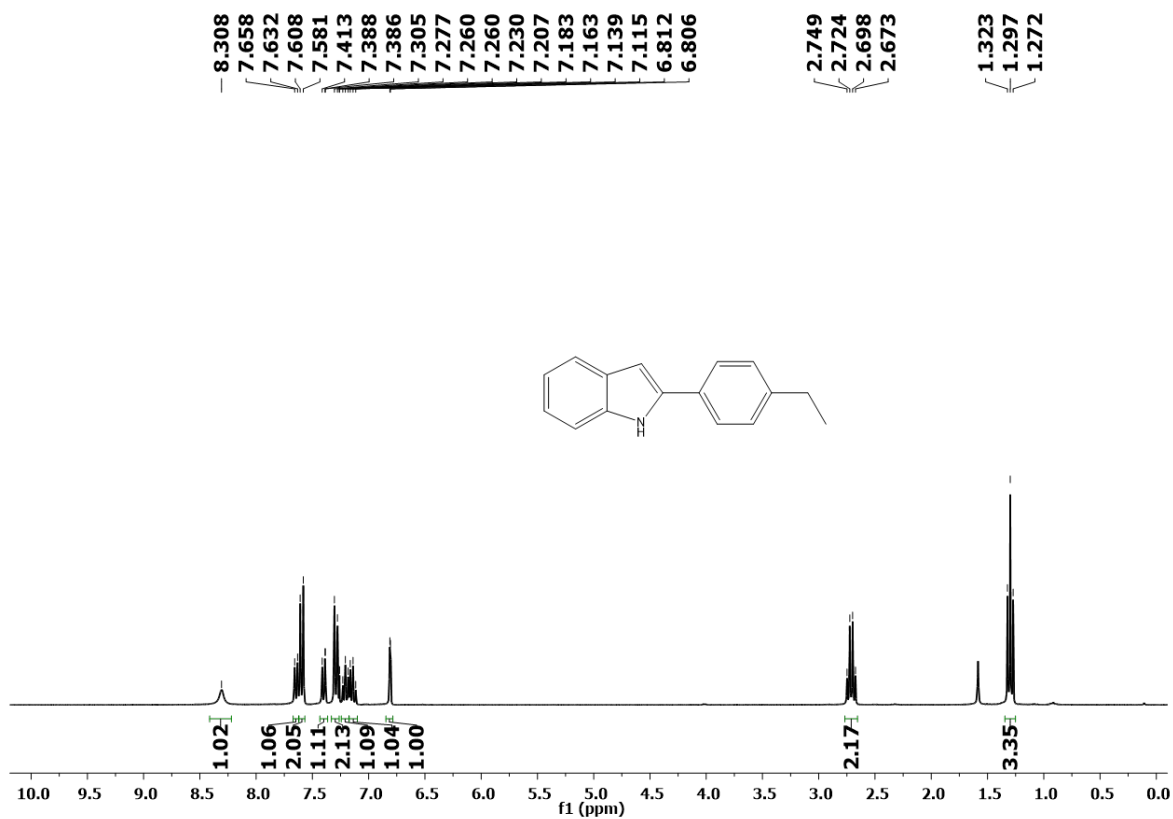

Figure 17S. 300 MHz  $^1\text{H-NMR}$  spectrum of compound **3c** in  $\text{CDCl}_3$

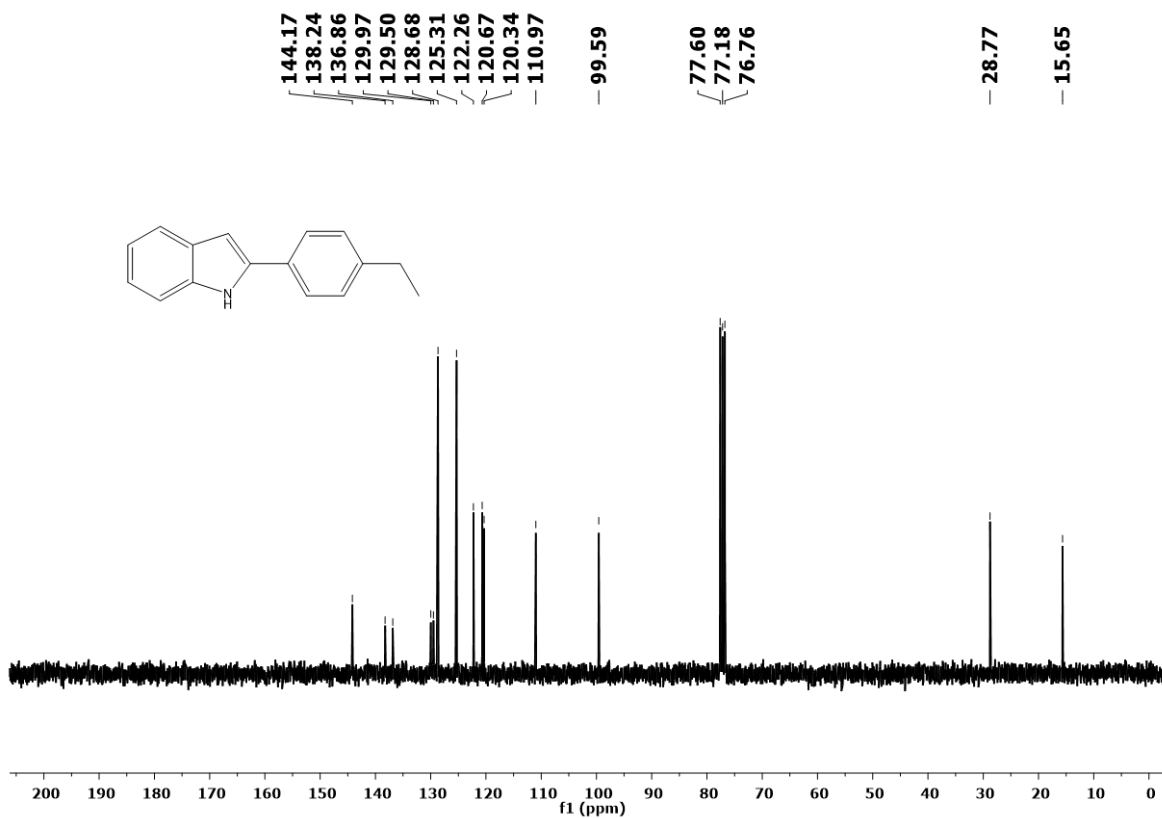

Figure 18S. 75 MHz  $^{13}\text{C}$ -NMR spectrum of compound **3c** in  $\text{CDCl}_3$

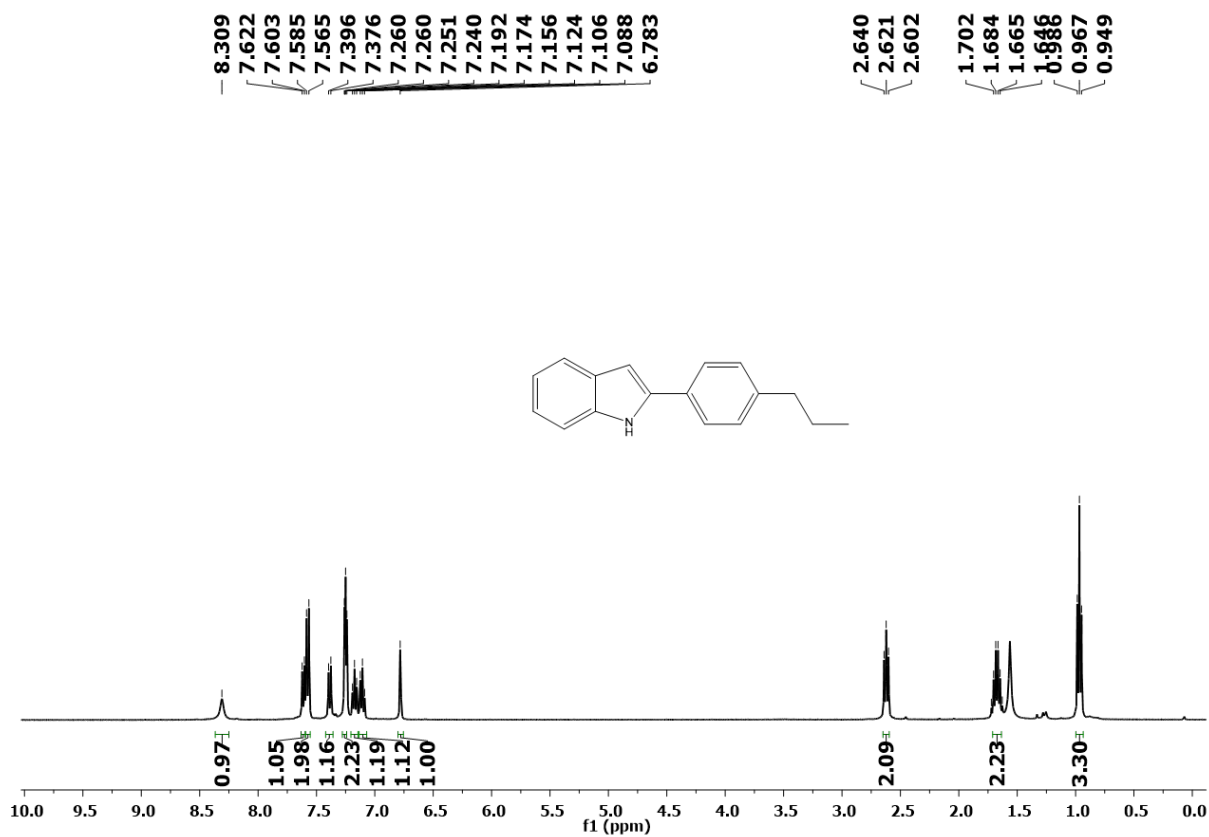

Figure 19S. 400 MHz  $^1\text{H}$ -NMR spectrum of compound **3d** in  $\text{CDCl}_3$

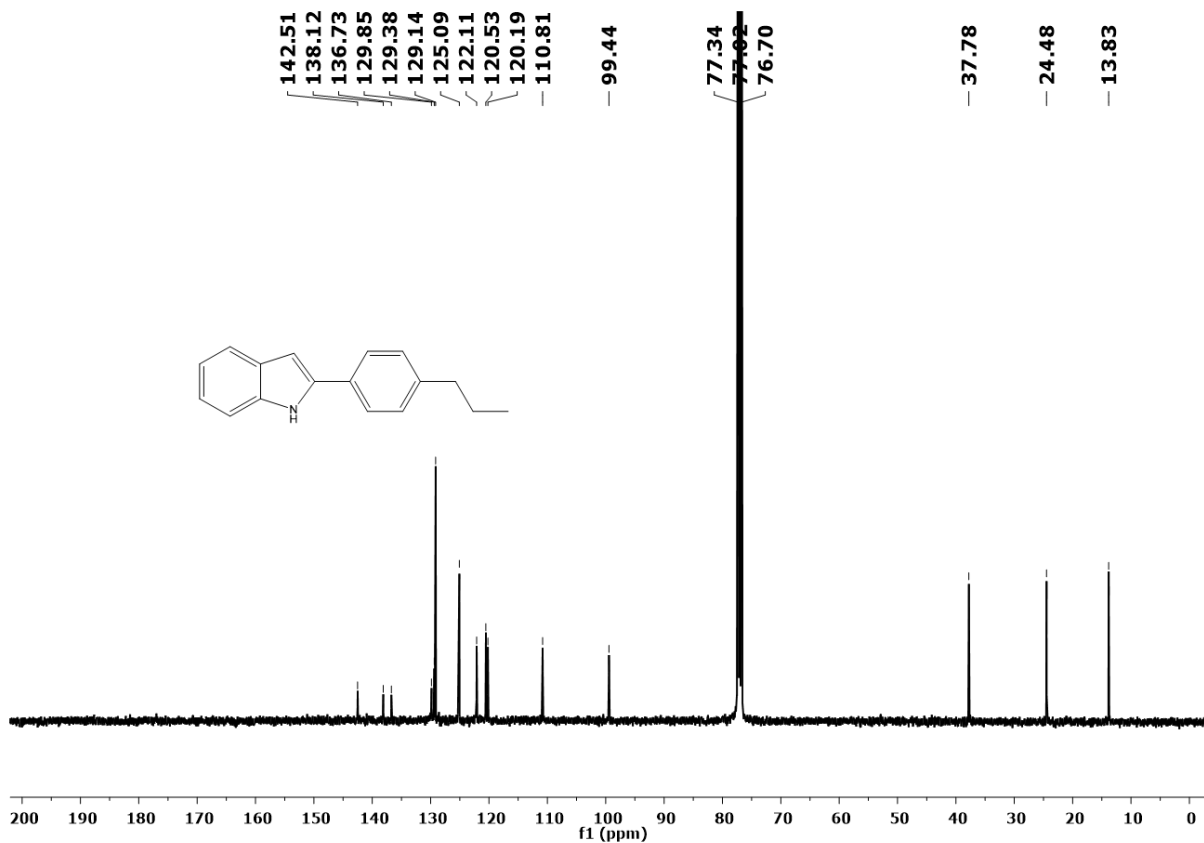

Figure 20S. 101 MHz <sup>13</sup>C-NMR spectrum of compound **3d** in CDCl<sub>3</sub>

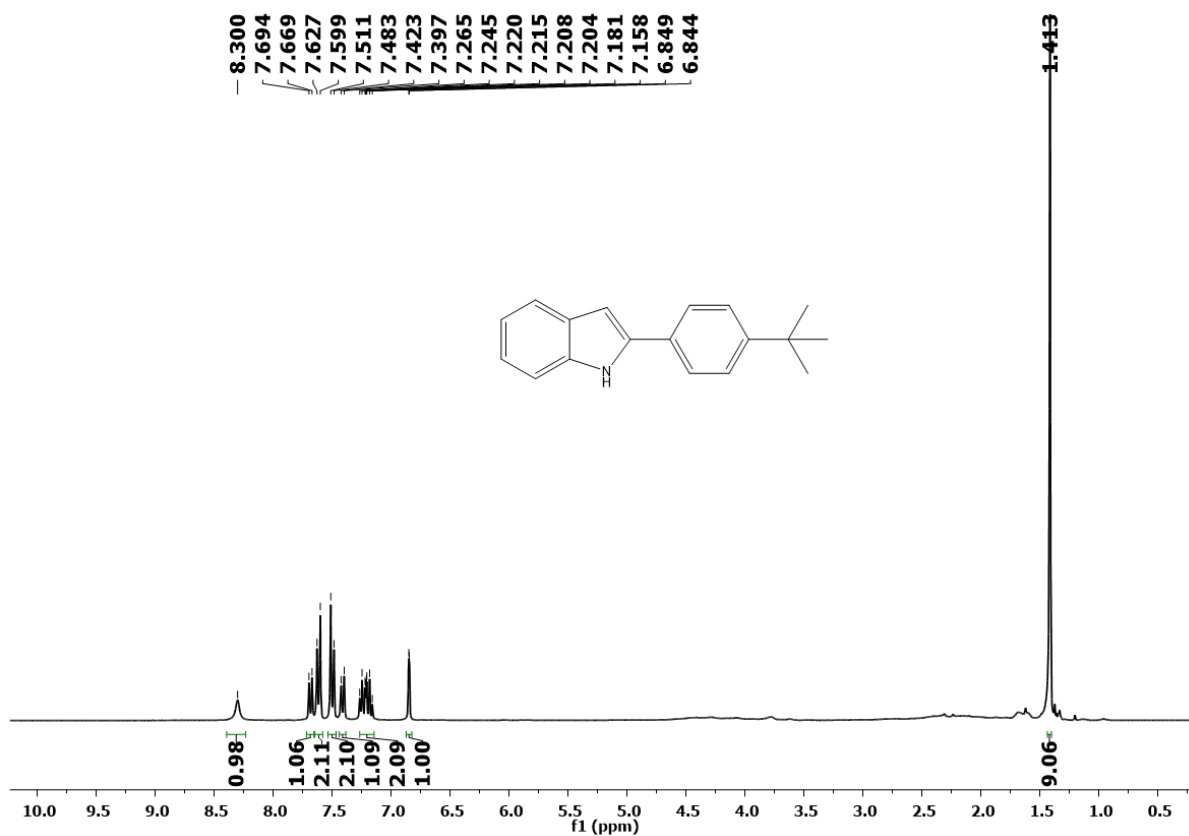

Figure 21S. 300 MHz <sup>1</sup>H-NMR spectrum of compound **3e** in CDCl<sub>3</sub>

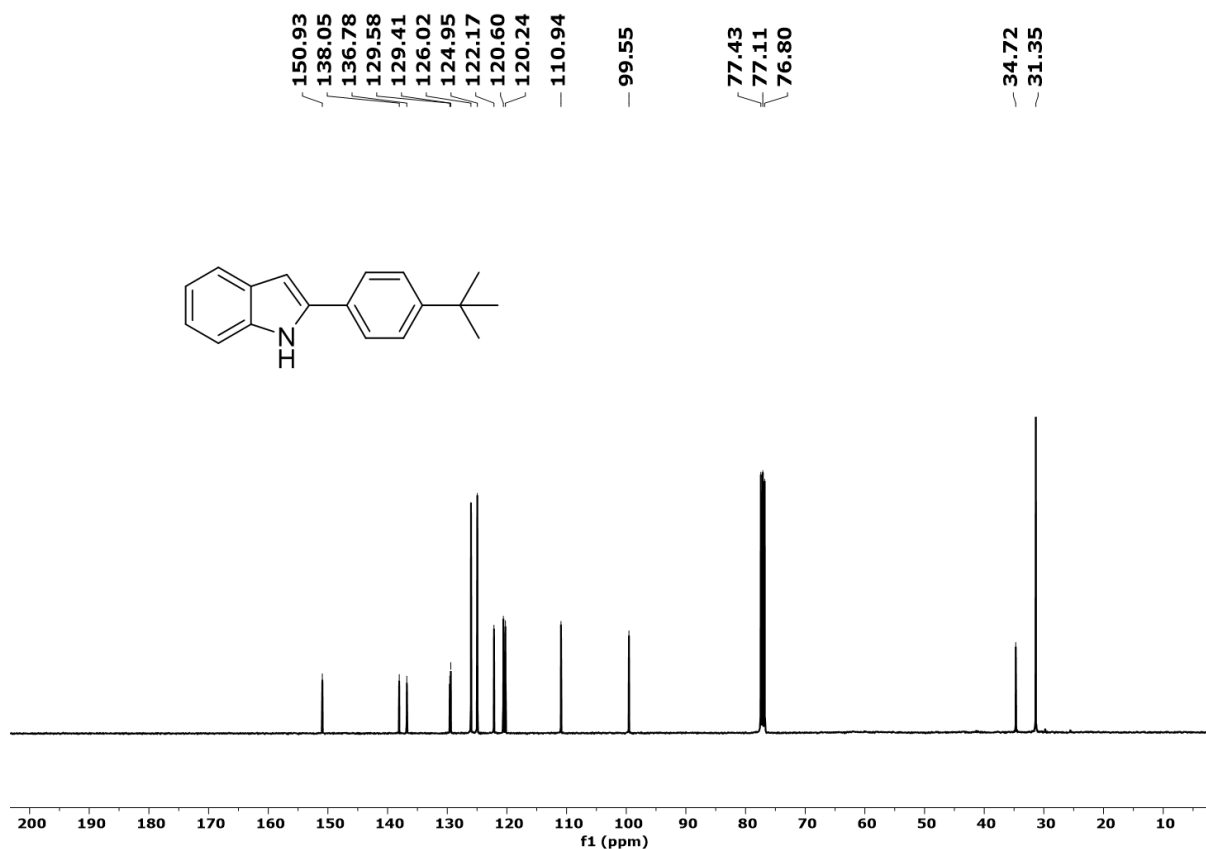

Figure 22S. 101 MHz <sup>13</sup>C-NMR spectrum of compound **3e** in CDCl<sub>3</sub>

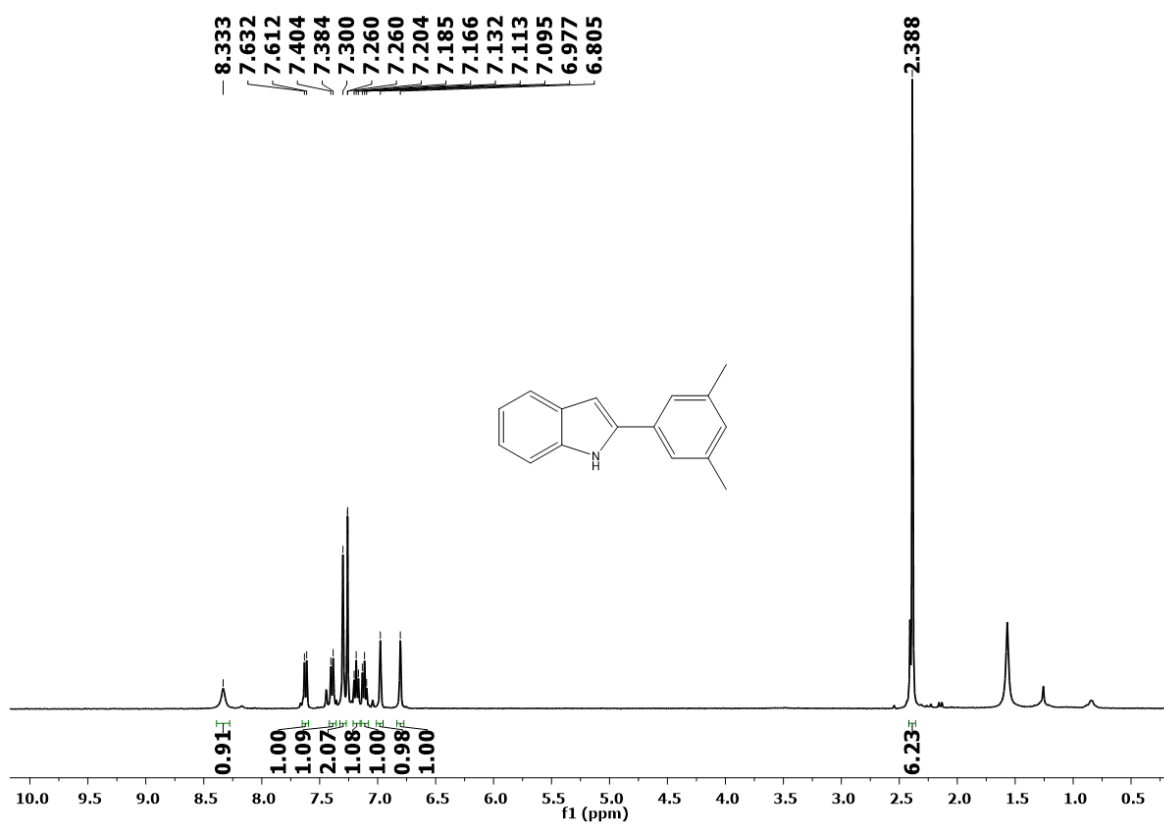

Figure 23S. 400 MHz <sup>1</sup>H-NMR spectrum of compound **3f** in CDCl<sub>3</sub>



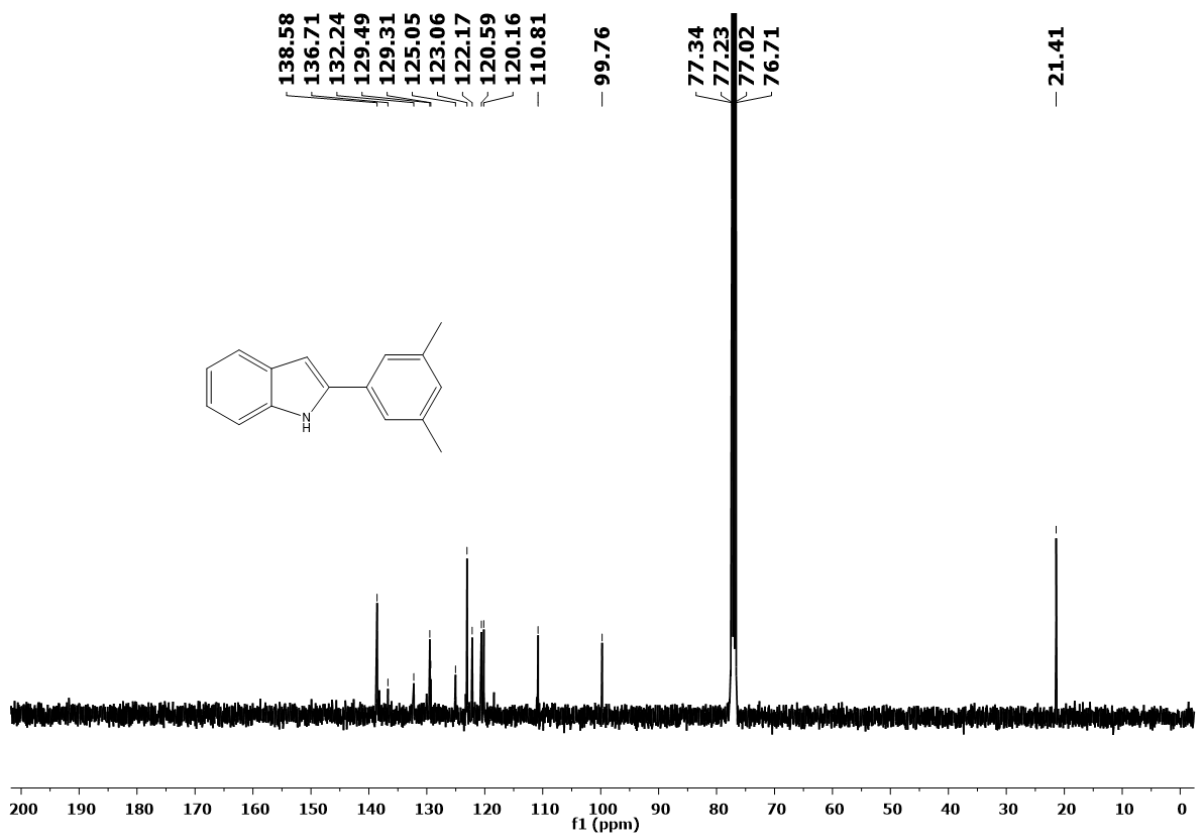

Figure 24S. 101 MHz <sup>13</sup>C-NMR spectrum of compound **3f** in CDCl<sub>3</sub>

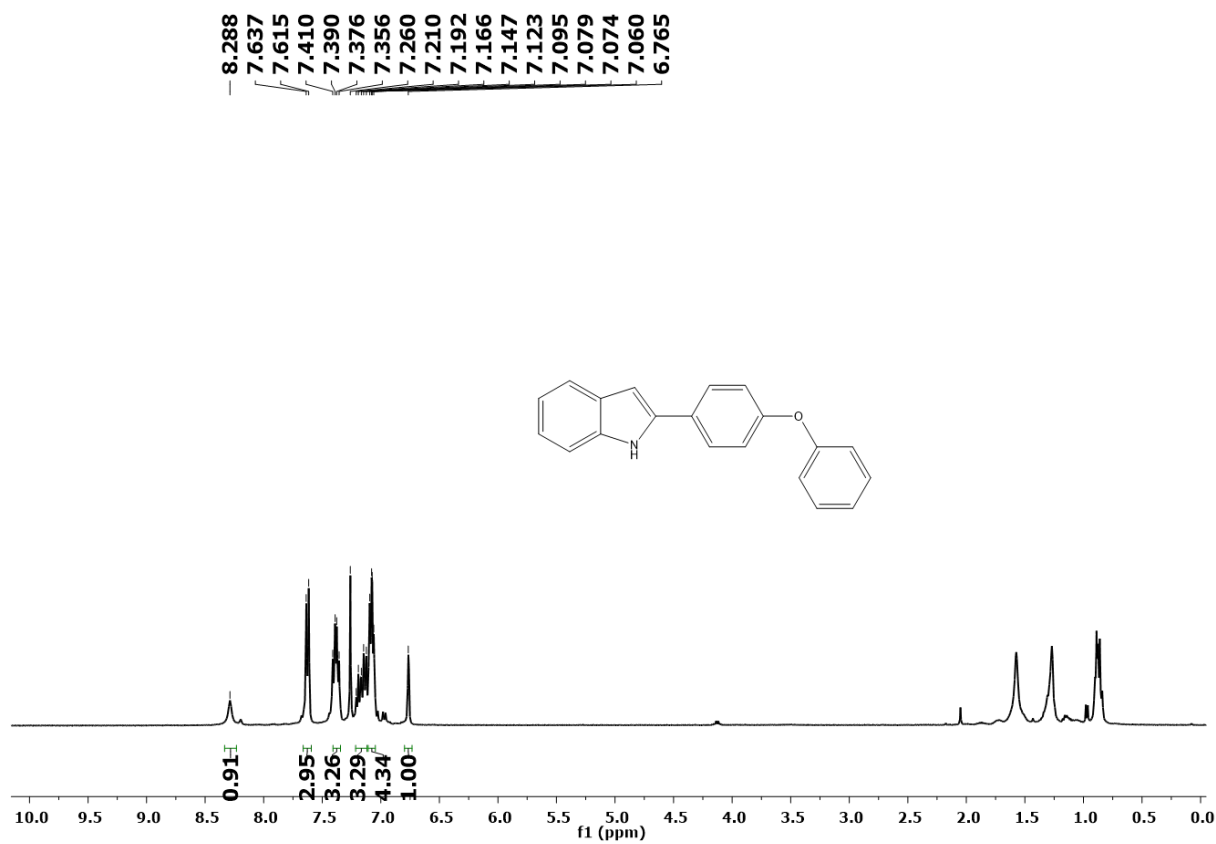

Figure 25S. 400 MHz <sup>1</sup>H-NMR spectrum of compound **3g** in CDCl<sub>3</sub>

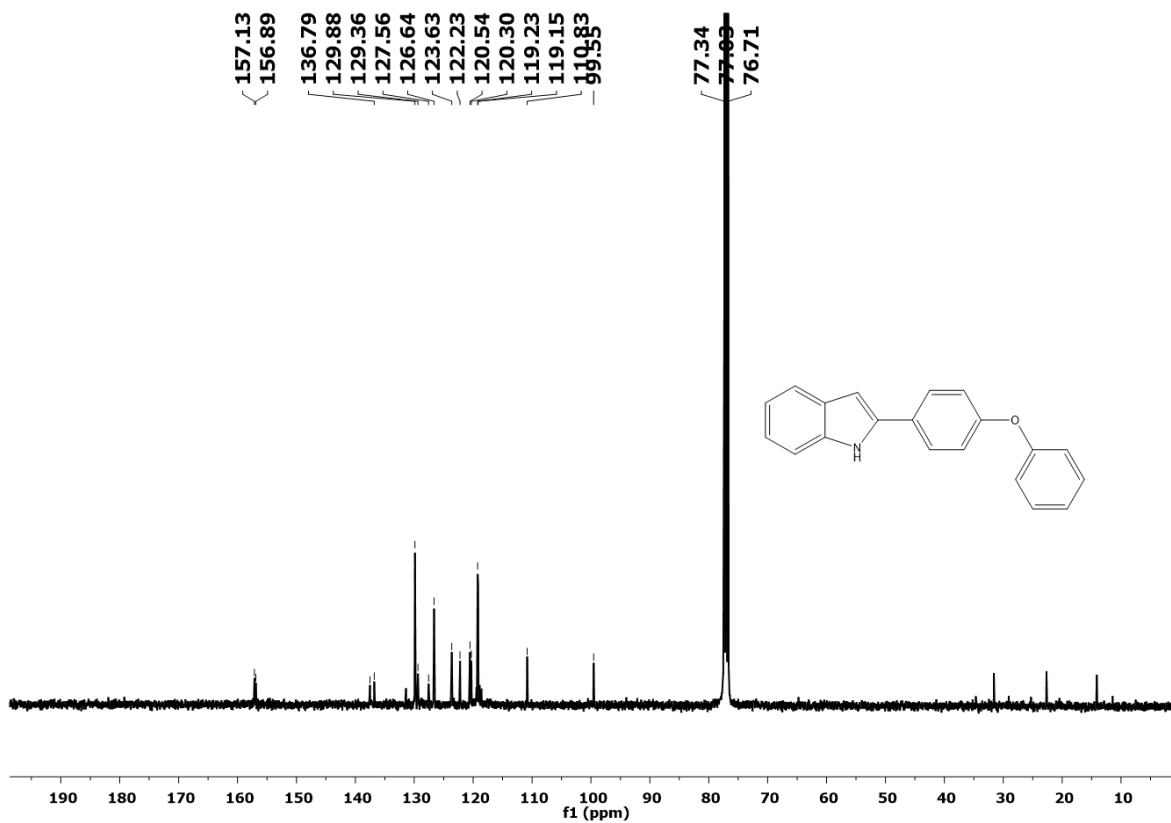

Figure 26S. 101 MHz <sup>13</sup>C-NMR spectrum of compound **3g** in CDCl<sub>3</sub>

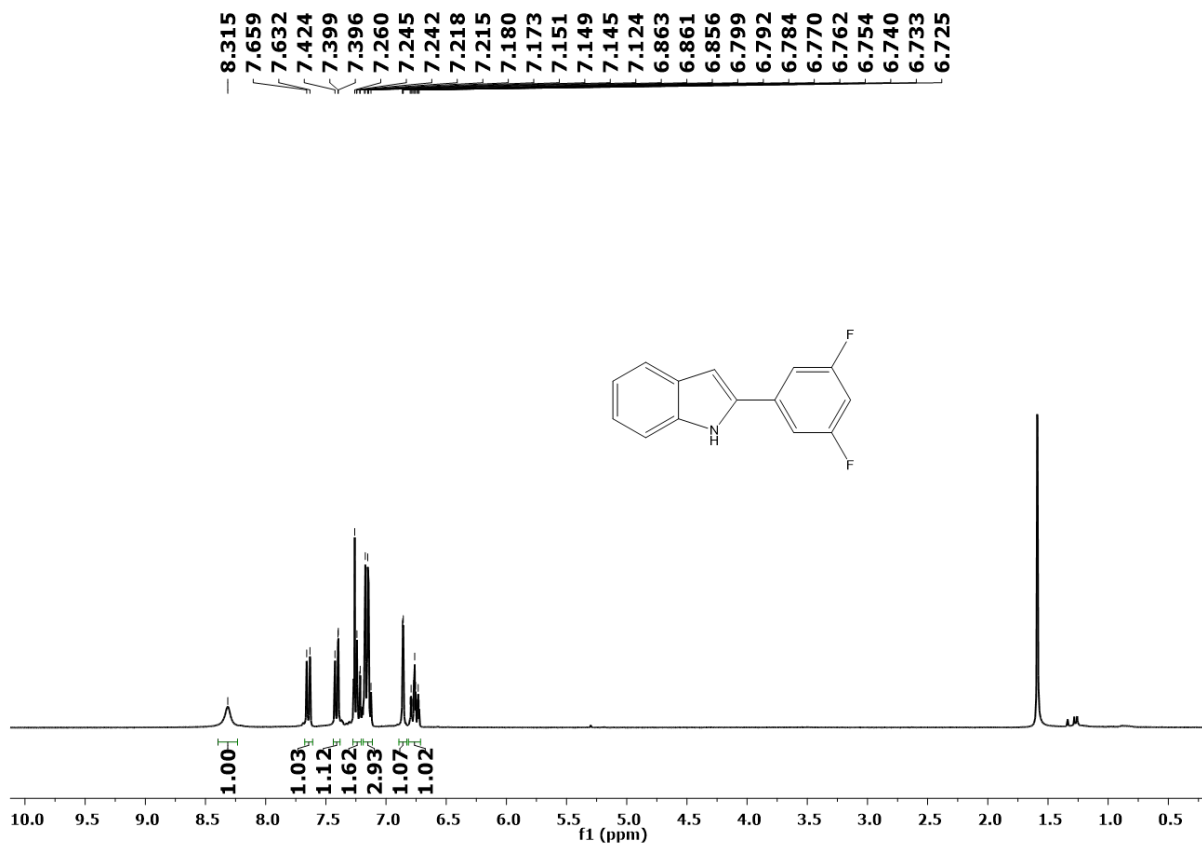

Figure 27S. 300 MHz <sup>1</sup>H-NMR spectrum of compound **3h** in CDCl<sub>3</sub>

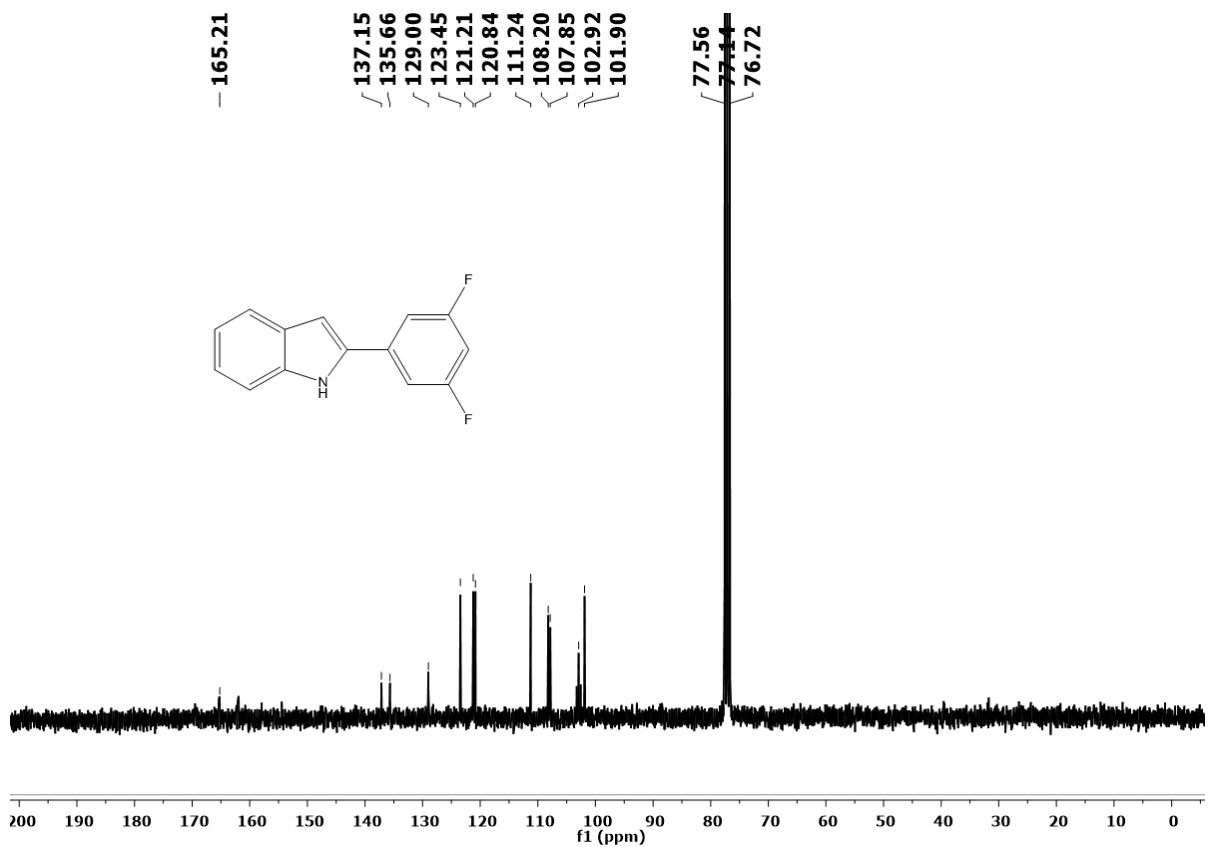

Figure 28S. 75 MHz <sup>13</sup>C-NMR spectrum of compound **3h** in CDCl<sub>3</sub>

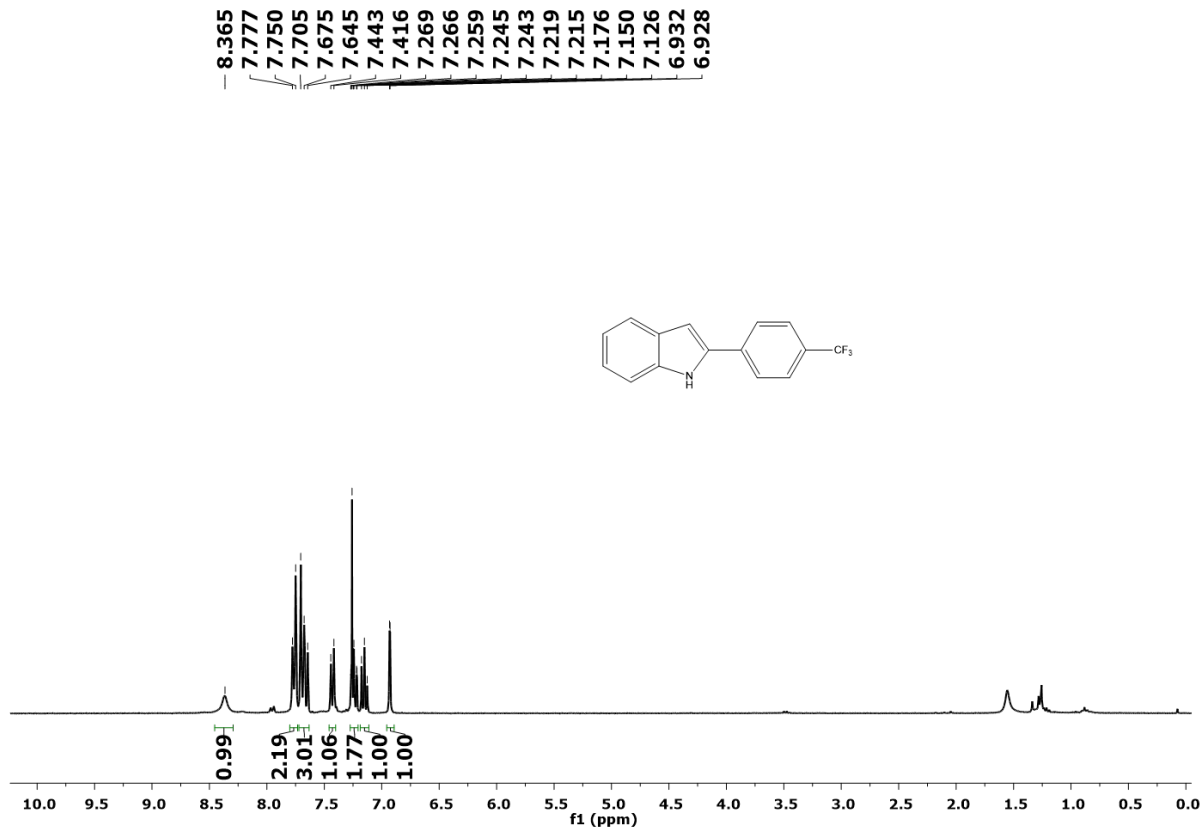

Figure 29S. 300 MHz <sup>1</sup>H-NMR spectrum of compound **3i** in CDCl<sub>3</sub>

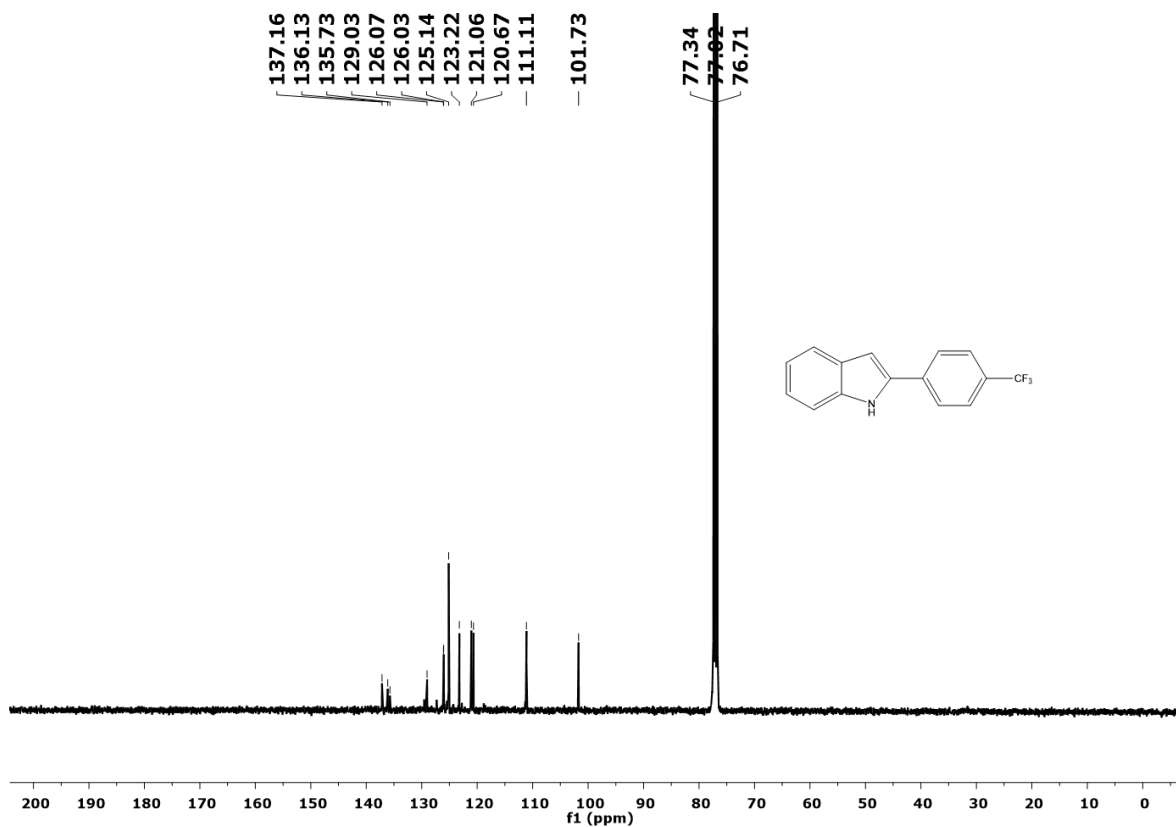

Figure 30S. 101 MHz  $^{13}\text{C-NMR}$  spectrum of compound **3i** in  $\text{CDCl}_3$

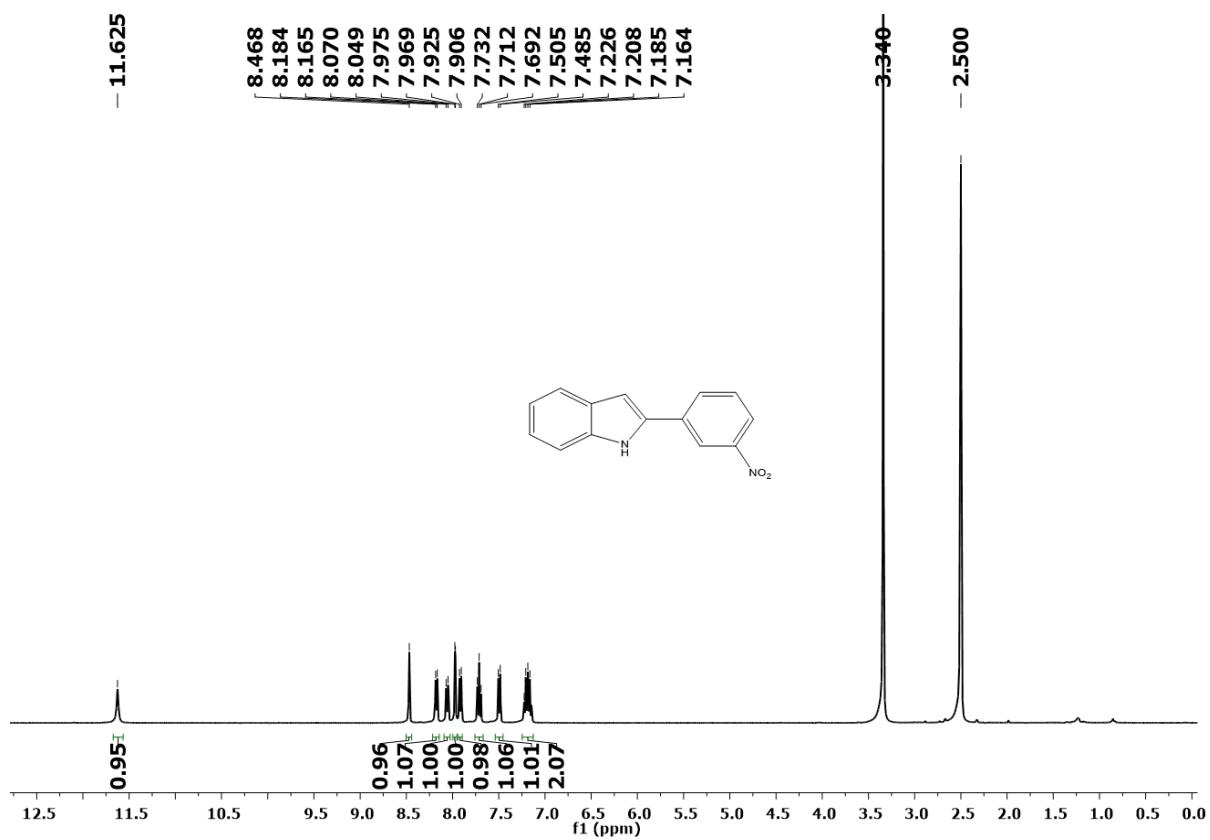

Figure 31S. 400 MHz  $^1\text{H-NMR}$  spectrum of compound **3j** in  $\text{DMSO-d}_6$

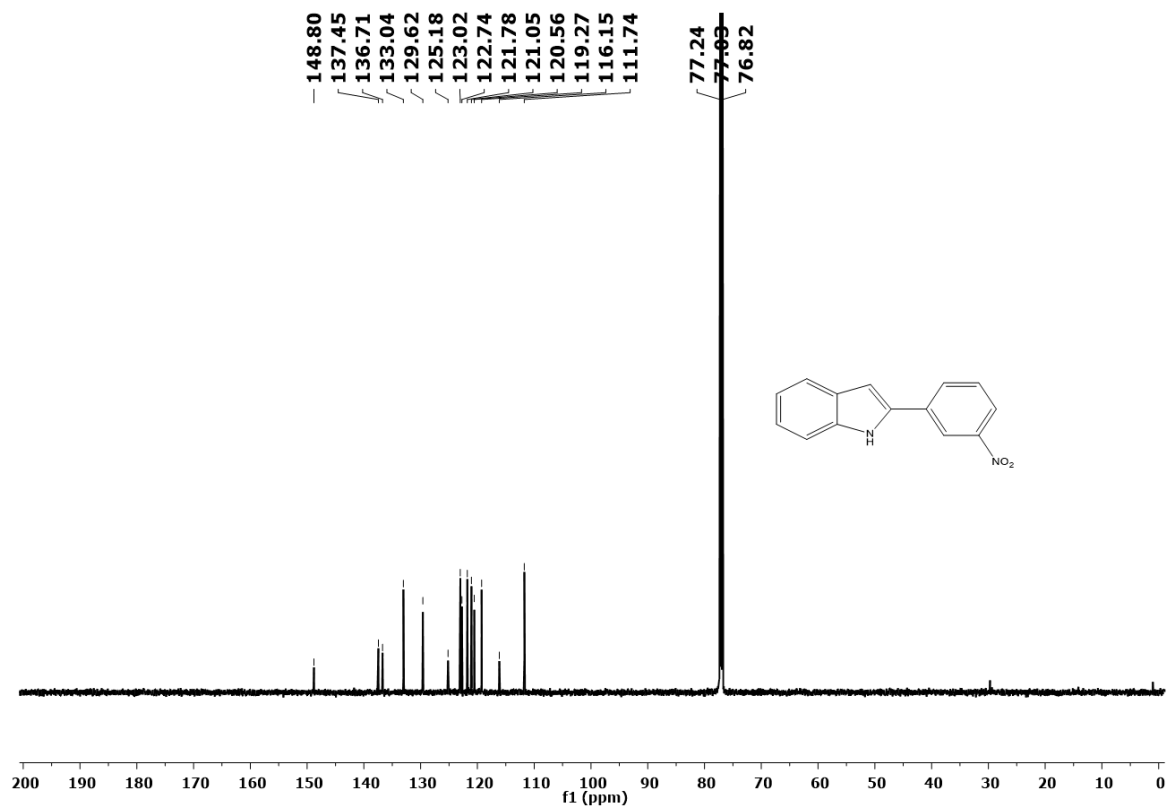

Figure 32S. 151 MHz <sup>13</sup>C-NMR spectrum of compound **3j** in CDCl<sub>3</sub>

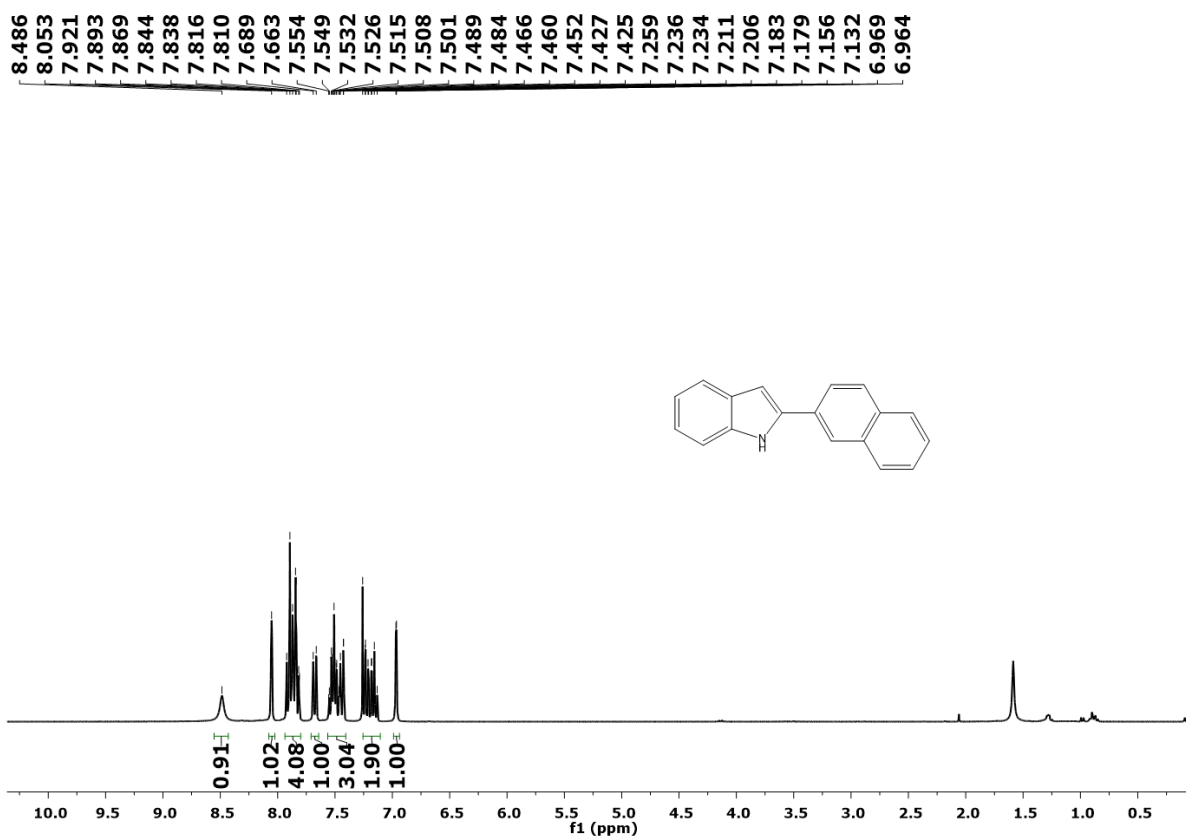

Figure 33S. 300 MHz <sup>1</sup>H-NMR spectrum of compound **3k** in CDCl<sub>3</sub>

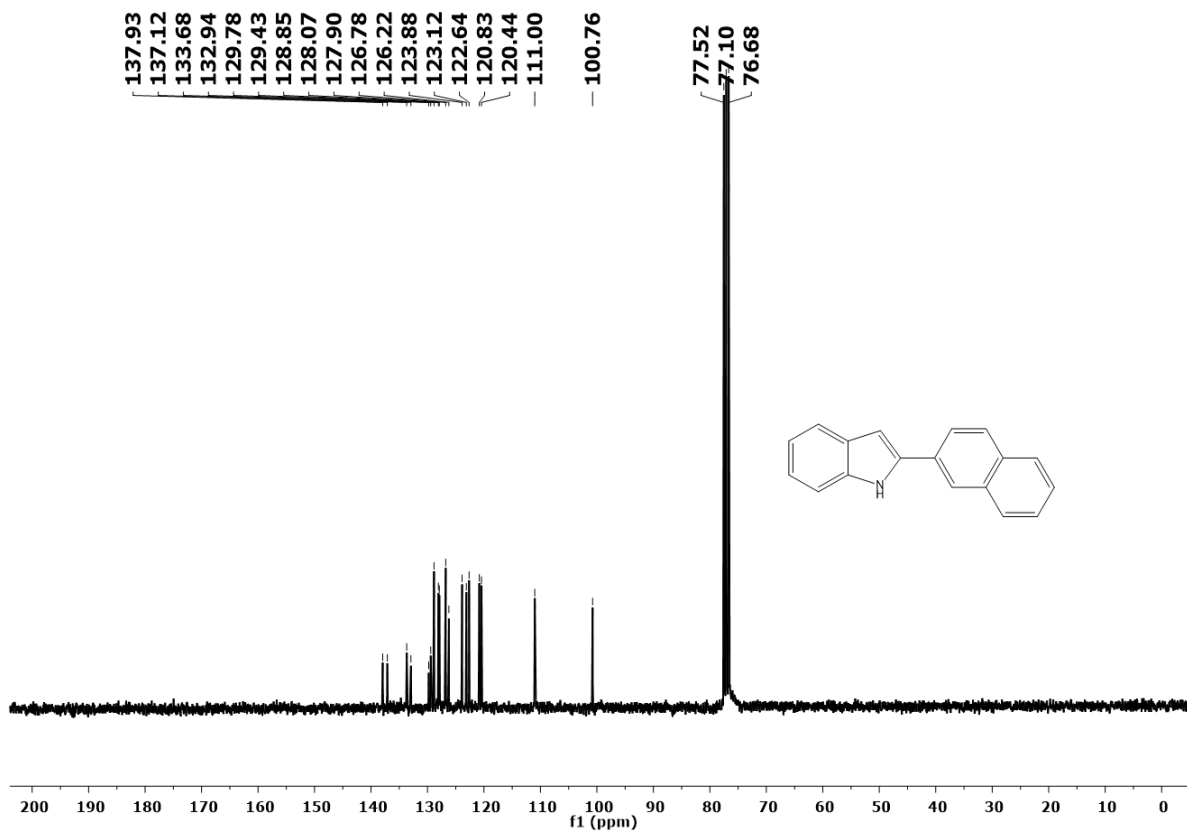

Figure 34S. 75 MHz  $^{13}\text{C-NMR}$  spectrum of compound **3k** in  $\text{CDCl}_3$

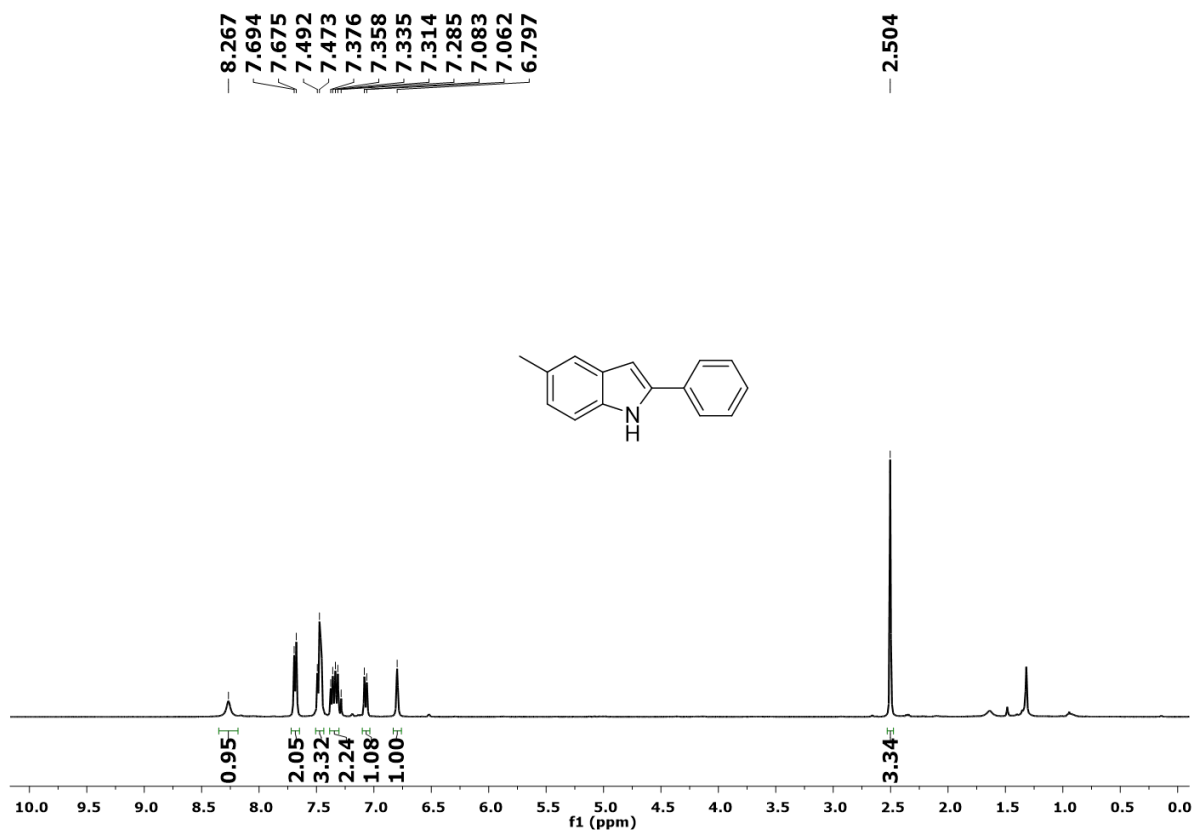

Figure 35S. 400 MHz  $^1\text{H-NMR}$  spectrum of compound **3l** in  $\text{CDCl}_3$

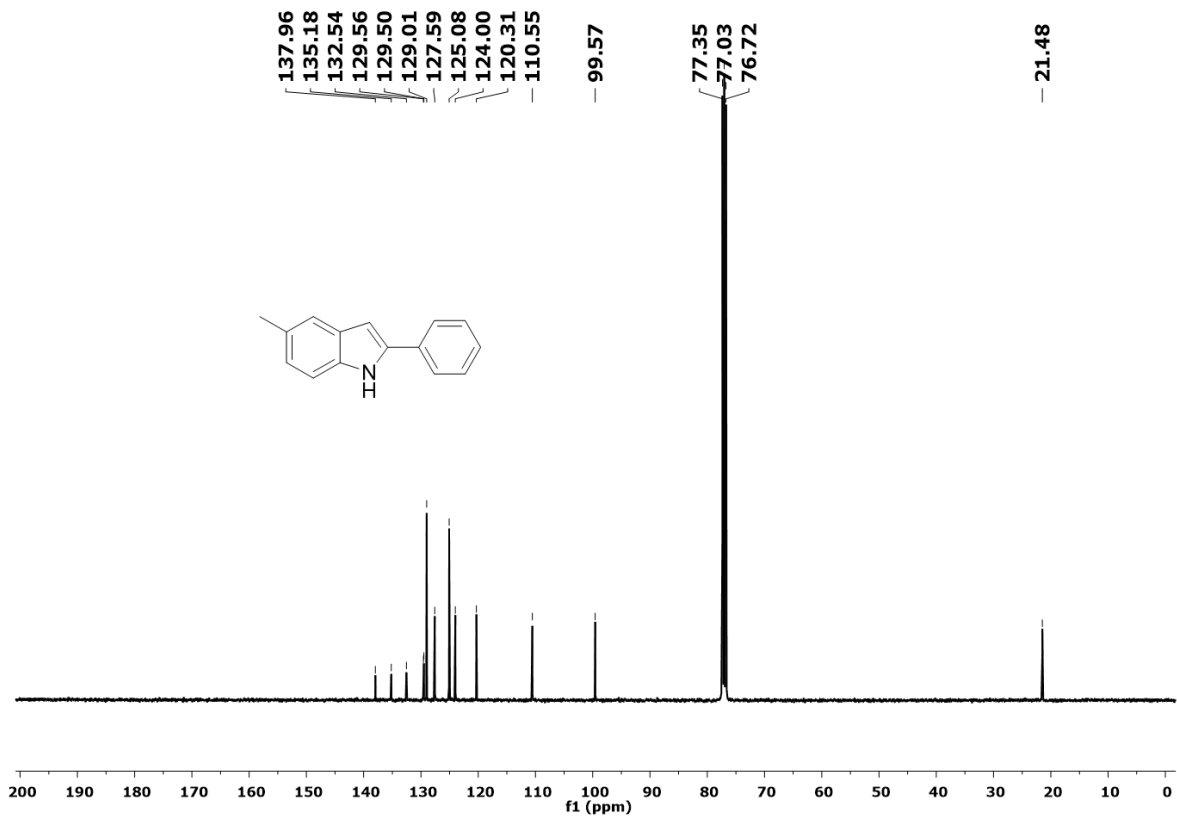

Figure 36S. 101 MHz <sup>13</sup>C-NMR spectrum of compound **3l** in CDCl<sub>3</sub>

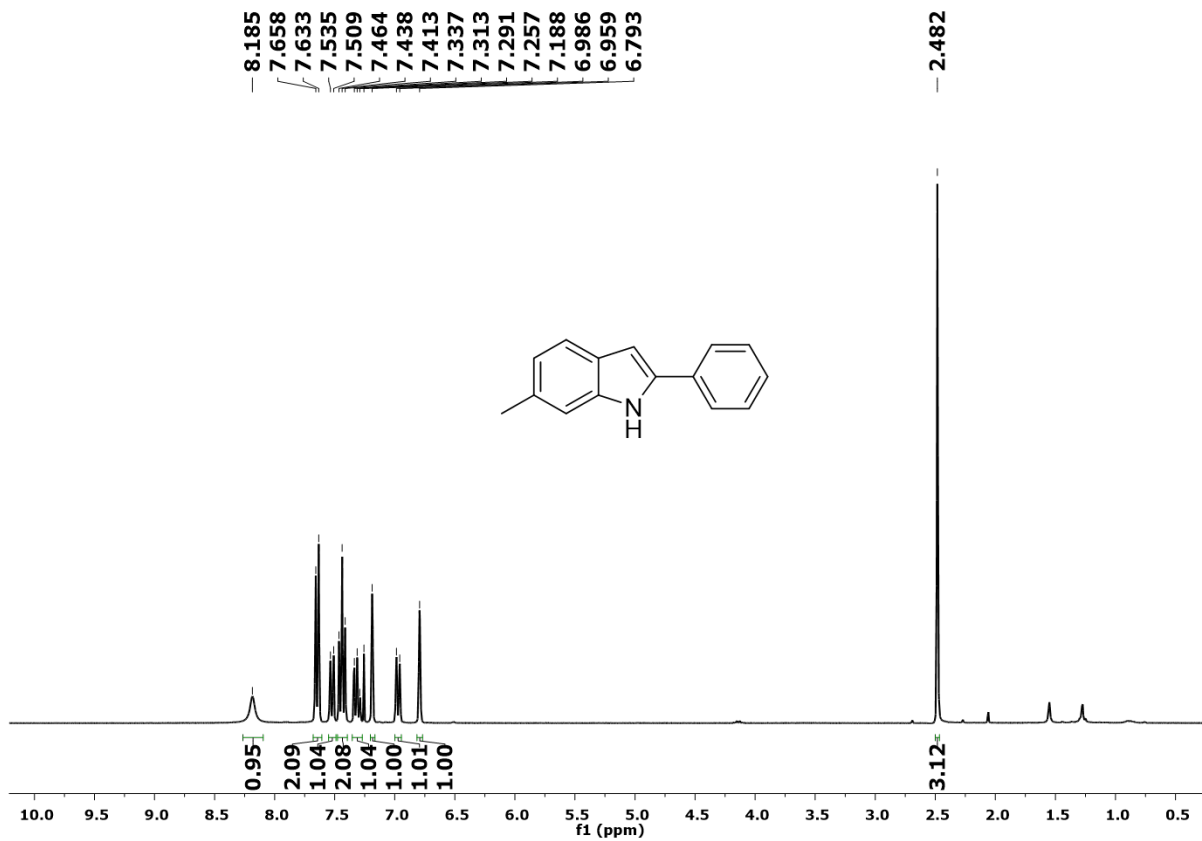

Figure 37S. 300 MHz <sup>1</sup>H-NMR spectrum of compound **3m** in CDCl<sub>3</sub>

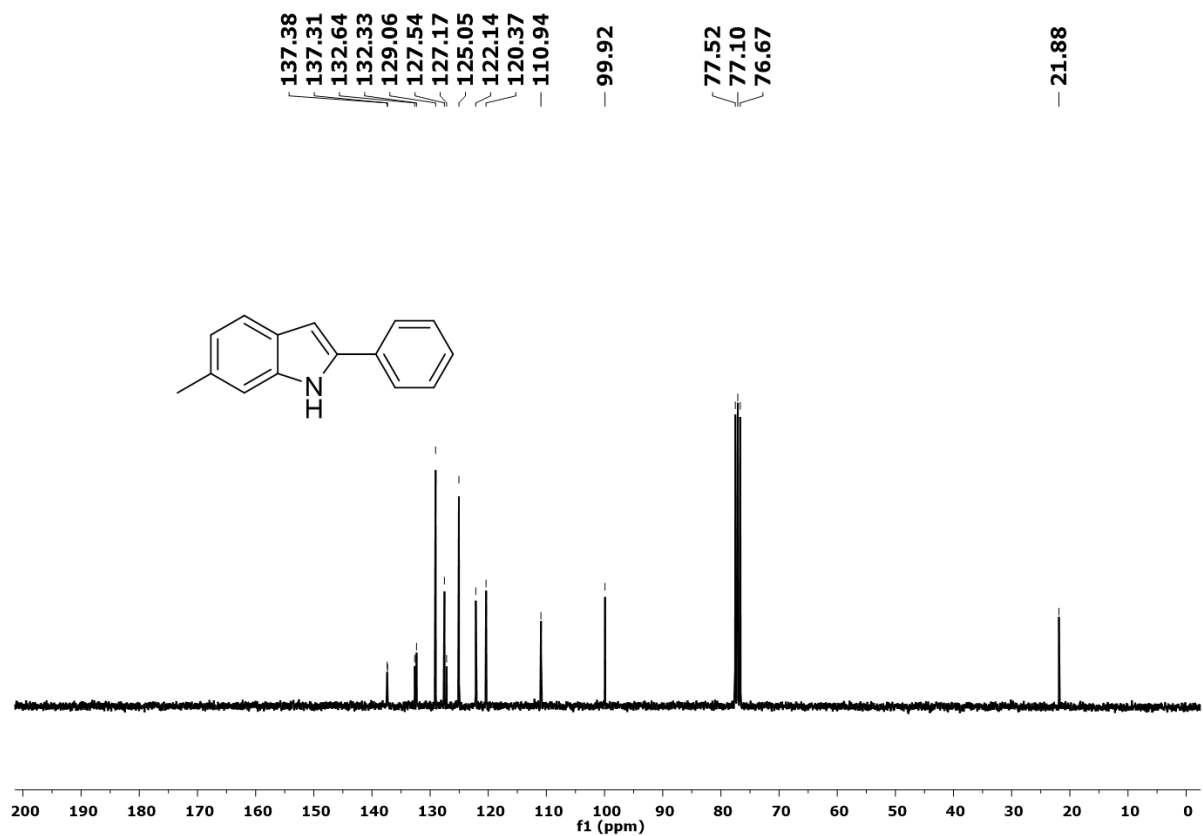

Figure 38S. 75 MHz <sup>13</sup>C-NMR spectrum of compound **3m** in CDCl<sub>3</sub>

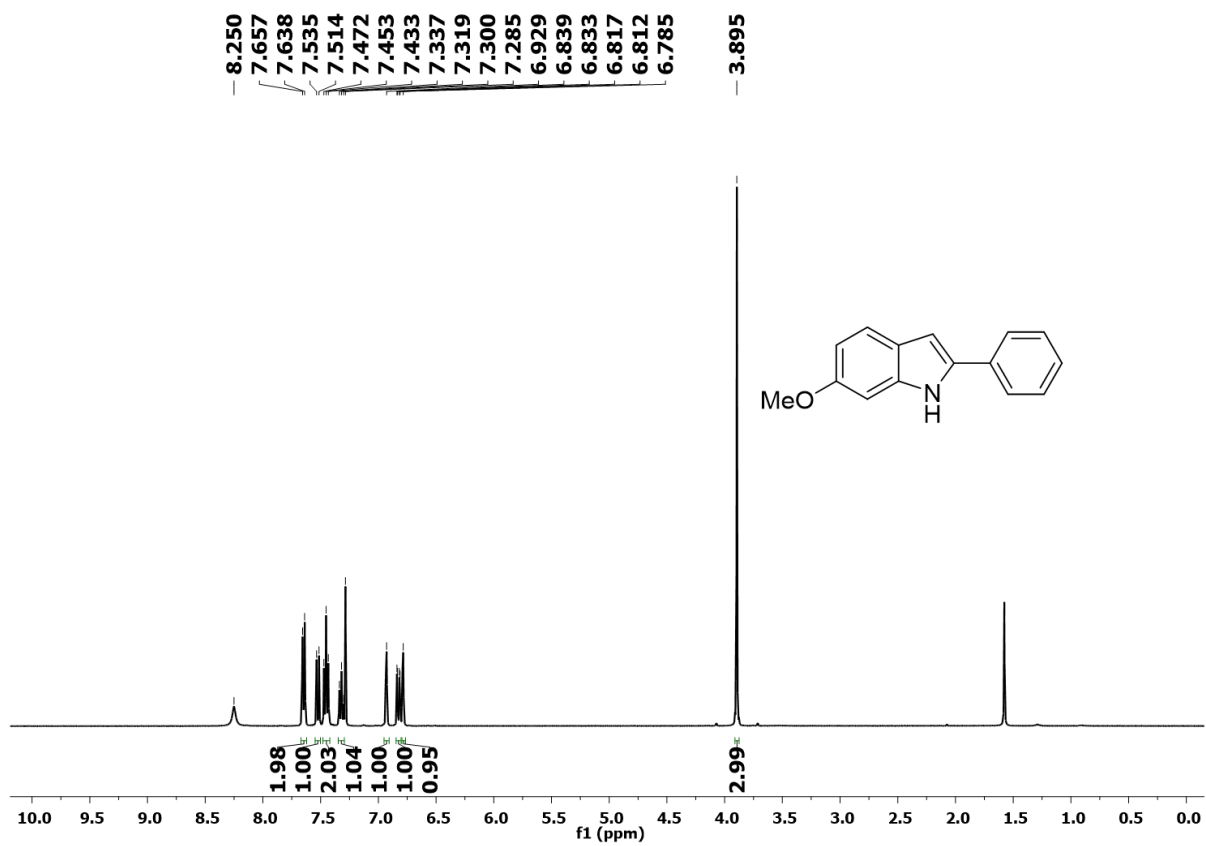

Figure 39S. 400 MHz <sup>1</sup>H-NMR spectrum of compound **3n** in CDCl<sub>3</sub>



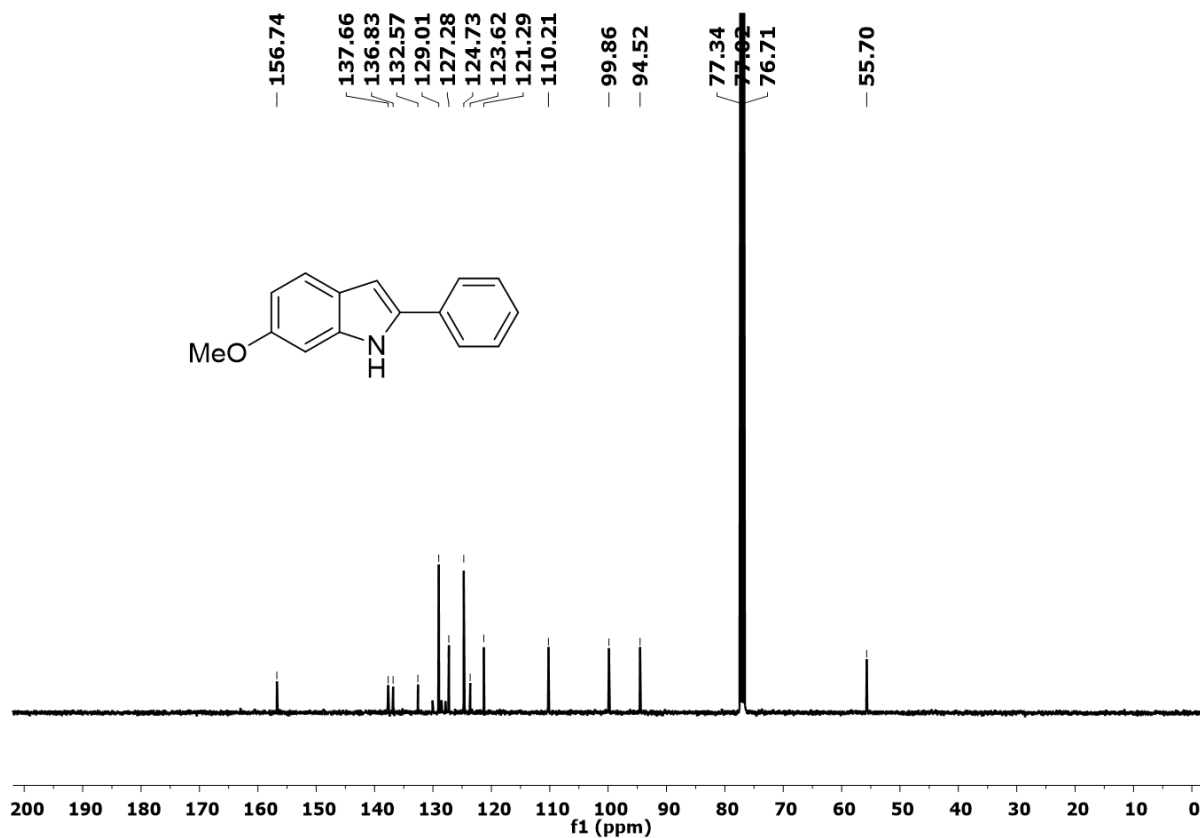

Figure 40S. 101 MHz <sup>13</sup>C-NMR spectrum of compound **3n** in CDCl<sub>3</sub>

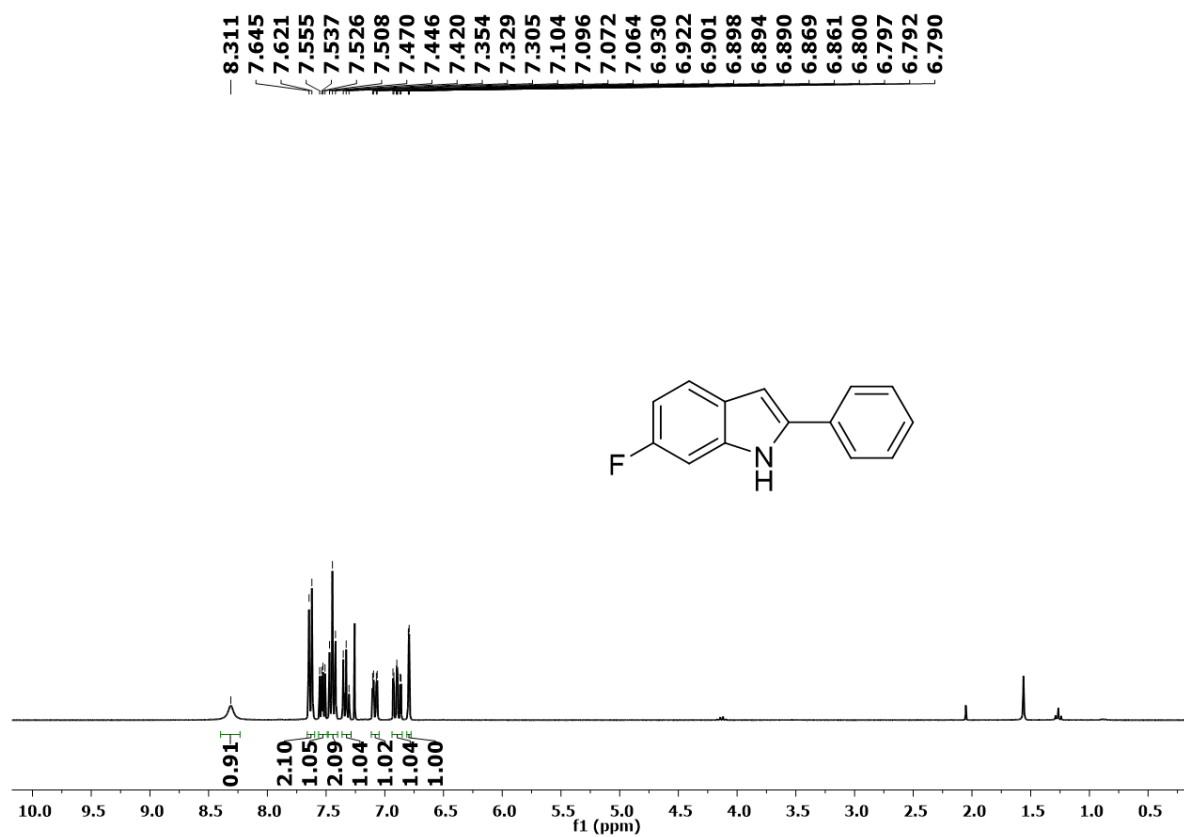

Figure 41S. 300 MHz <sup>1</sup>H-NMR spectrum of compound **3o** in CDCl<sub>3</sub>

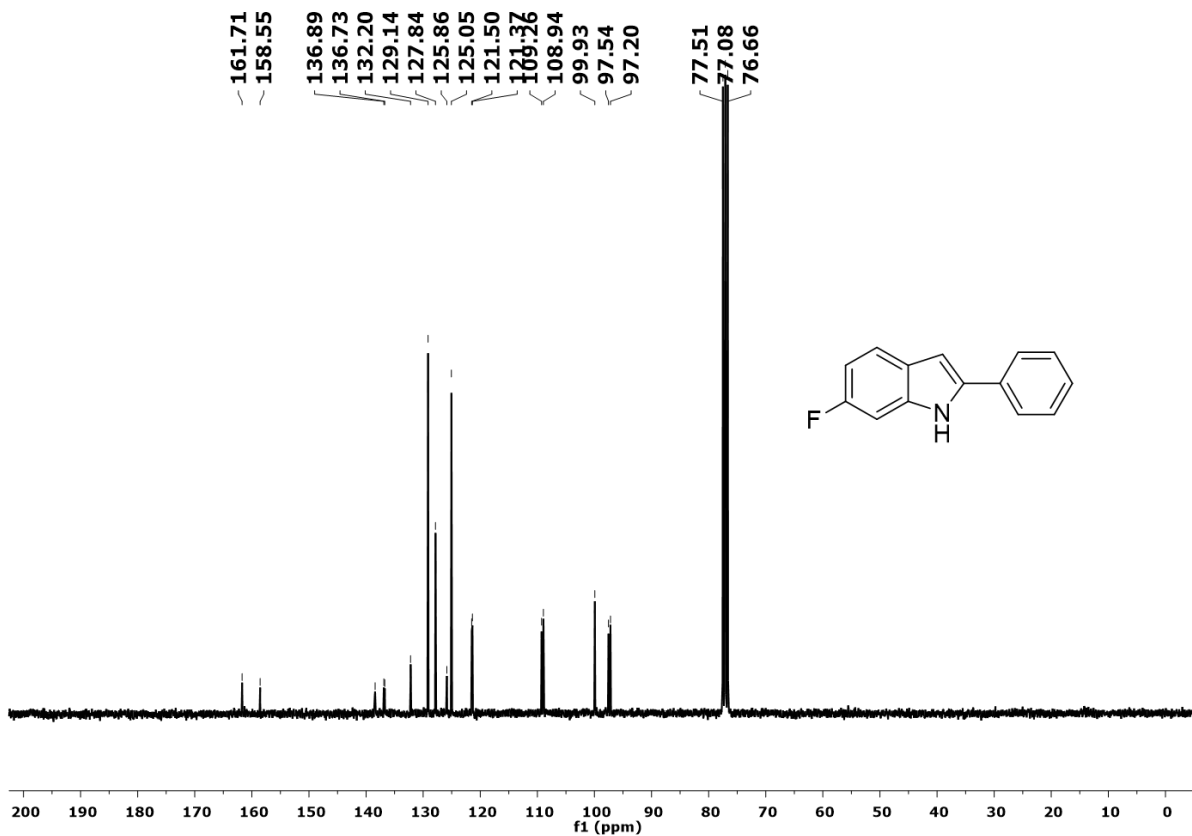

Figure 42S. 75 MHz  $^{13}\text{C-NMR}$  spectrum of compound **3o** in  $\text{CDCl}_3$

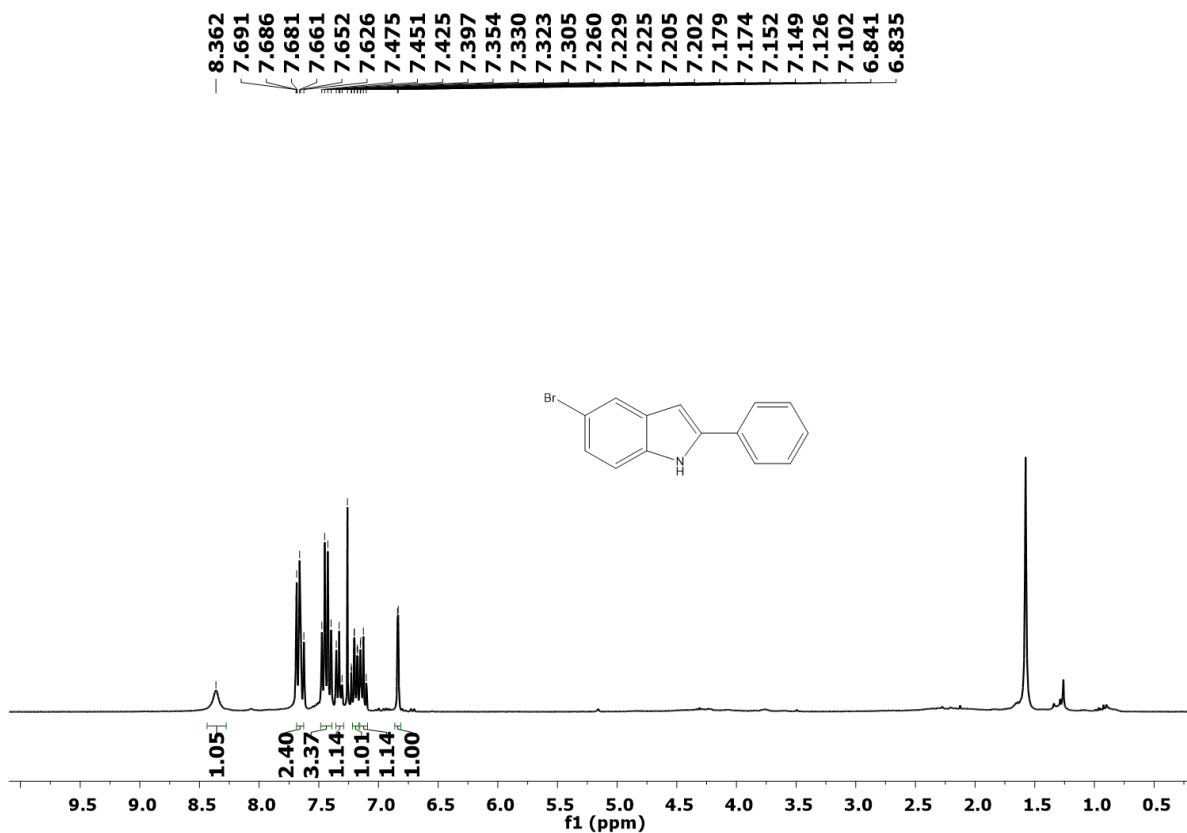

Figure 43S. 300 MHz  $^1\text{H-NMR}$  spectrum of compound **3p** in  $\text{CDCl}_3$

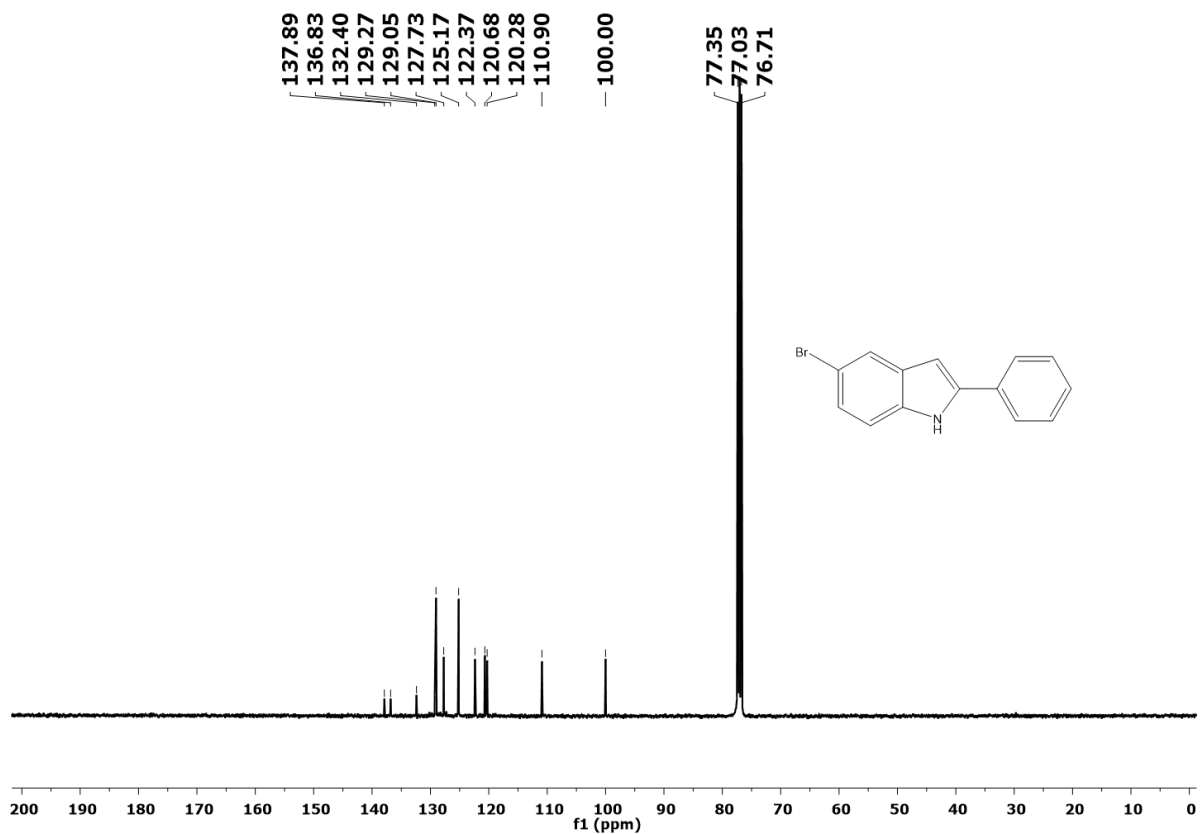

Figure 44S. 101 MHz  $^{13}\text{C-NMR}$  spectrum of compound **3p** in  $\text{CDCl}_3$

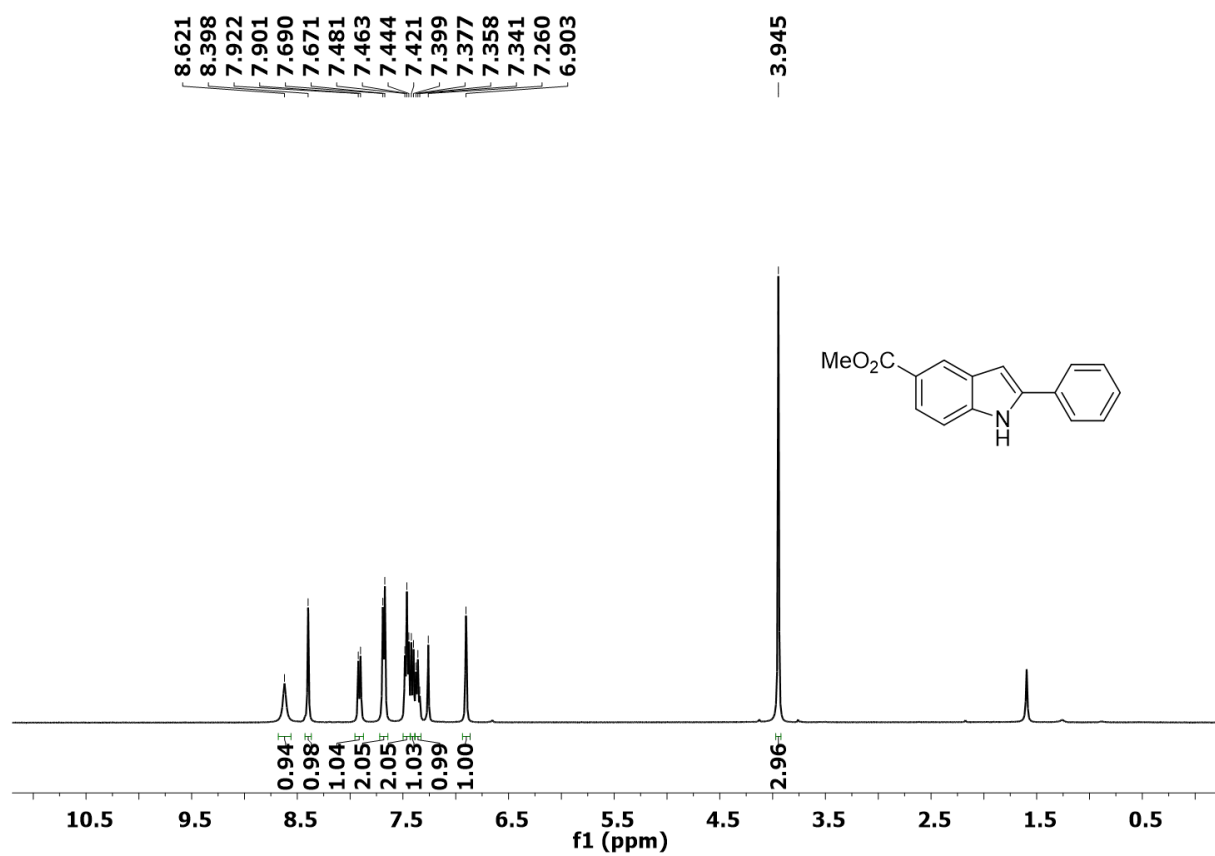

Figure 45S. 400 MHz  $^1\text{H-NMR}$  spectrum of compound **3q** in  $\text{CDCl}_3$

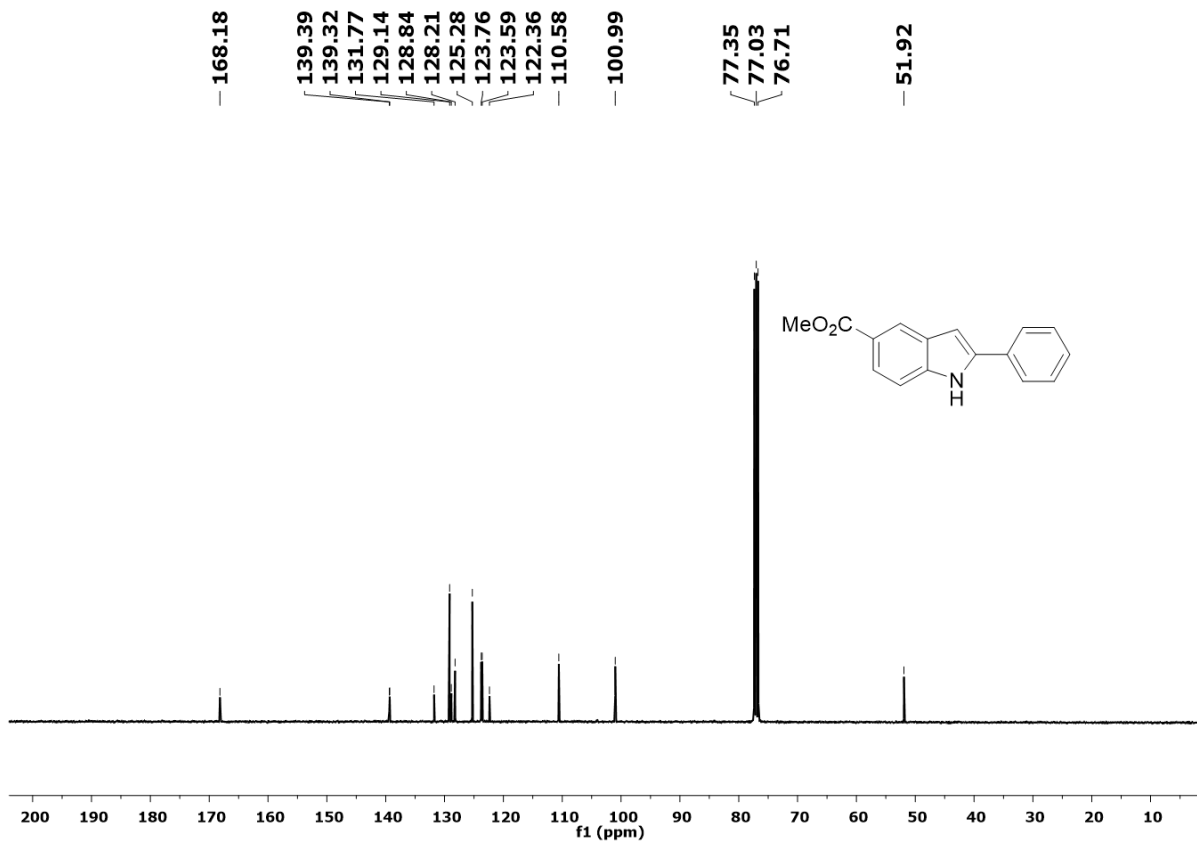

Figure 46S. 101 MHz <sup>13</sup>C-NMR spectrum of compound **3q** in CDCl<sub>3</sub>

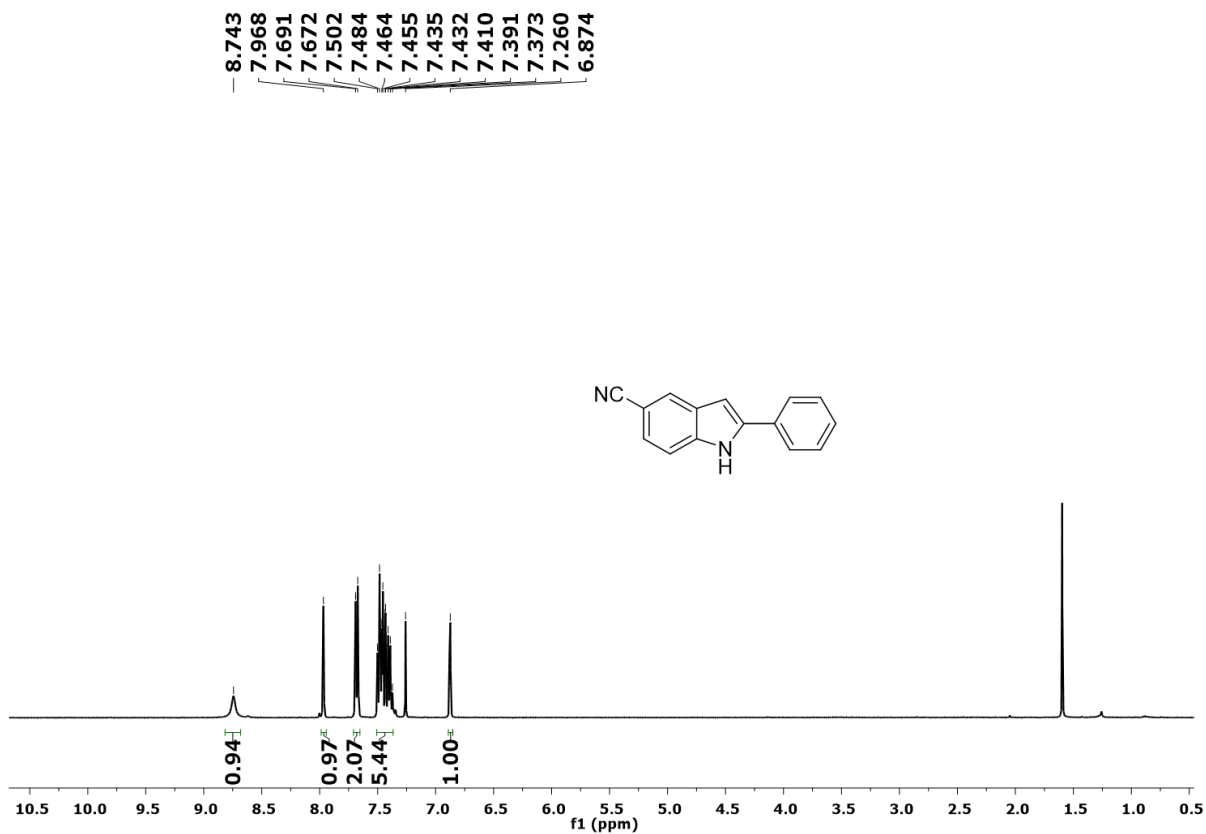

Figure 47S. 400 MHz <sup>1</sup>H-NMR spectrum of compound **3r** in CDCl<sub>3</sub>

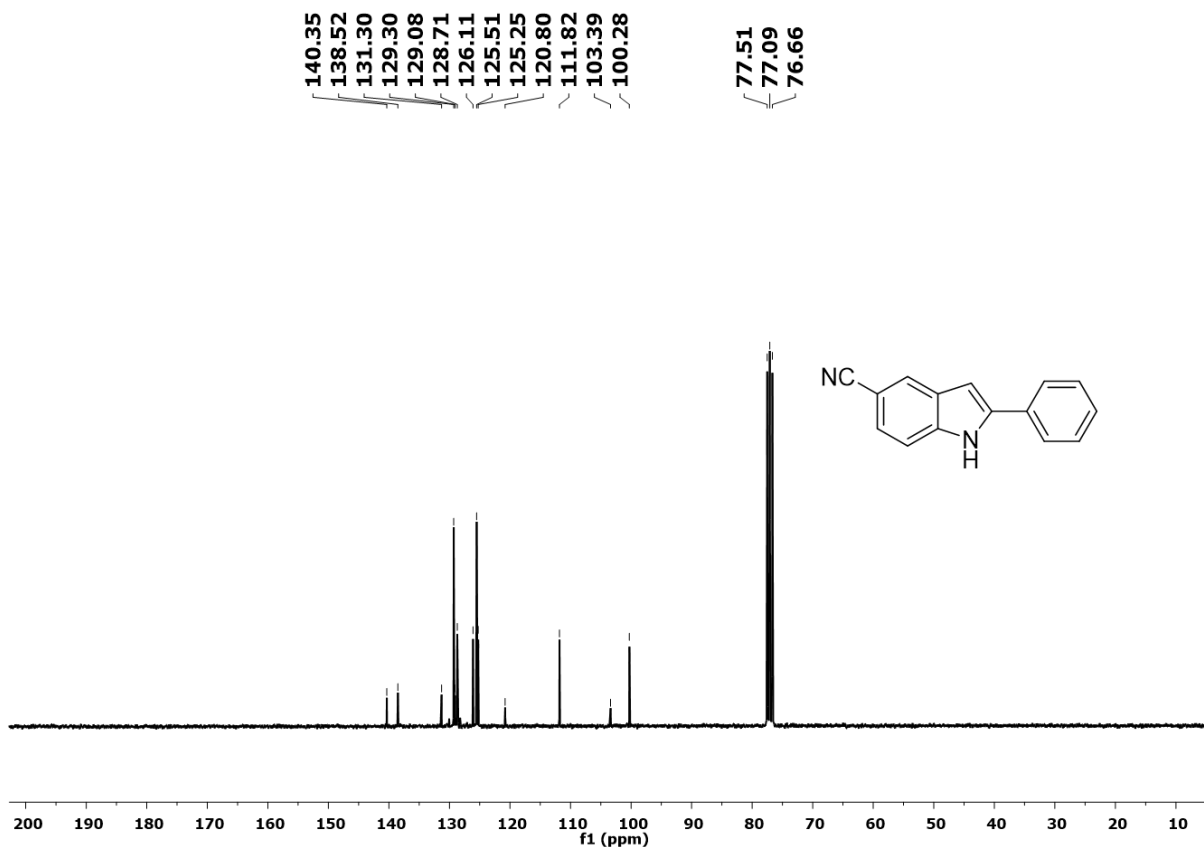

Figure 48S. 75 MHz  $^{13}\text{C}$ -NMR spectrum of compound **3r** in  $\text{CDCl}_3$

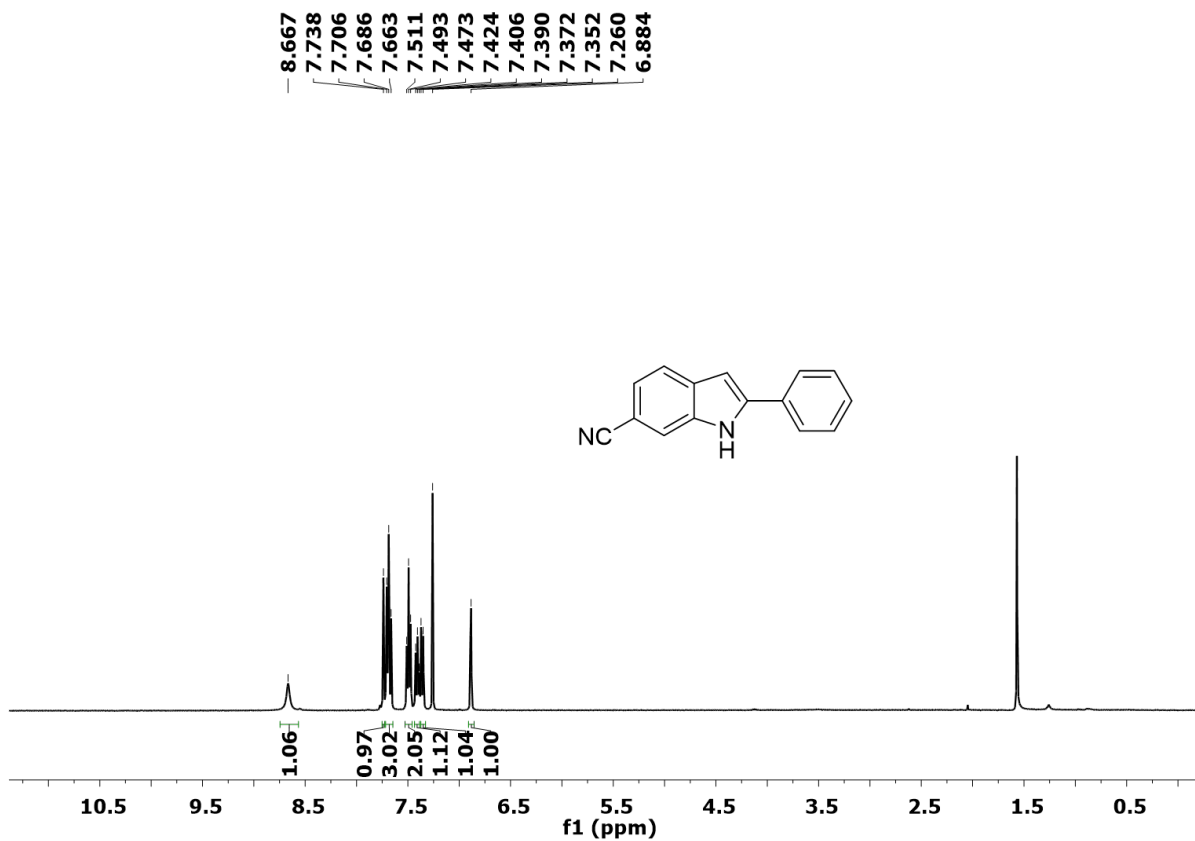

Figure 49S. 400 MHz  $^1\text{H}$ -NMR spectrum of compound **3s** in  $\text{CDCl}_3$

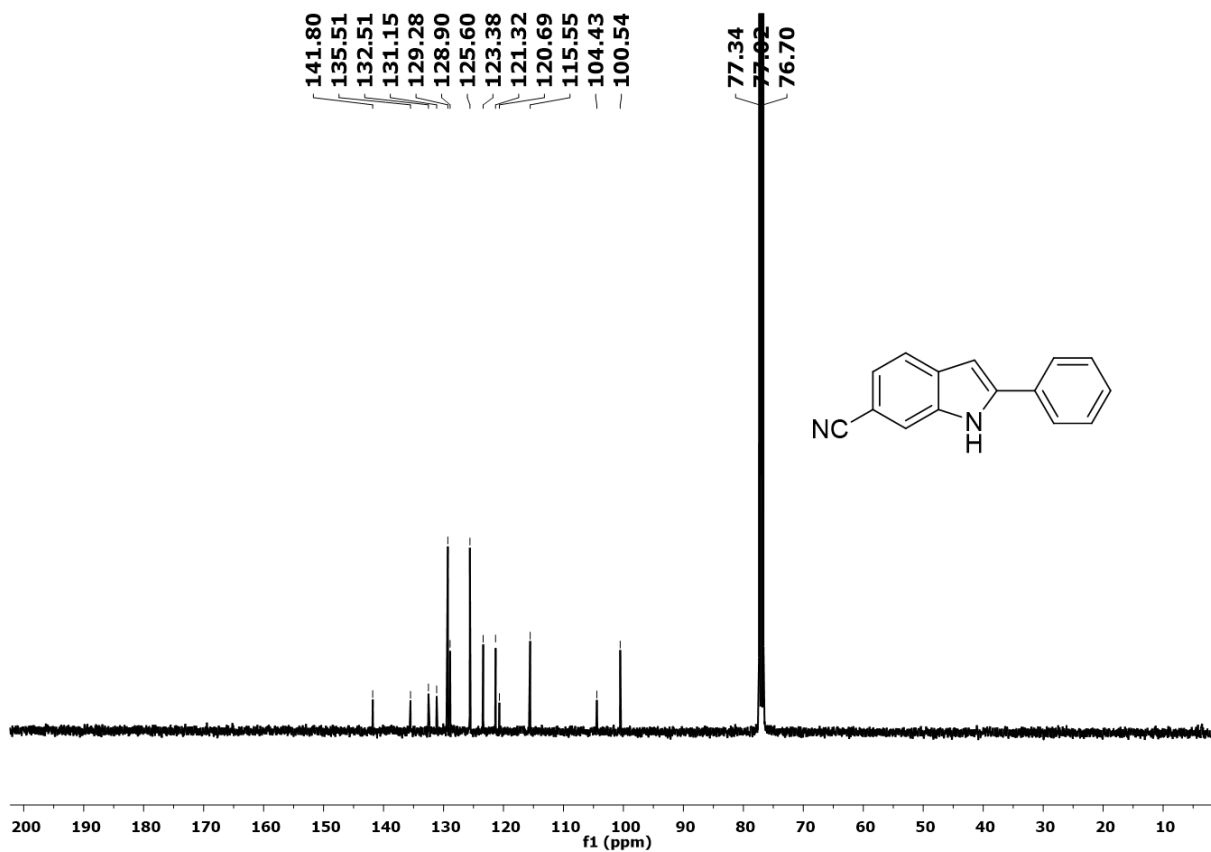

Figure 50S. 101 MHz <sup>13</sup>C-NMR spectrum of compound **3s** in CDCl<sub>3</sub>

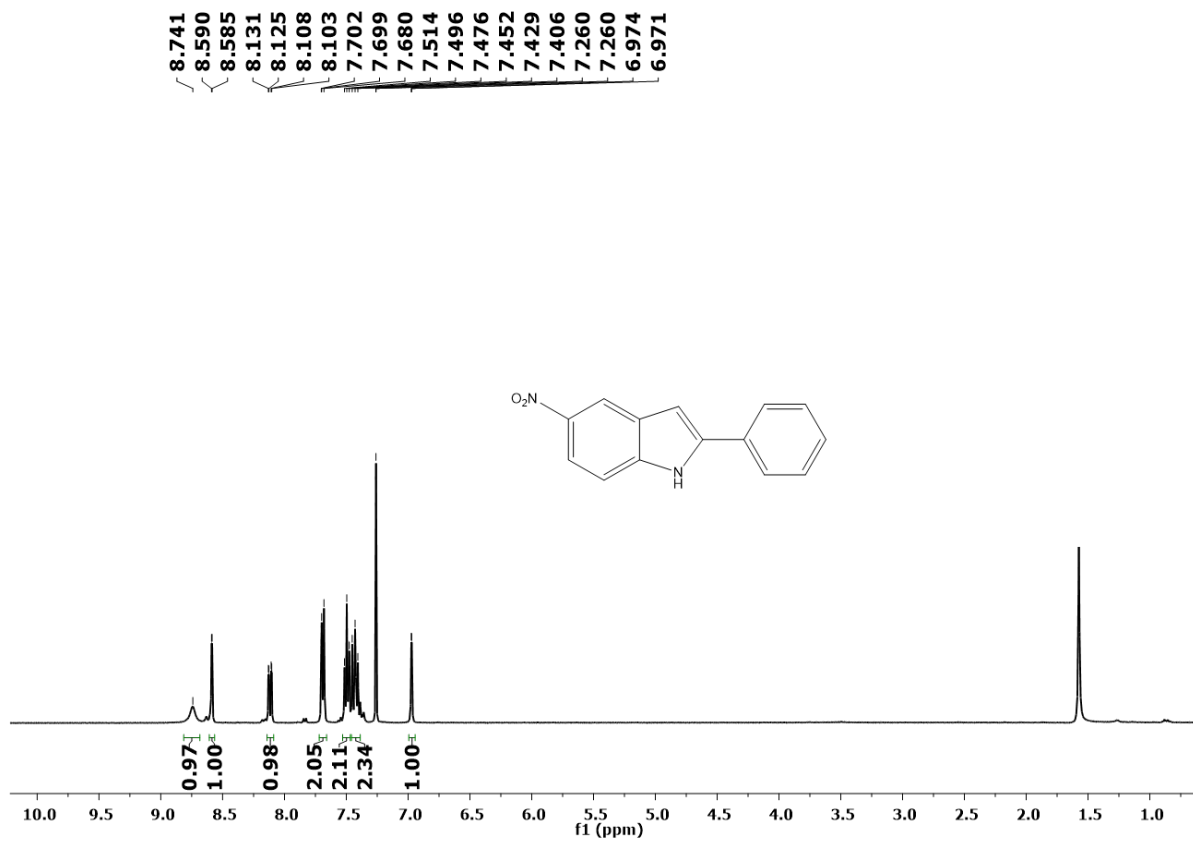

Figure 51S. 400 MHz <sup>1</sup>H-NMR spectrum of compound **3t** in CDCl<sub>3</sub>

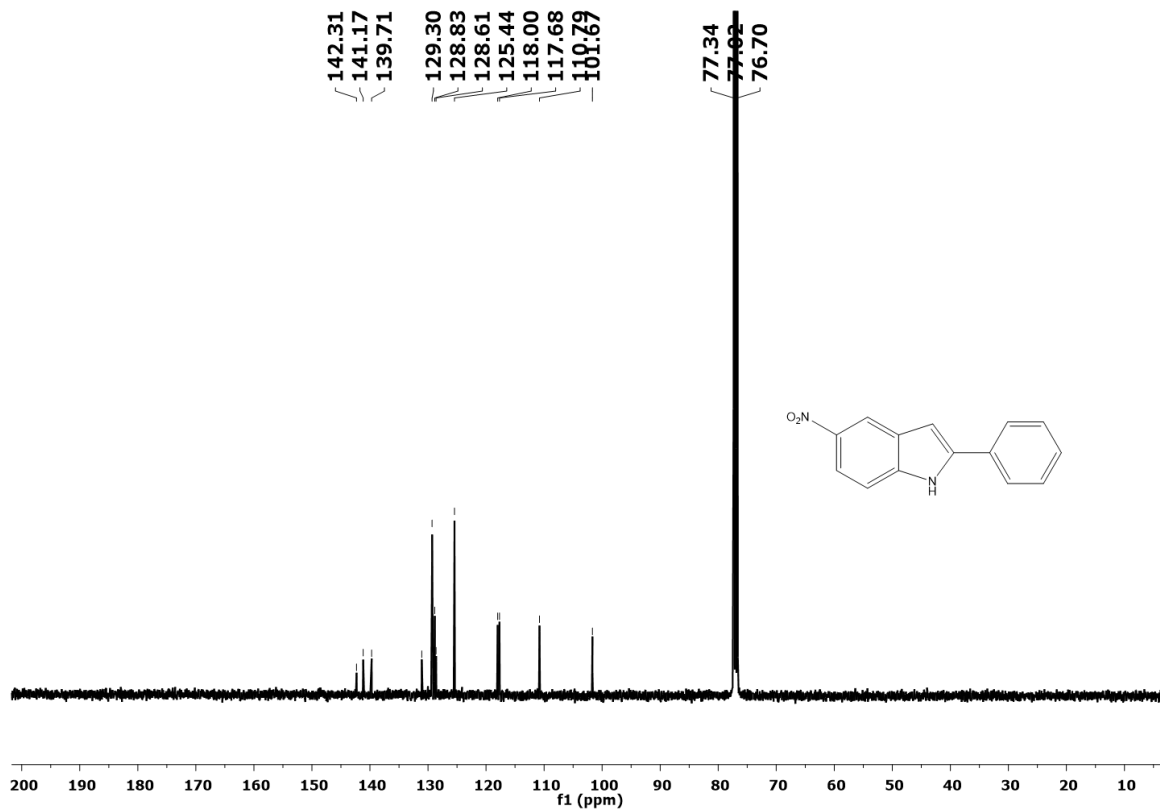

Figure 52S. 101 MHz  $^{13}\text{C-NMR}$  spectrum of compound **3t** in  $\text{CDCl}_3$

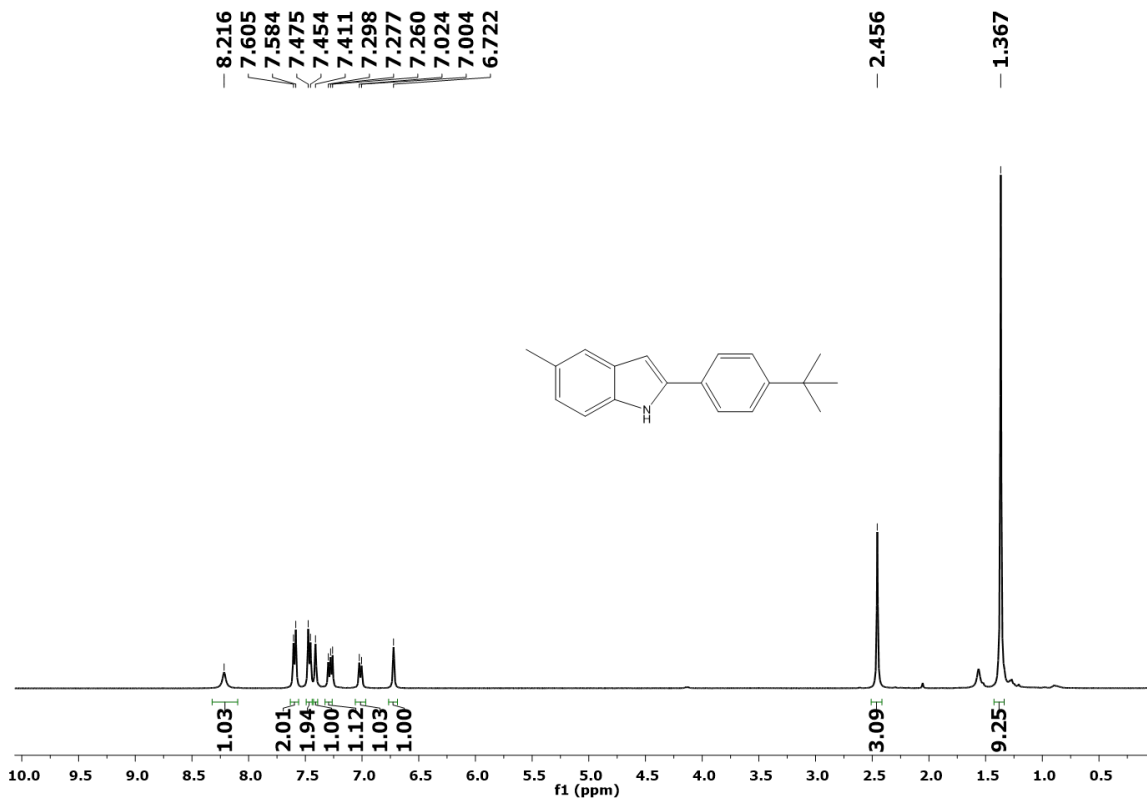

Figure 53S. 400 MHz  $^1\text{H-NMR}$  spectrum of compound **3u** in  $\text{CDCl}_3$

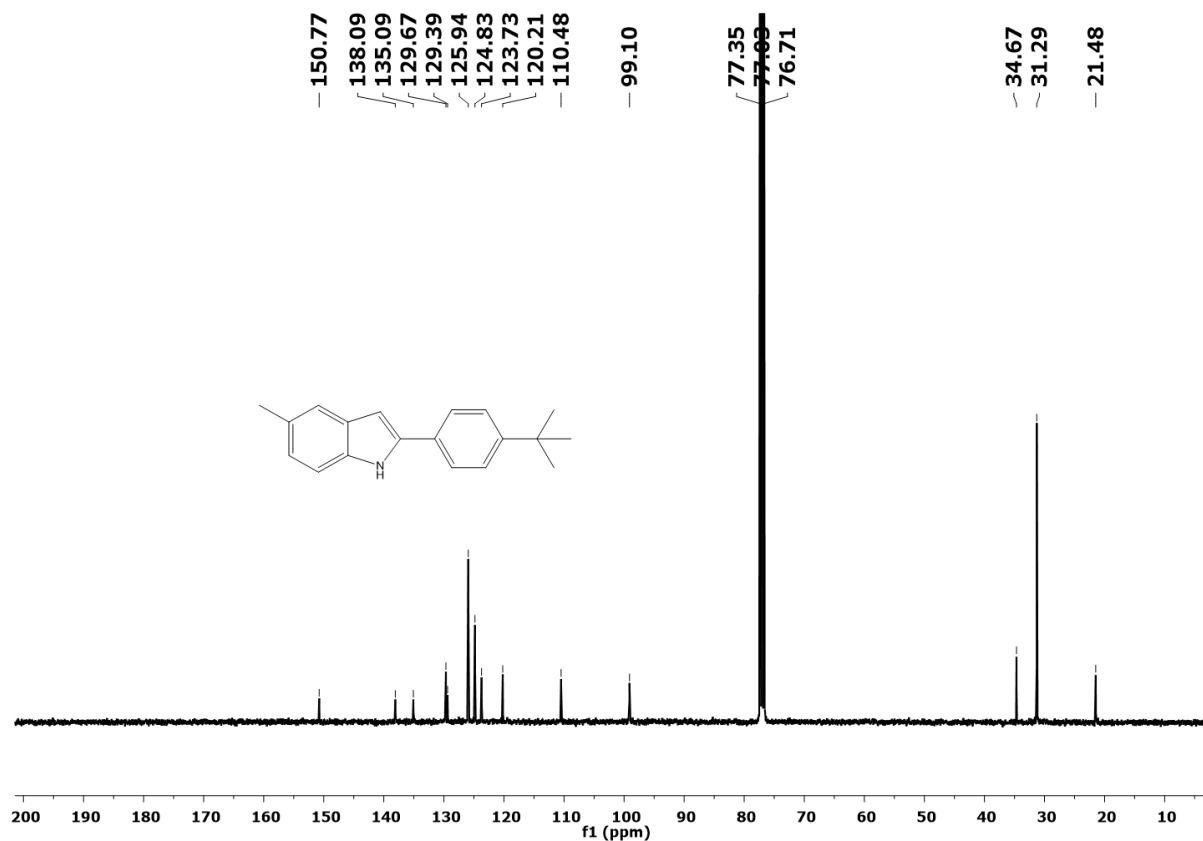

Figure 54S. 101 MHz  $^{13}\text{C-NMR}$  spectrum of compound **3u** in  $\text{CDCl}_3$

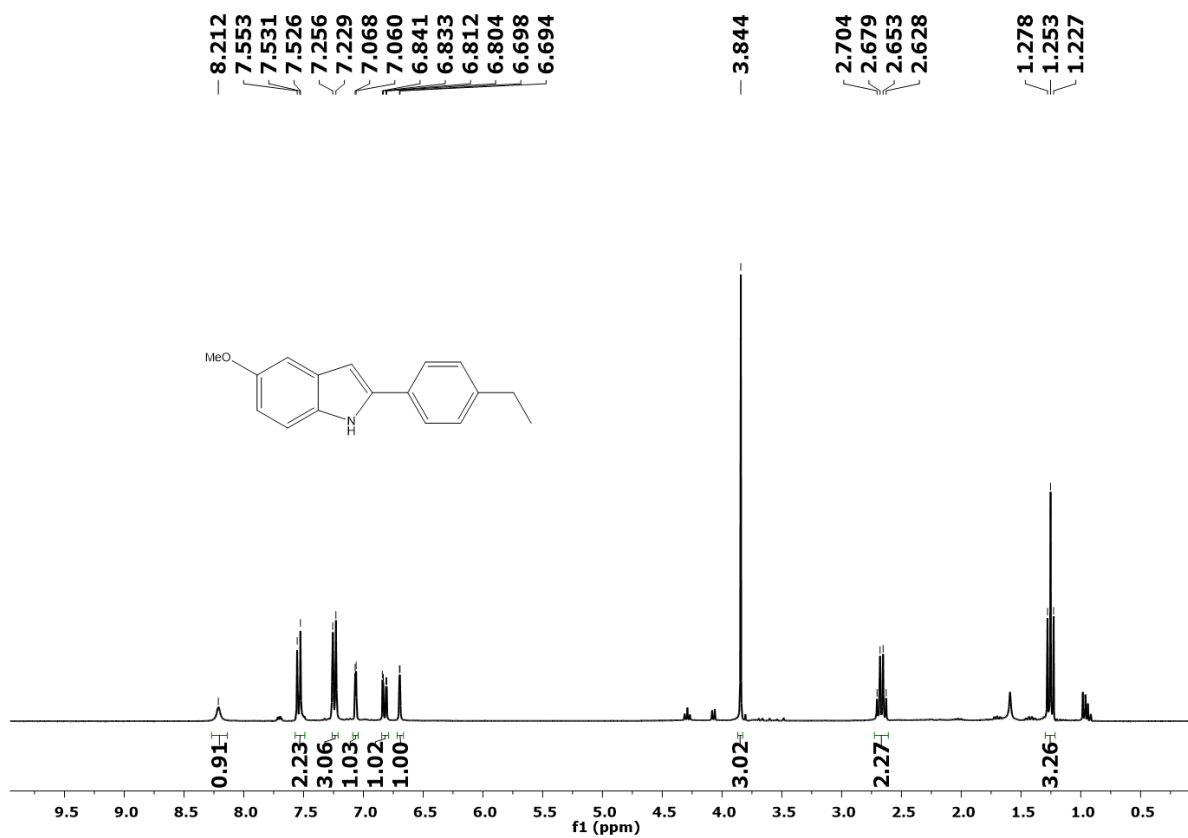

Figure 55S. 300 MHz  $^1\text{H-NMR}$  spectrum of compound **3v** in  $\text{CDCl}_3$



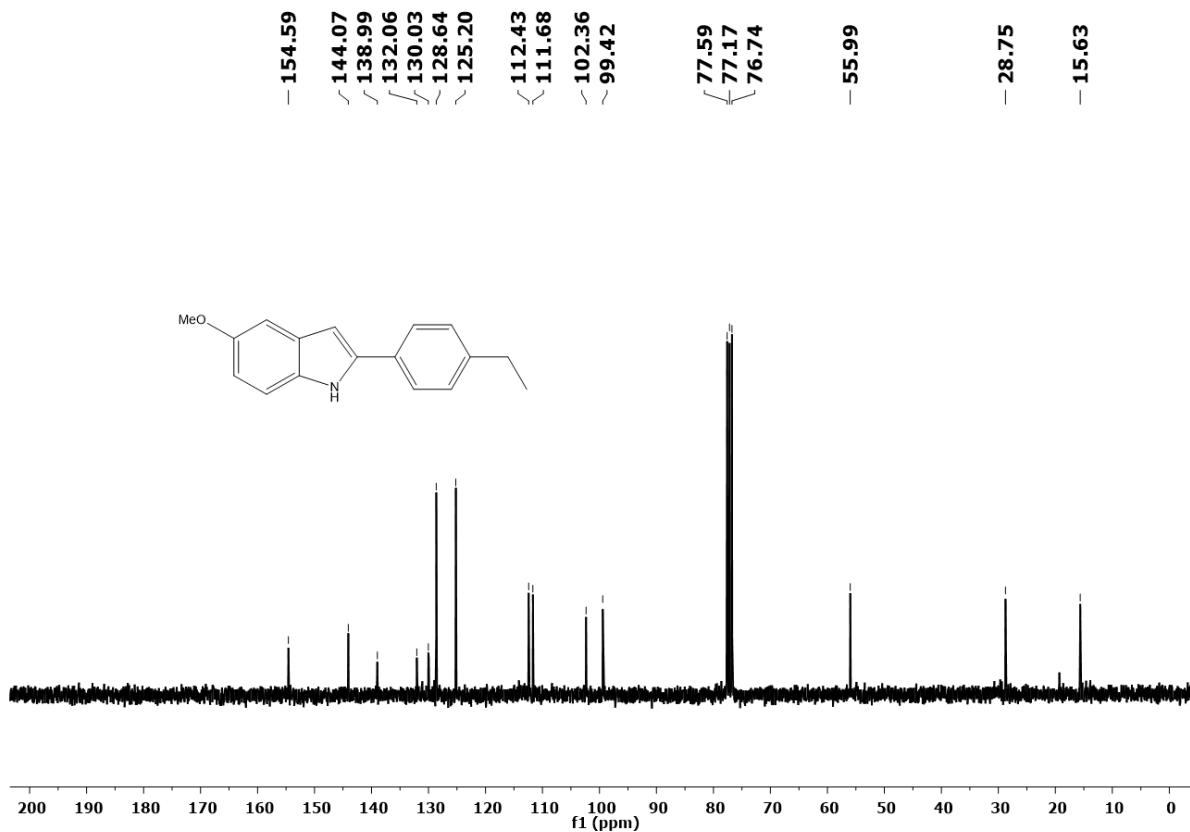

Figure 56S. 75 MHz  $^{13}\text{C}$ -NMR spectrum of compound **3v** in  $\text{CDCl}_3$

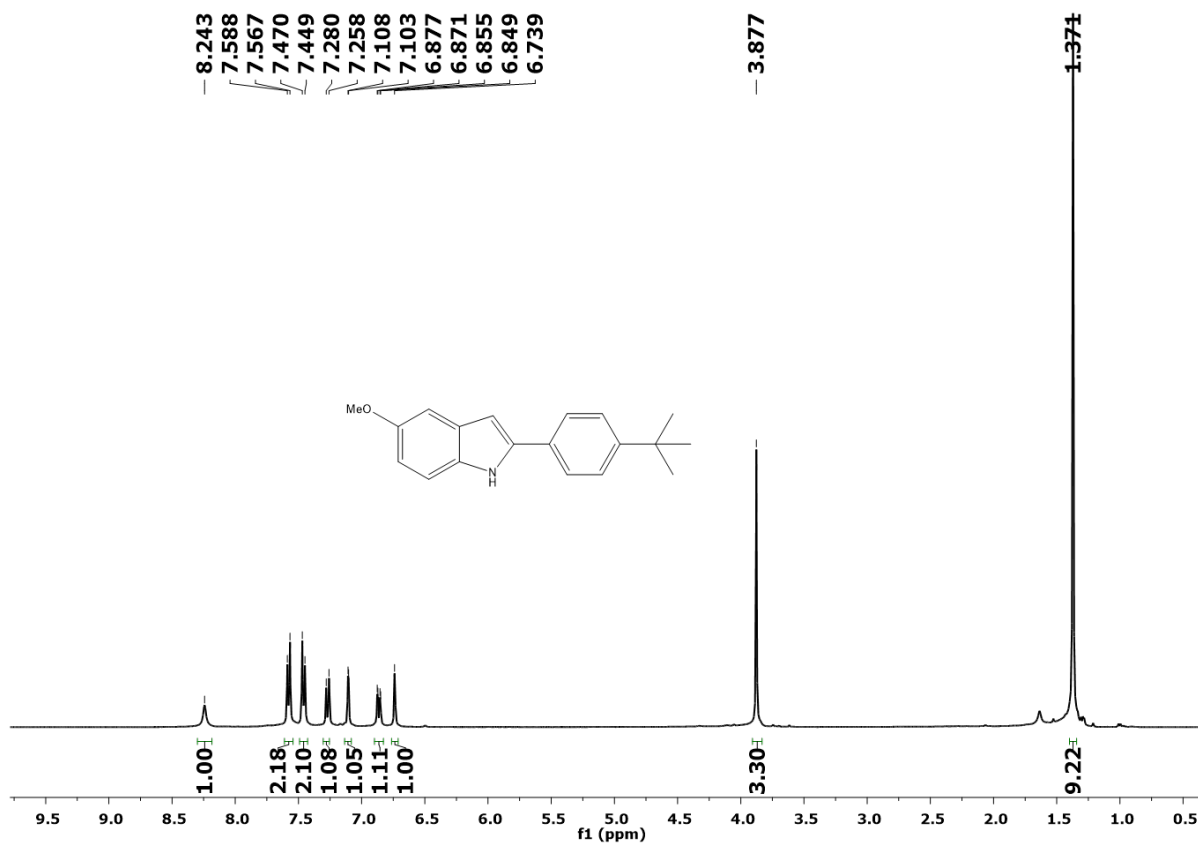

Figure 57S. 400 MHz  $^1\text{H}$ -NMR spectrum of compound **3w** in  $\text{CDCl}_3$

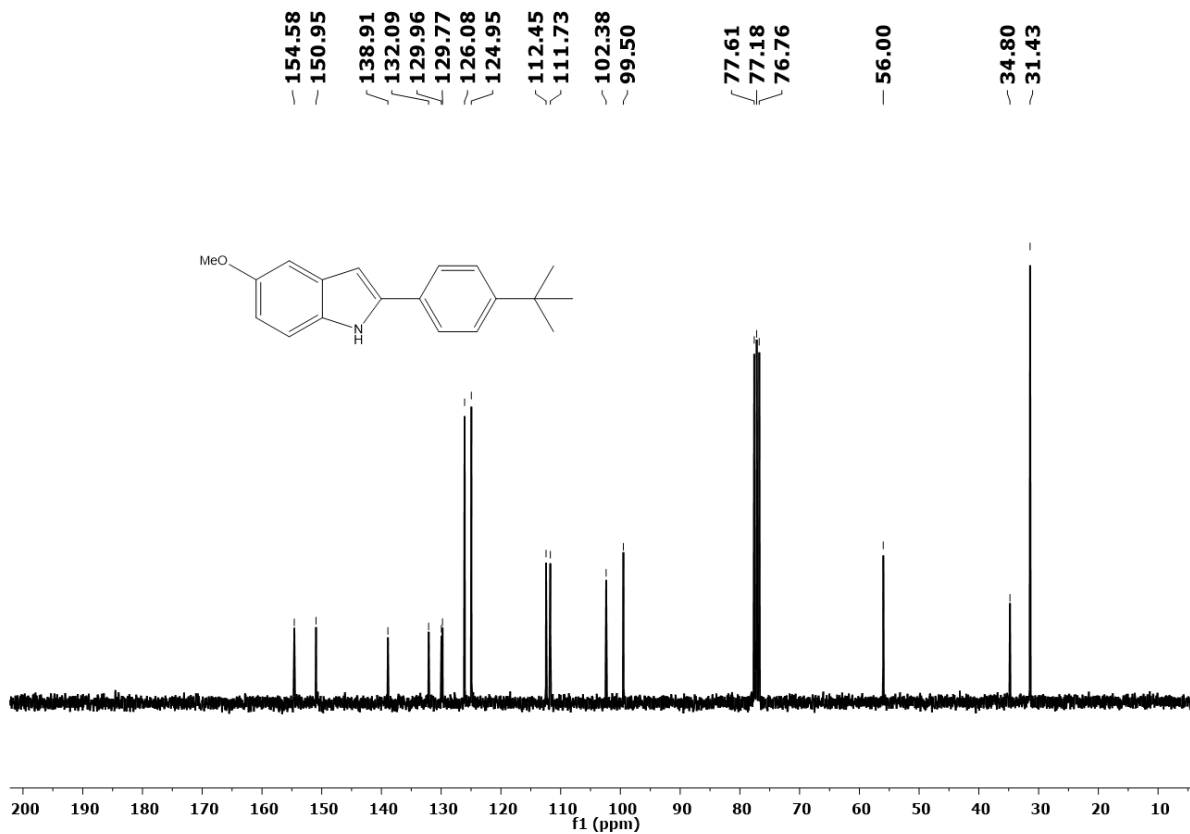

Figure 58S. 75 MHz  $^{13}\text{C-NMR}$  spectrum of compound **3w** in  $\text{CDCl}_3$

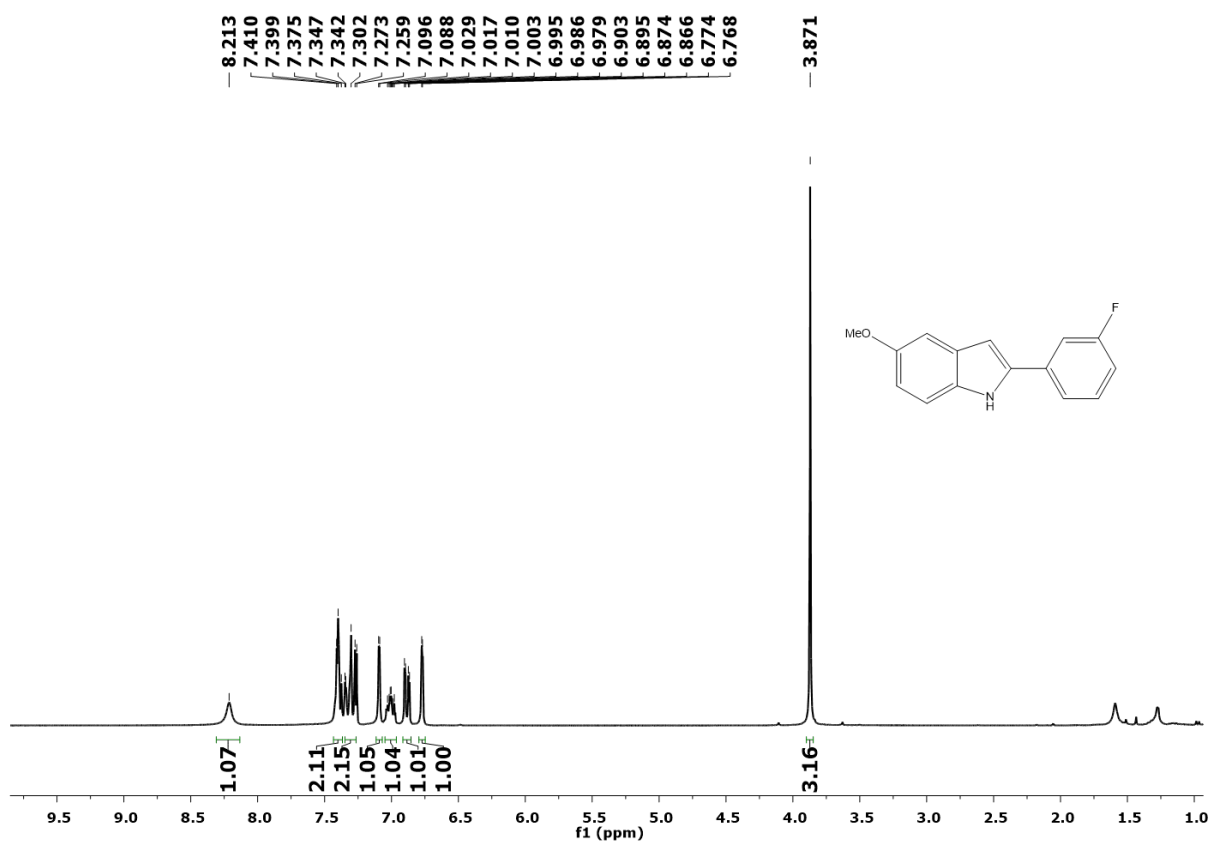

Figure 59S. 300 MHz  $^1\text{H-NMR}$  spectrum of compound **3x** in  $\text{CDCl}_3$

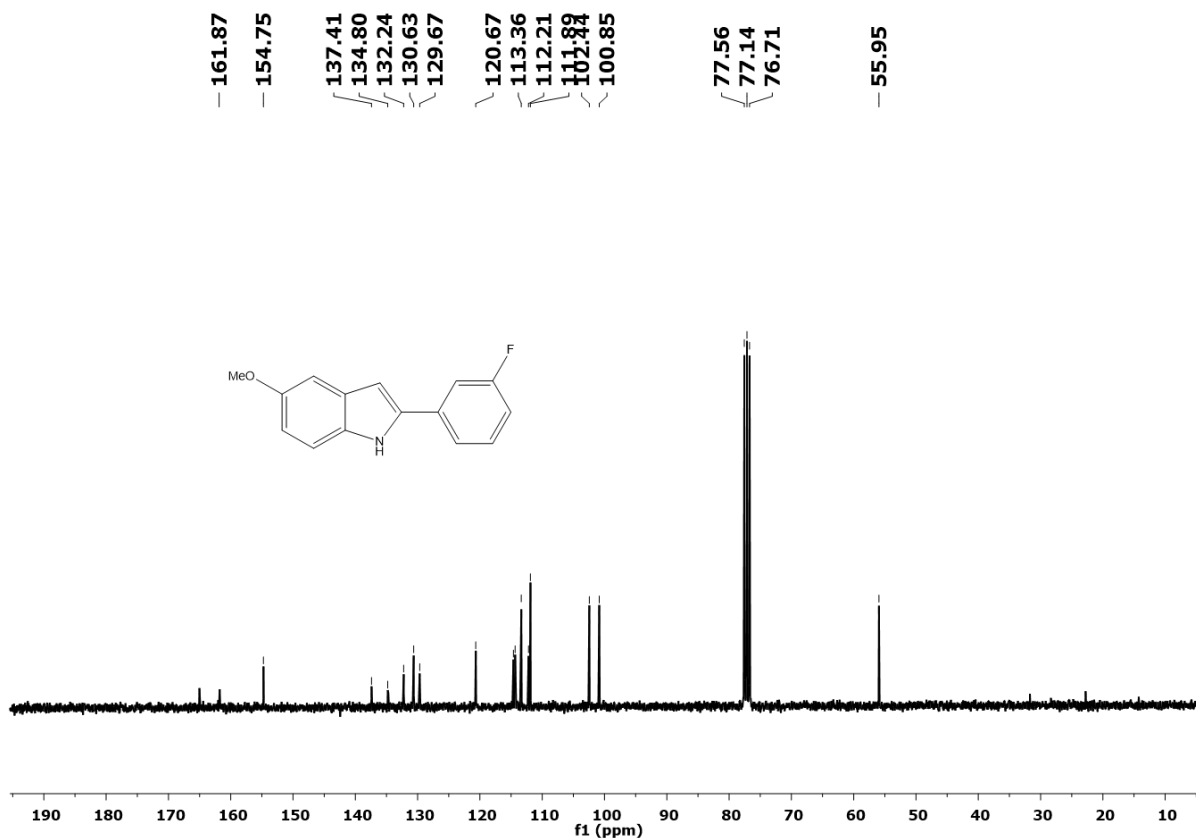

Figure 60S. 75 MHz  $^{13}\text{C-NMR}$  spectrum of compound **3x** in  $\text{CDCl}_3$

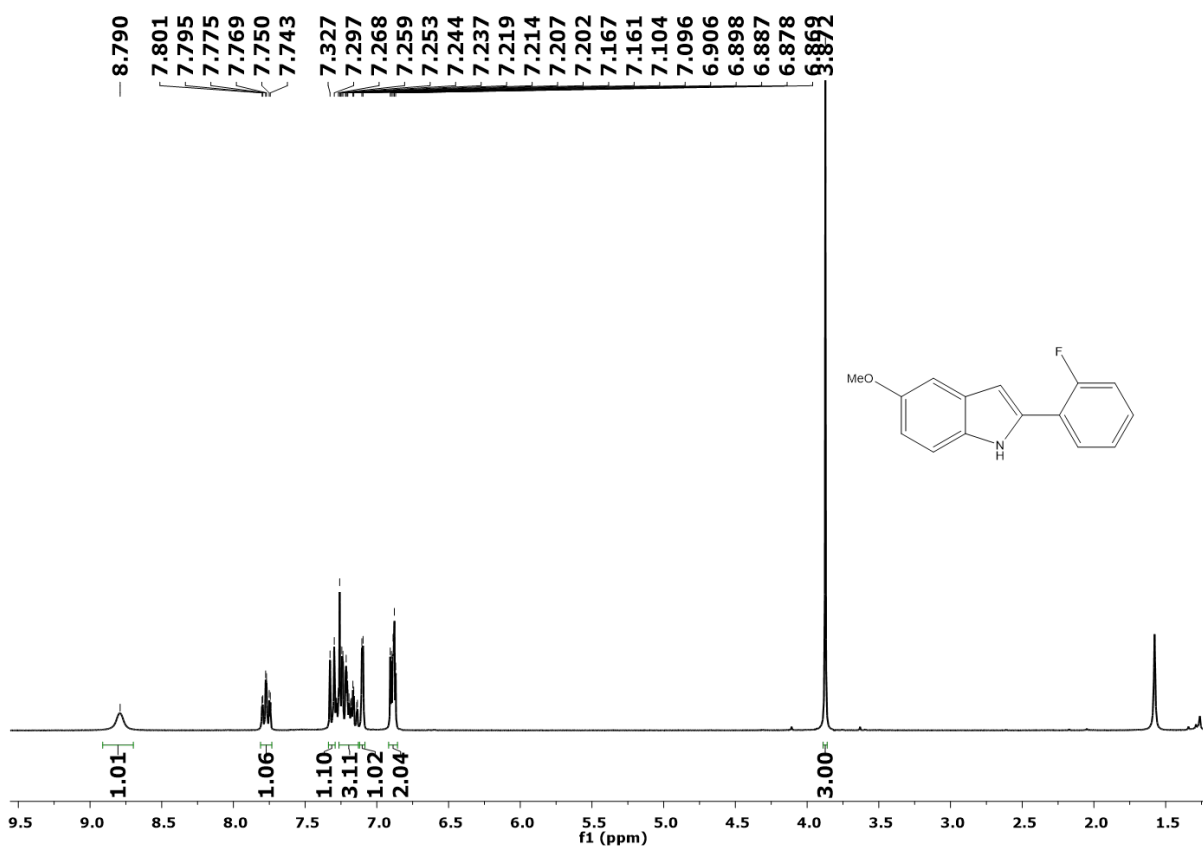

Figure 61S. 300 MHz  $^1\text{H-NMR}$  spectrum of compound **3y** in  $\text{CDCl}_3$

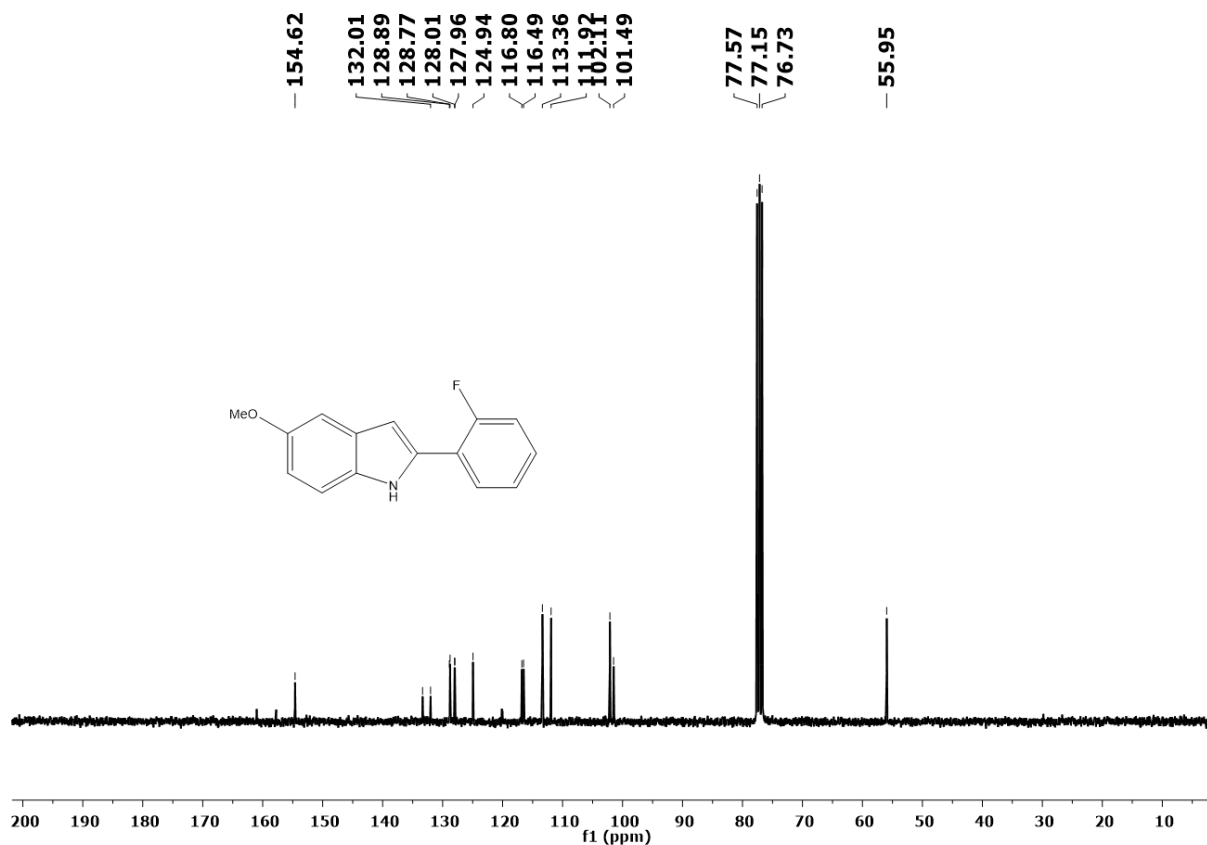

Figure 62S. 75 MHz  $^{13}\text{C-NMR}$  spectrum of compound **3y** in  $\text{CDCl}_3$

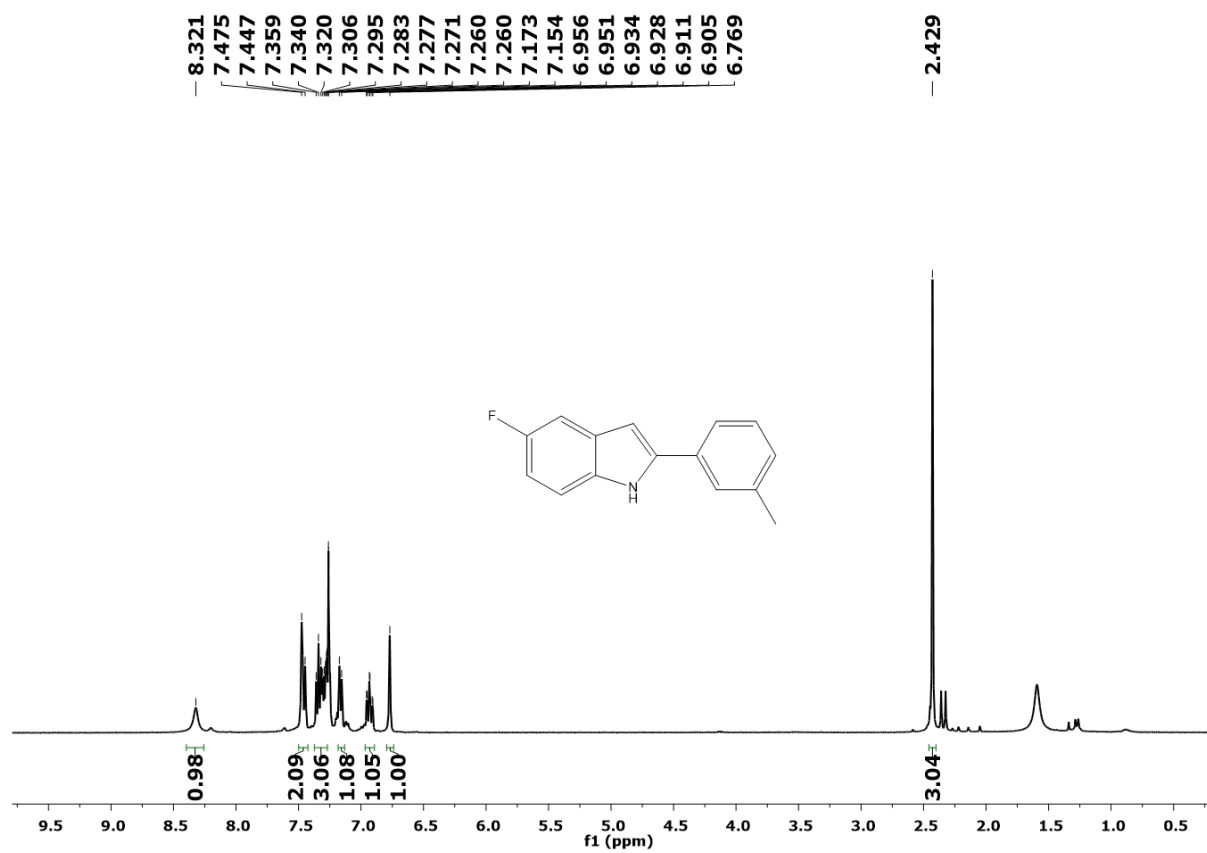

Figure 63S. 400 MHz  $^1\text{H-NMR}$  spectrum of compound **3z** in  $\text{CDCl}_3$

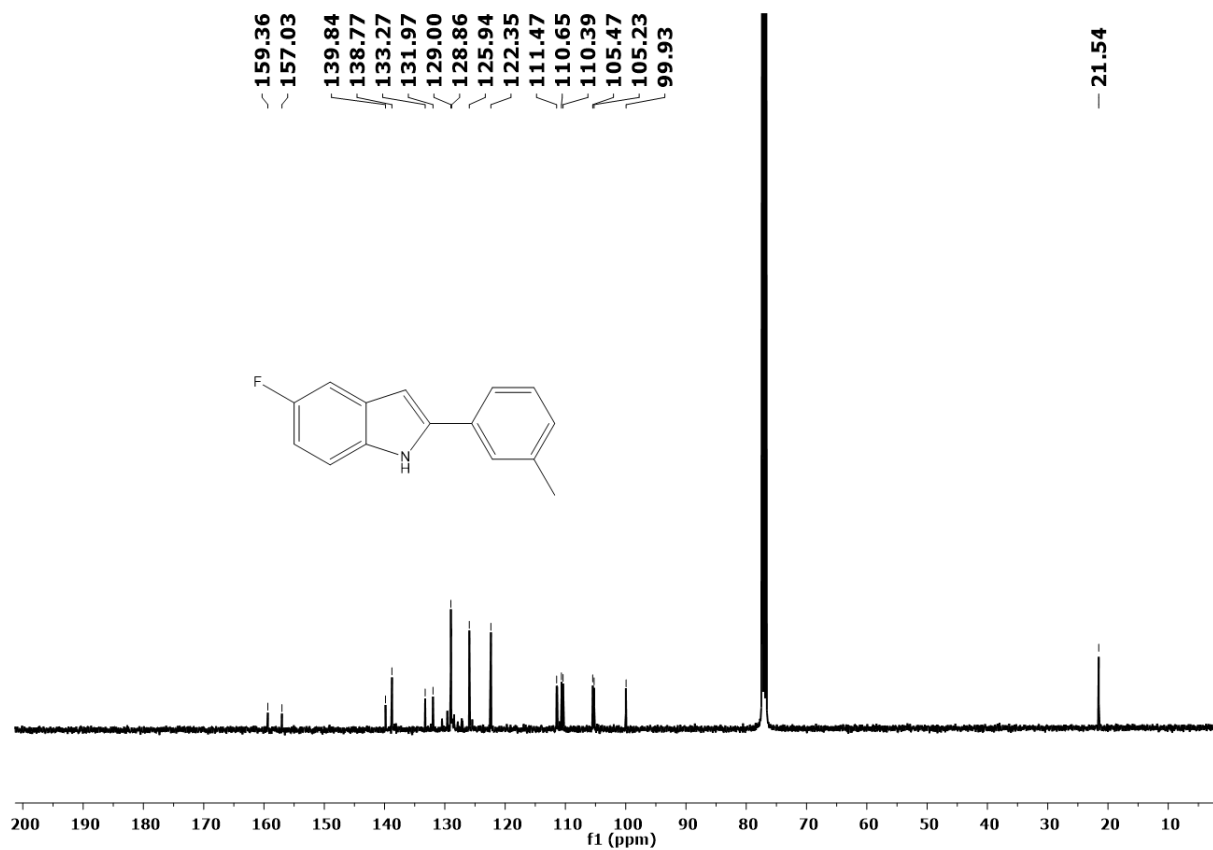

Figure 64S. 101 MHz  $^{13}\text{C-NMR}$  spectrum of compound **3z** in  $\text{CDCl}_3$

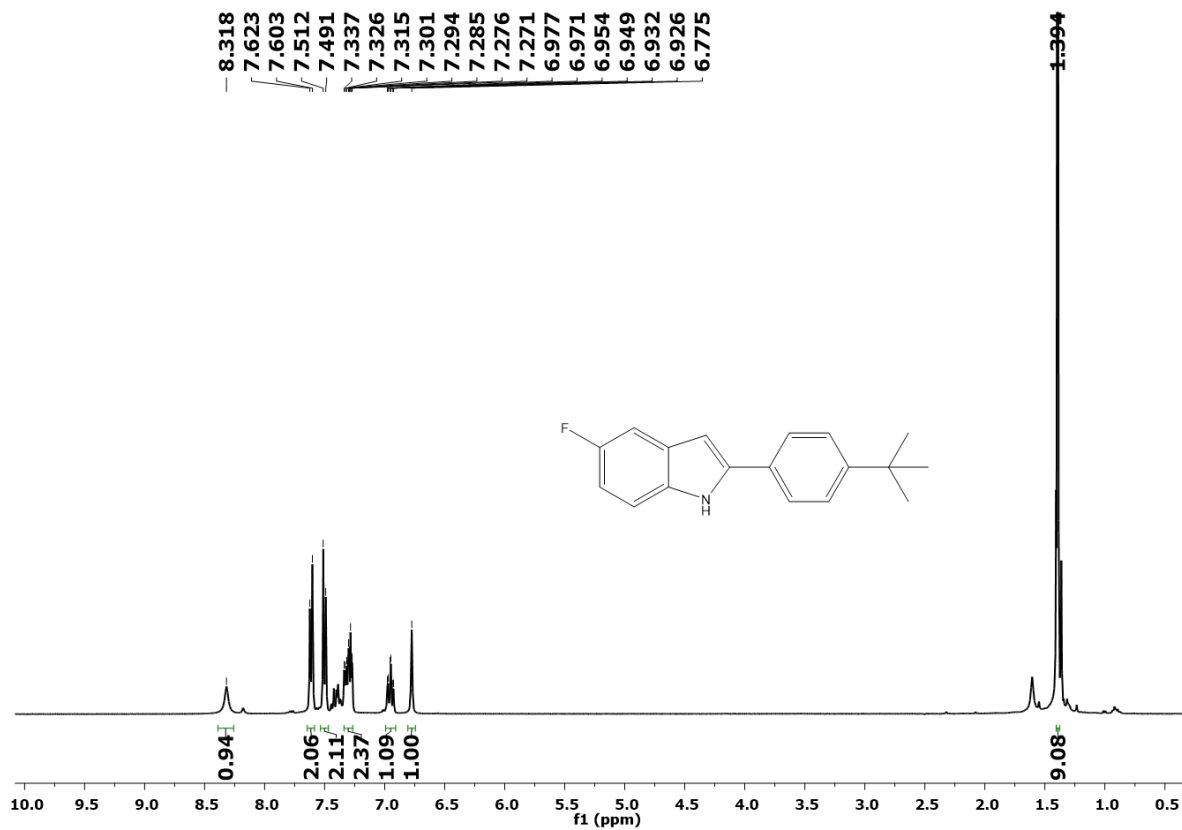

Figure 65S. 400 MHz  $^1\text{H-NMR}$  spectrum of compound **3aa** in  $\text{CDCl}_3$

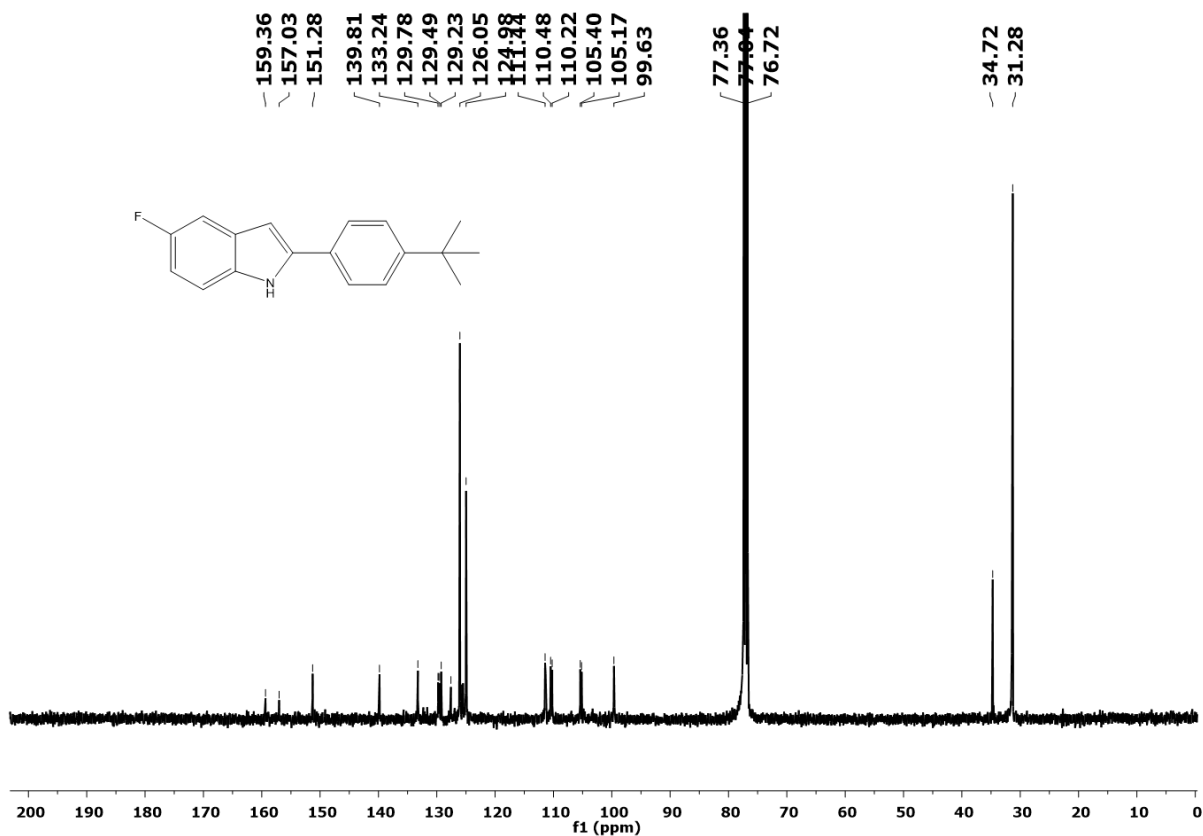

Figure 66S. 101 MHz  $^{13}\text{C-NMR}$  spectrum of compound **3aa** in  $\text{CDCl}_3$

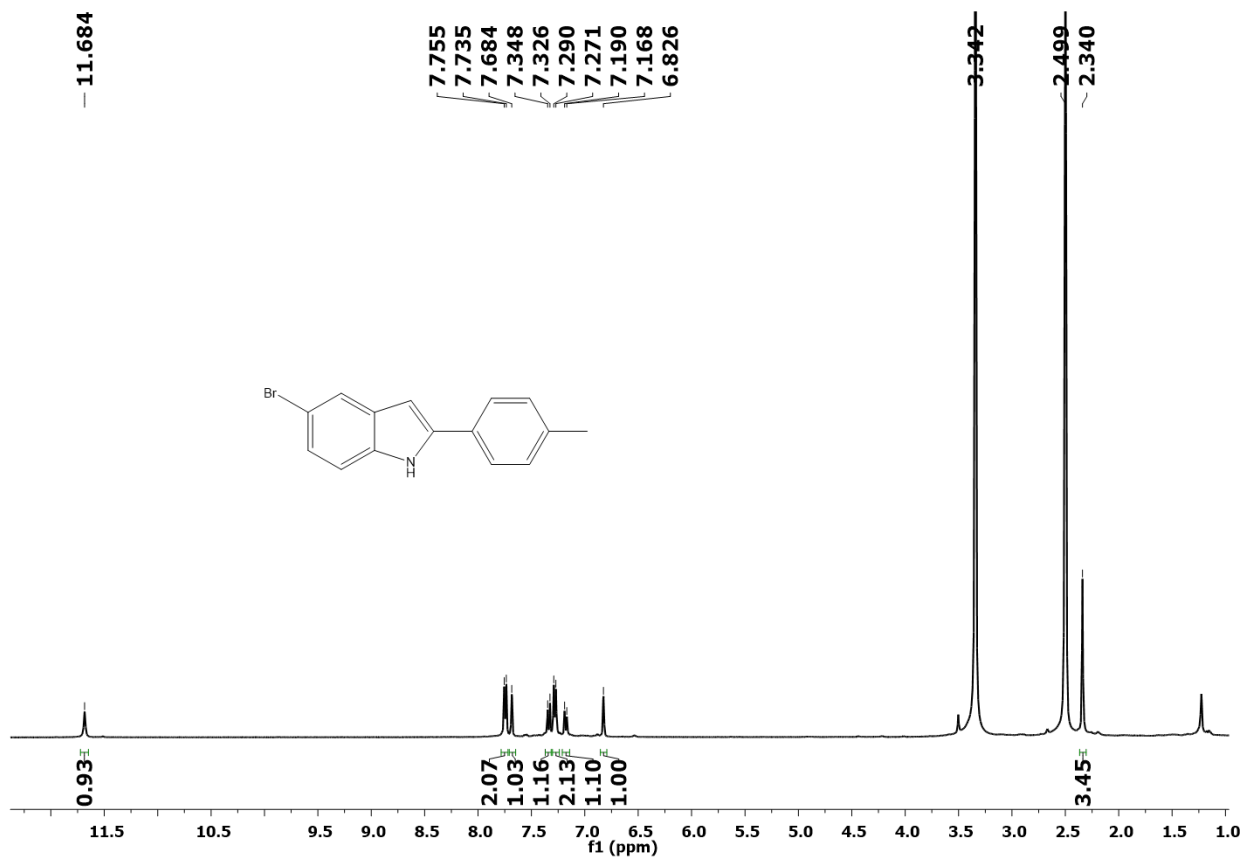

Figure 67S. 400 MHz  $^1\text{H-NMR}$  spectrum of compound **3ab** in  $\text{DMSO-d}_6$

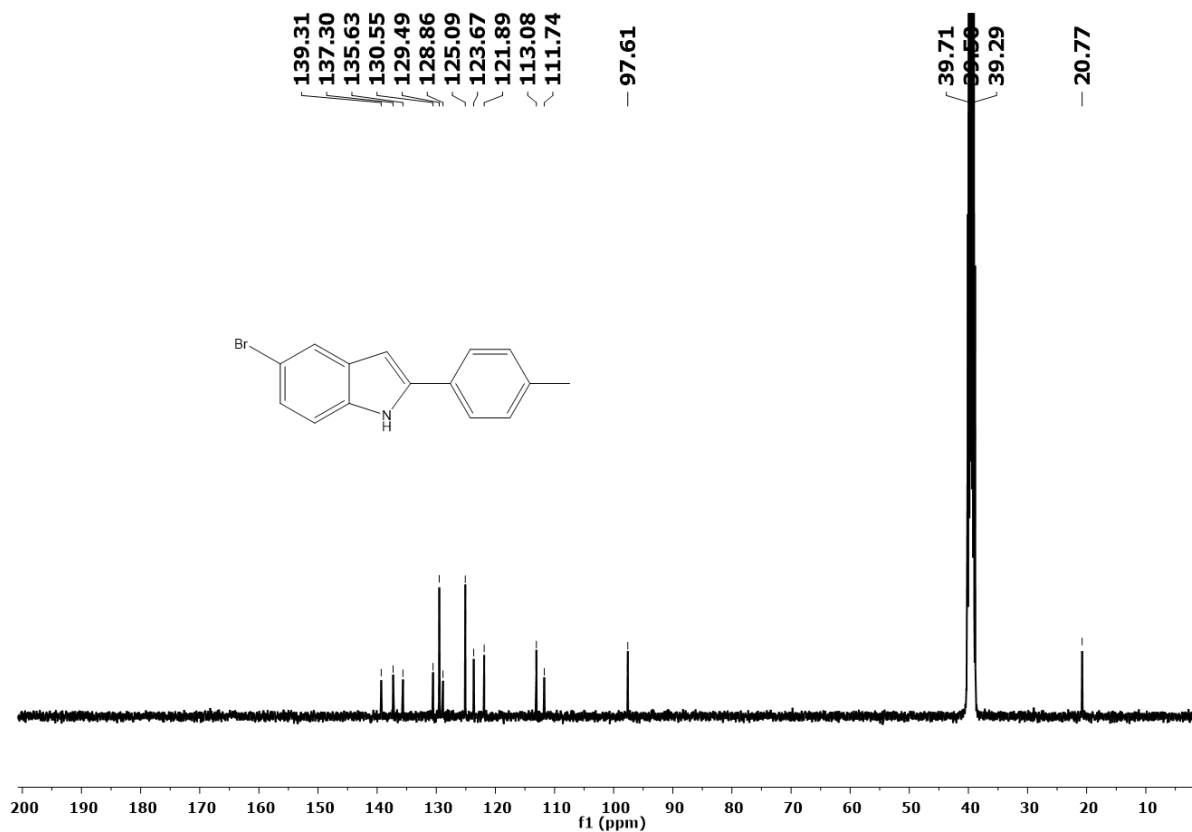

Figure 68S. 101 MHz  $^{13}\text{C-NMR}$  spectrum of compound **3ab** in  $\text{DMSO-d}_6$

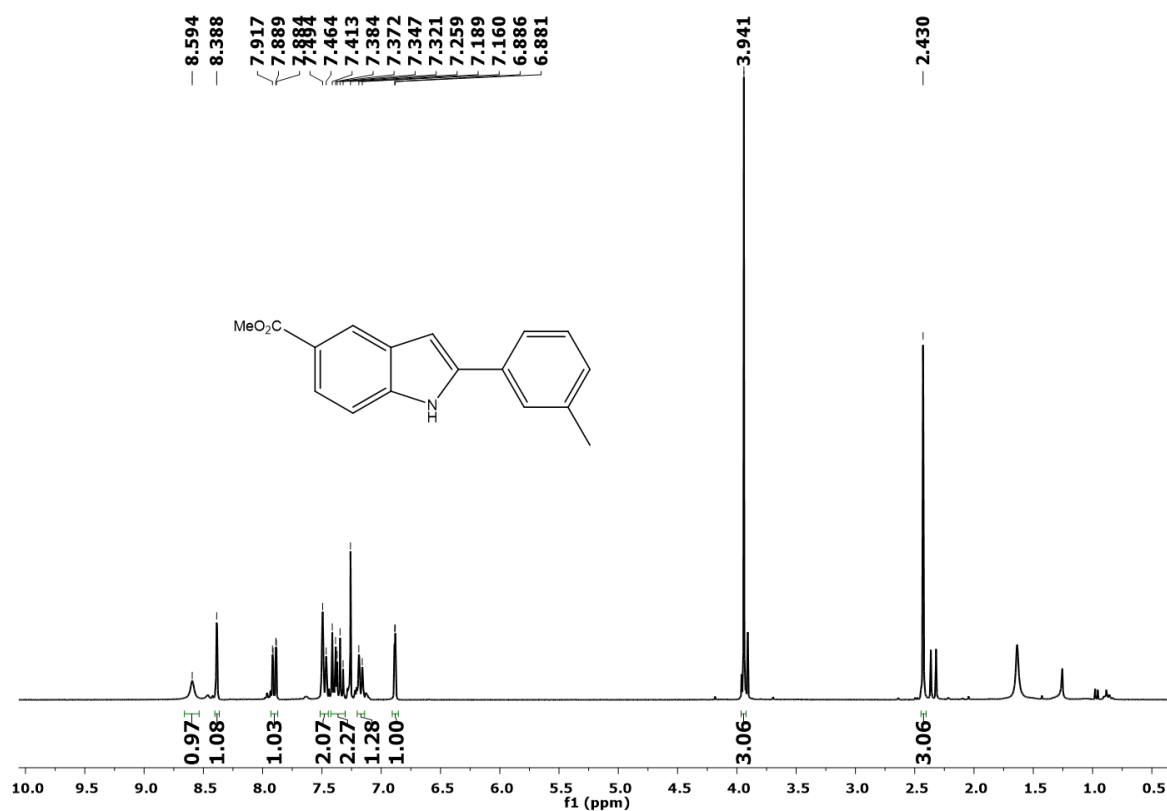

Figure 69S. 300 MHz  $^1\text{H-NMR}$  spectrum of compound **3ac** in  $\text{CDCl}_3$

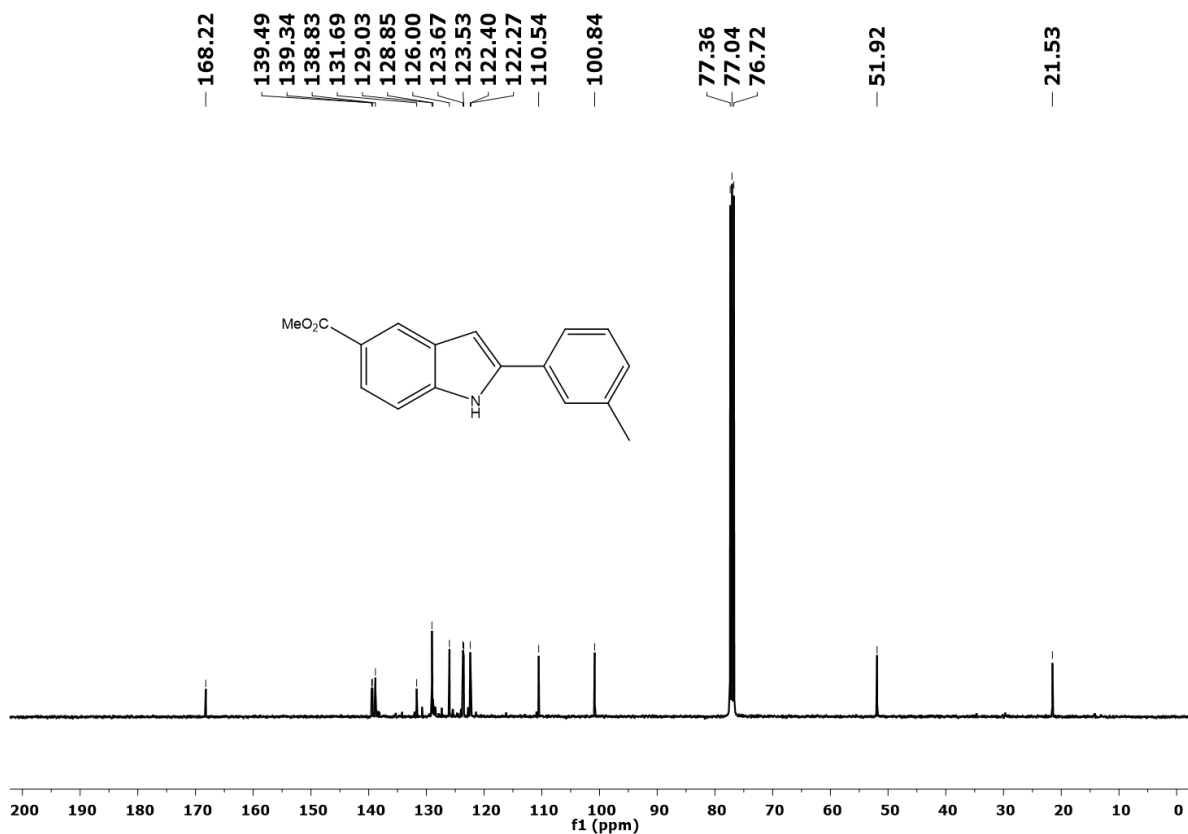

Figure 70S. 101 MHz <sup>13</sup>C-NMR spectrum of compound **3ac** in CDCl<sub>3</sub>

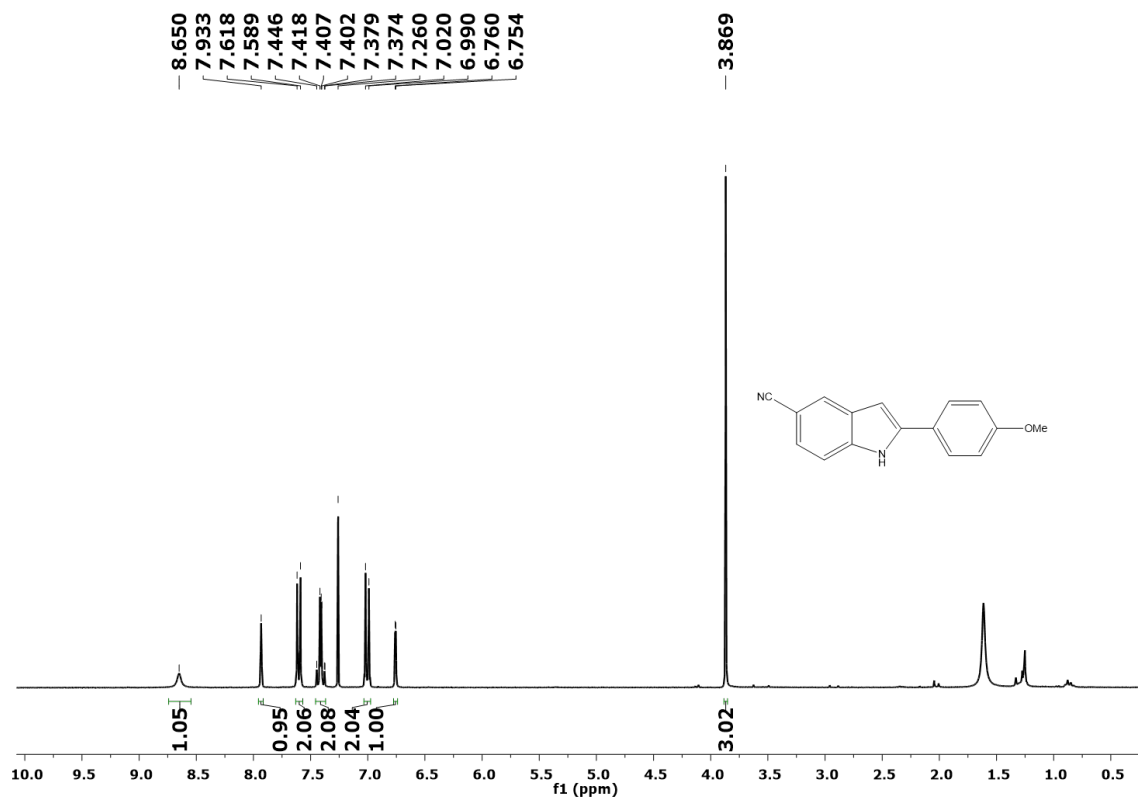

Figure 71S. 300 MHz <sup>1</sup>H-NMR spectrum of compound **3ad** in CDCl<sub>3</sub>



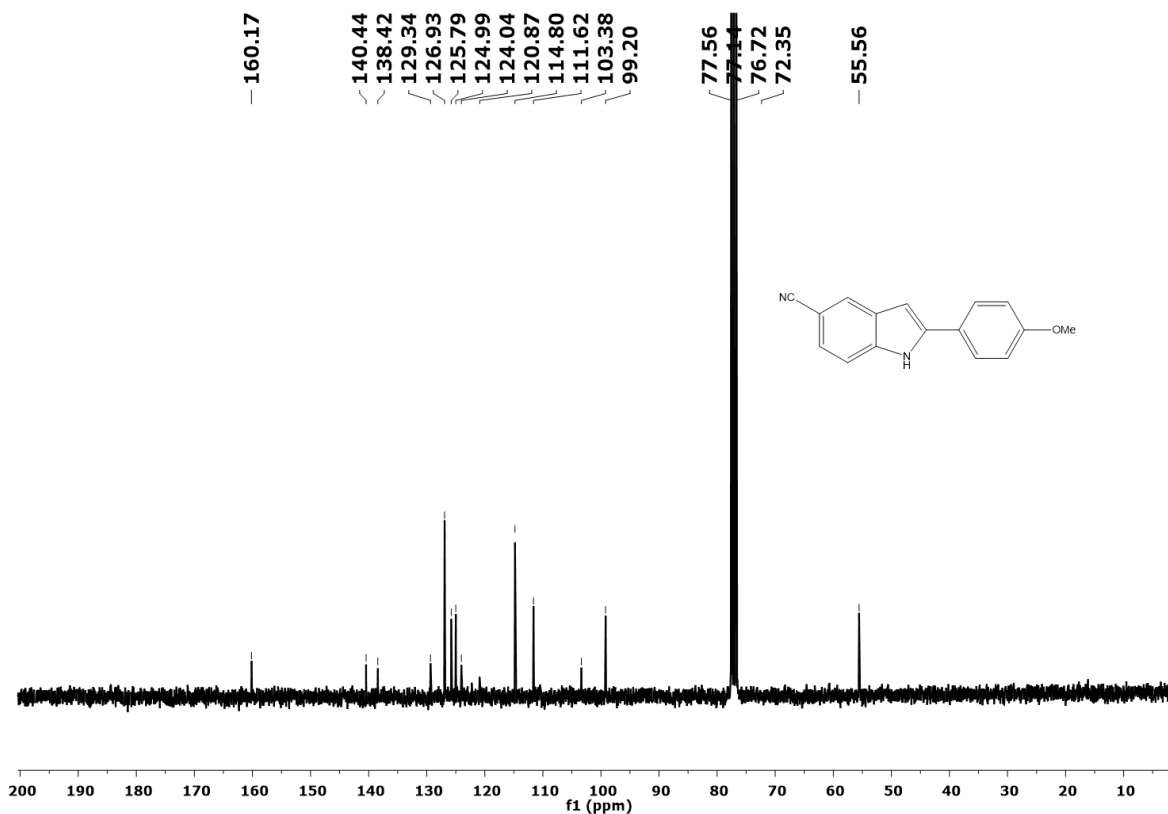

Figure 72S. 75 MHz  $^{13}\text{C-NMR}$  spectrum of compound **3ad** in  $\text{CDCl}_3$

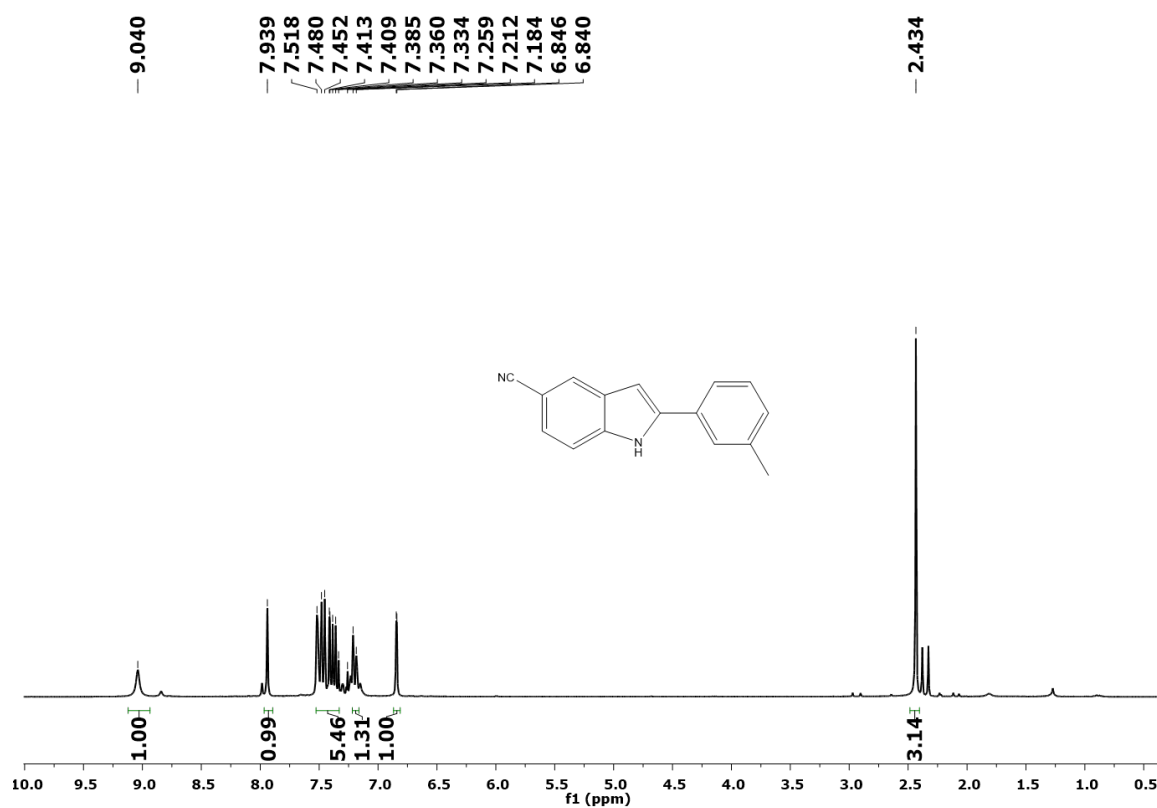

Figure 73S. 300 MHz  $^1\text{H-NMR}$  spectrum of compound **3ae** in  $\text{CDCl}_3$

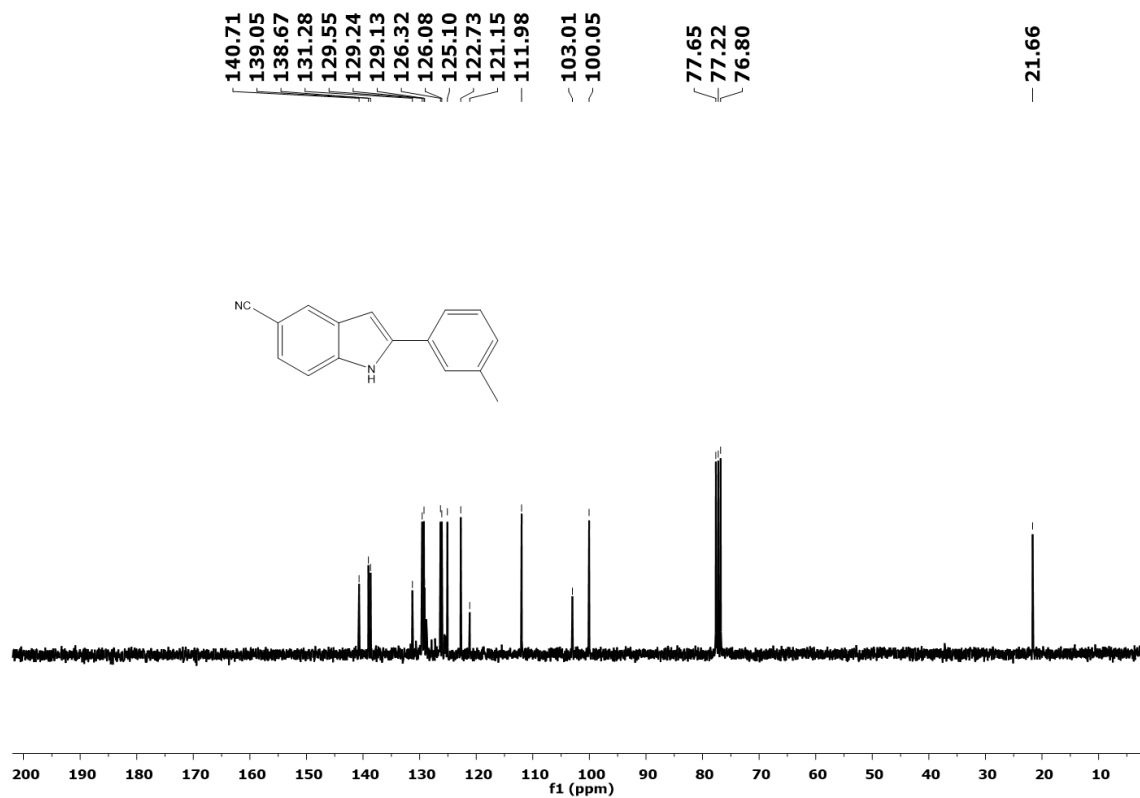

Figure 74S. 75 MHz  $^{13}\text{C-NMR}$  spectrum of compound 3ae in  $\text{CDCl}_3$

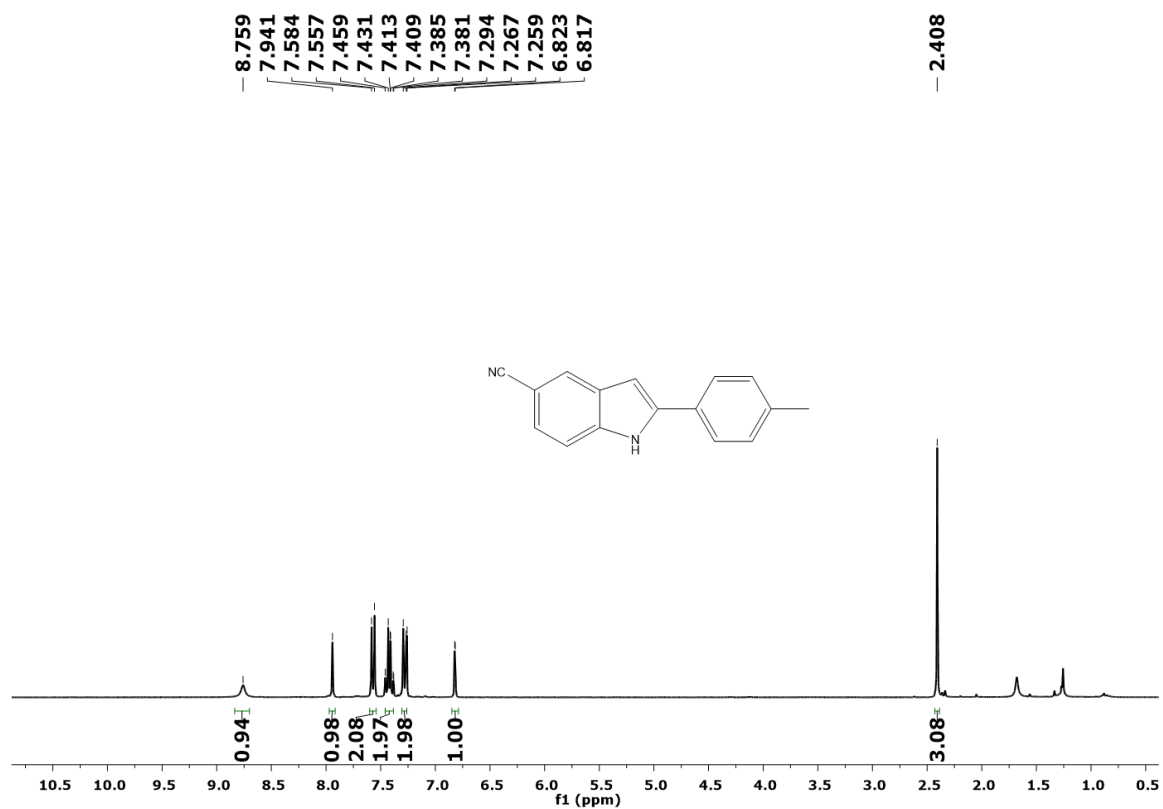

Figure 75S. 300 MHz  $^1\text{H-NMR}$  spectrum of compound 3af in  $\text{CDCl}_3$

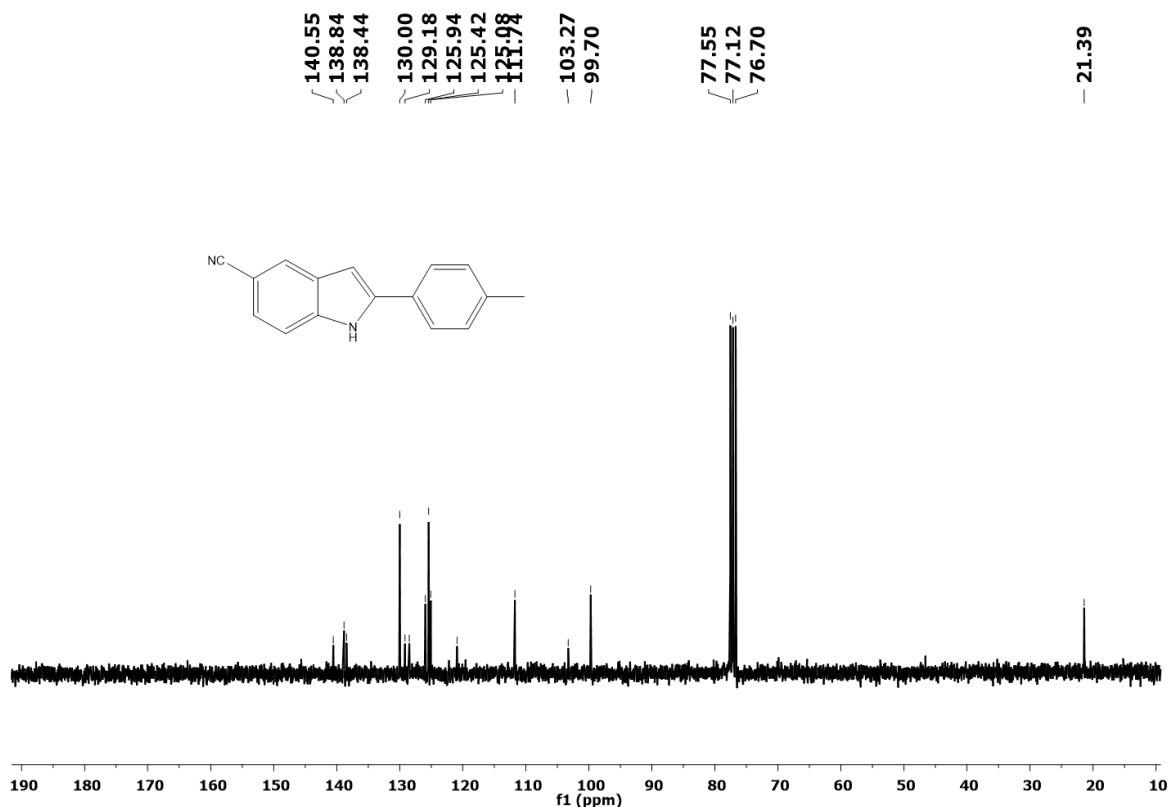

Figure 76S. 75 MHz  $^{13}\text{C-NMR}$  spectrum of compound **3af** in  $\text{CDCl}_3$

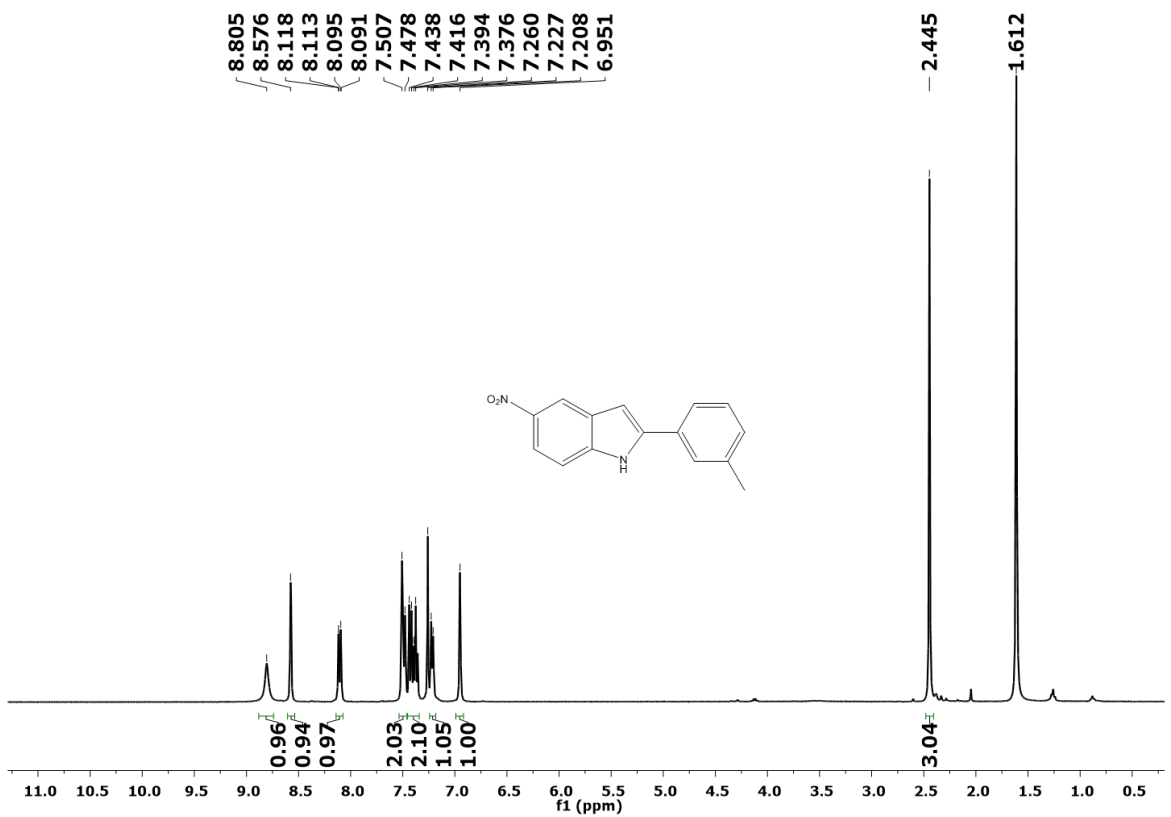

Figure 77S. 400 MHz  $^1\text{H-NMR}$  spectrum of compound **3ag** in  $\text{CDCl}_3$

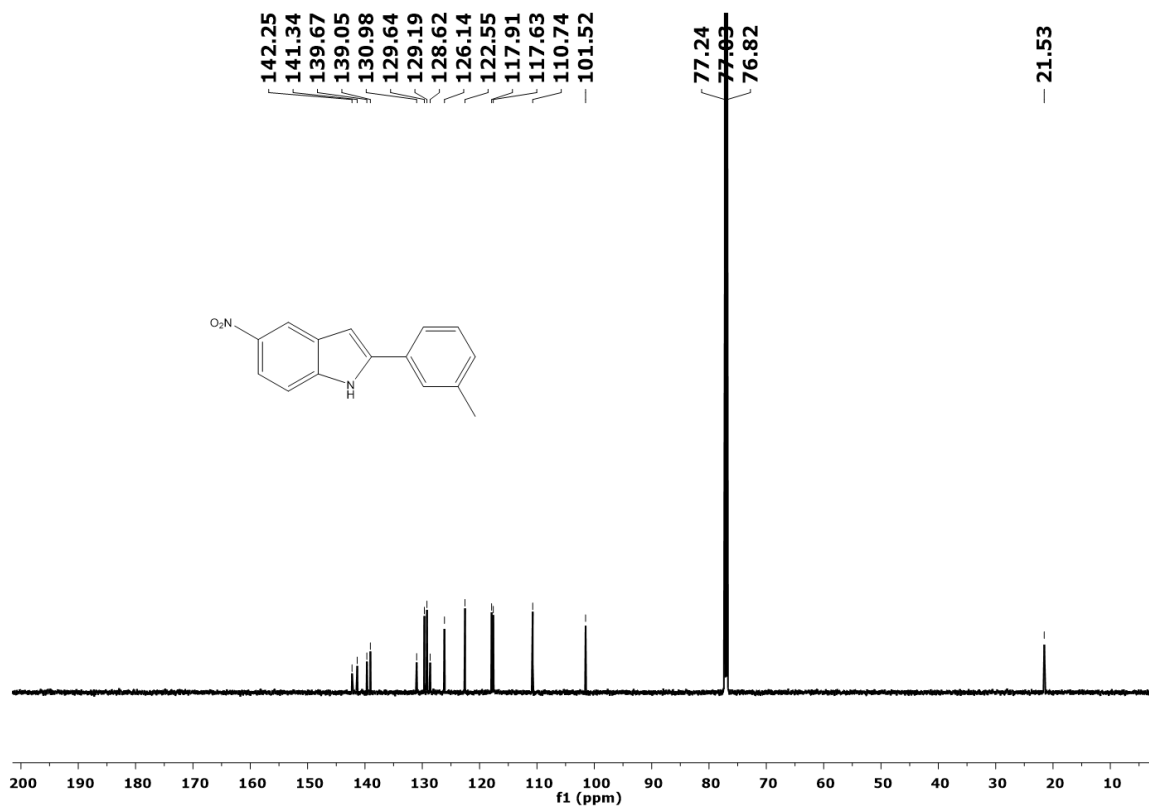

Figure 78S. 151 MHz <sup>13</sup>C-NMR spectrum of compound **3ag** in CDCl<sub>3</sub>

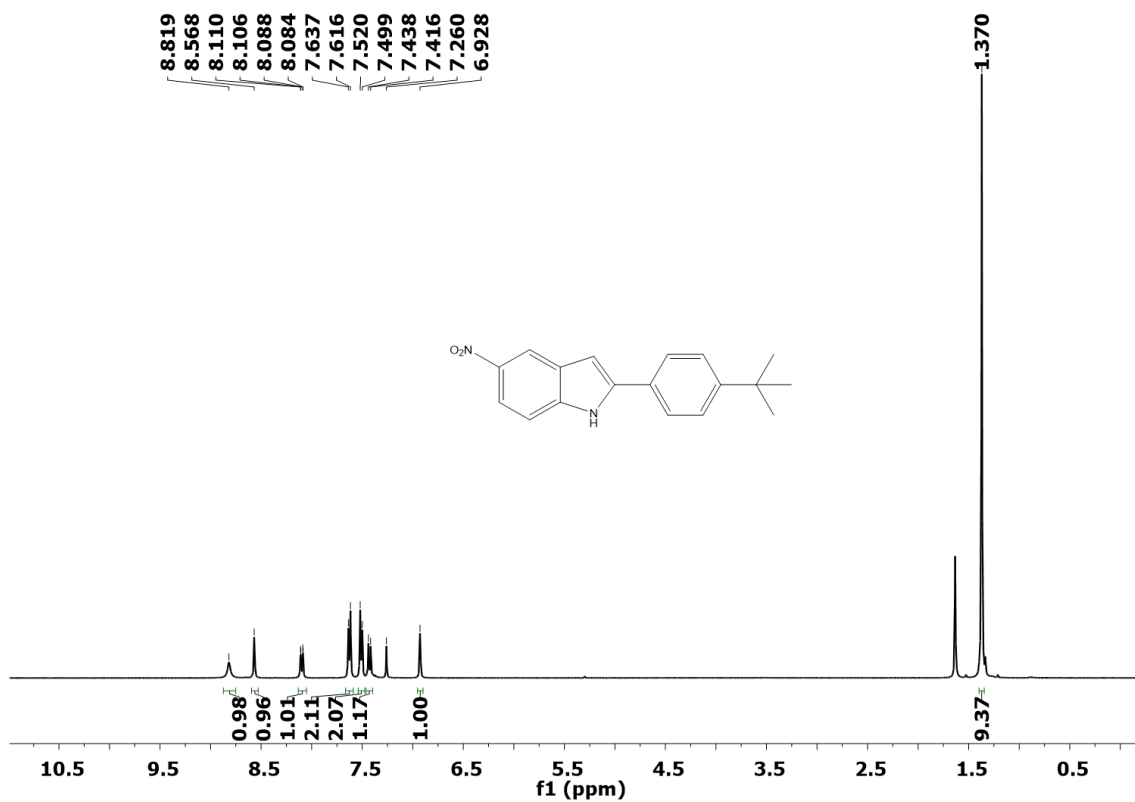

Figure 79S. 400 MHz <sup>1</sup>H-NMR spectrum of compound **3ah** in CDCl<sub>3</sub>

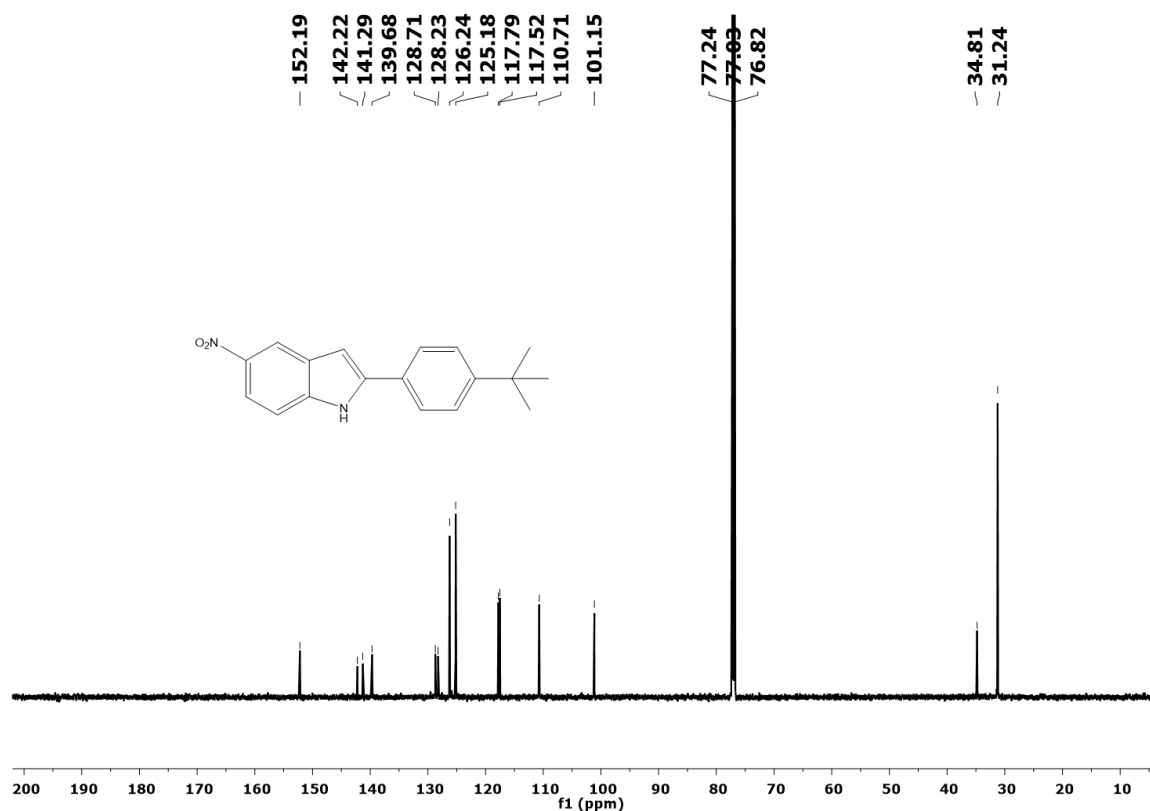

Figure 80S. 151 MHz <sup>13</sup>C-NMR spectrum of compound **3ah** in CDCl<sub>3</sub>

## V. Crystal Information and Structure:

X-ray quality single crystals of **CATMC-Pd** was obtained by diffusion of diethyl-ether into the DMSO. Single crystal X-ray diffraction data were collected using Bruker APEX III D8 Venture, PHOTON II detector (Mo K $\alpha$ ,  $\lambda=0.7107$  Å). Data collection, data reduction, structure solution and refinement were carried out using the software package of the corresponding diffractometer. All the structures were solved by direct methods and refined in a routine manner. Hydrogen atoms were geometrically fixed. All the non-hydrogen atoms were treated anisotropically. CCDC-numbers **2272228** contain the crystallographic data for **CATMC-Pd**. These data can be obtained free of charge from The Cambridge Crystallographic Data Centre via [www.ccdc.cam.ac.uk/data\\_request/cif](http://www.ccdc.cam.ac.uk/data_request/cif).

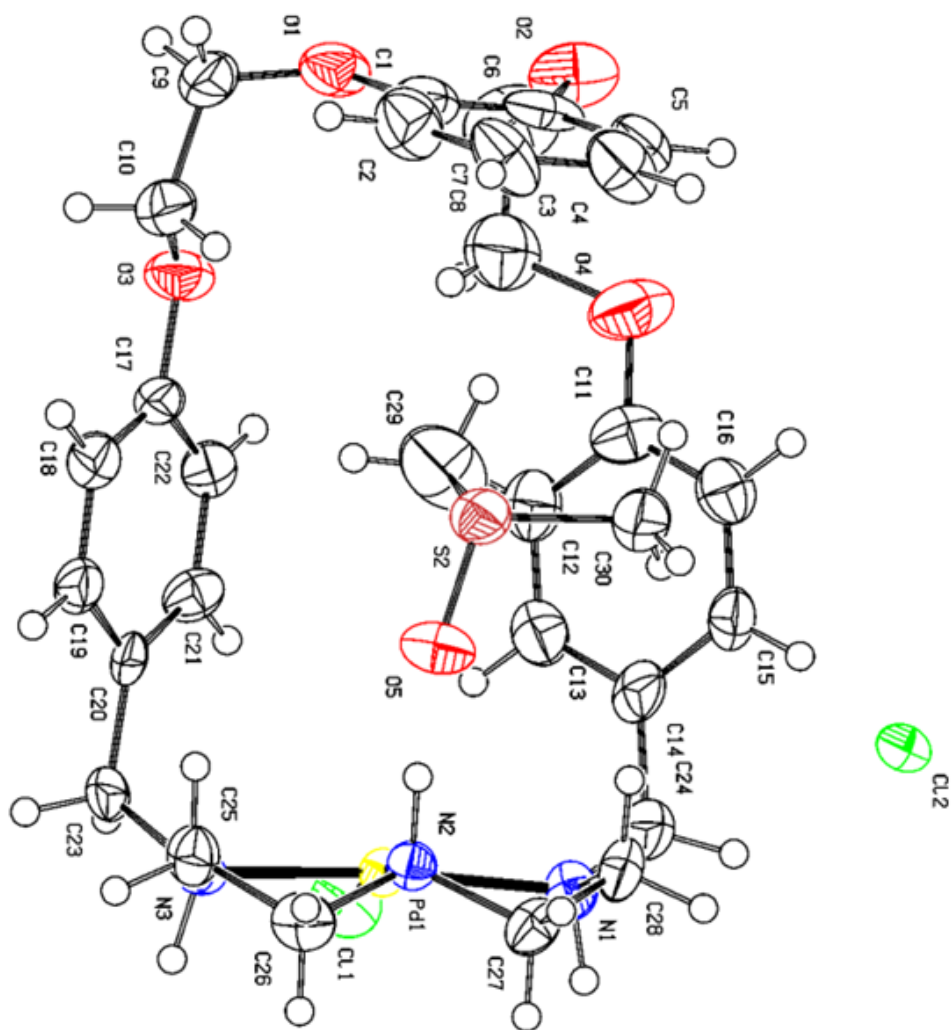

Figure 81S. ORTEP diagram of CATMC-Pd. Thermal ellipsoids are shown at 50% probability.

Table 2S. Crystallographic details of the CATMC-Pd crystal, related to Figure 3a

| Identification code | CATMC-Pd                                                                          |
|---------------------|-----------------------------------------------------------------------------------|
| CCDC No.            | 2272228                                                                           |
| Empirical formula   | C <sub>30</sub> H <sub>41</sub> Cl <sub>2</sub> N <sub>3</sub> O <sub>5</sub> PdS |
| Formula weight      | 733.02                                                                            |
| Temperature/K       | 140.02                                                                            |
| Crystal system      | monoclinic                                                                        |
| Space group         | P2 <sub>1</sub> /n                                                                |

|                                                         |                                                                |
|---------------------------------------------------------|----------------------------------------------------------------|
| <b>a/Å</b>                                              | 8.576(3)                                                       |
| <b>b/Å</b>                                              | 38.304(13)                                                     |
| <b>c/Å</b>                                              | 10.469(4)                                                      |
| <b><math>\alpha</math>/°</b>                            | 90                                                             |
| <b><math>\beta</math>/°</b>                             | 109.747(10)                                                    |
| <b><math>\gamma</math>/°</b>                            | 90                                                             |
| <b>Volume/Å<sup>3</sup></b>                             | 3236.7(19)                                                     |
| <b>Z</b>                                                | 4                                                              |
| <b><math>\rho_{\text{calc}}/\text{cm}^3</math></b>      | 1.504                                                          |
| <b><math>\mu/\text{mm}^{-1}</math></b>                  | 0.845                                                          |
| <b>F(000)</b>                                           | 1512.0                                                         |
| <b>Crystal size/mm<sup>3</sup></b>                      | 0.6 × 0.5 × 0.4                                                |
| <b>Radiation</b>                                        | MoK $\alpha$ ( $\lambda$ = 0.71073)                            |
| <b>2<math>\Theta</math> range for data collection/°</b> | 4.648 to 50.052                                                |
| <b>Index ranges</b>                                     | -10 ≤ h ≤ 10, -44 ≤ k ≤ 45, -12 ≤ l ≤ 12                       |
| <b>Reflections collected</b>                            | 23410                                                          |
| <b>Independent reflections</b>                          | 5684 [ $R_{\text{int}}$ = 0.1073, $R_{\text{sigma}}$ = 0.0932] |
| <b>Data/restraints/parameters</b>                       | 5684/22/381                                                    |
| <b>Goodness-of-fit on F<sup>2</sup></b>                 | 1.070                                                          |
| <b>Final R indexes [<math>I \geq 2\sigma(I)</math>]</b> | $R_1$ = 0.0933, $wR_2$ = 0.2378                                |
| <b>Final R indexes [all data]</b>                       | $R_1$ = 0.1076, $wR_2$ = 0.2494                                |
| <b>Largest diff. peak/hole / e Å<sup>-3</sup></b>       | 1.27/-1.14                                                     |
